# Supplementary material for: Is the non-identity problem relevant to public health and policy? An online survey
Source: BMC Med Ethics. 2019 Jul 5;20:46. doi: 10.1186/s12910-019-0379-5 (PMC6612186; doi:10.1186/s12910-019-0379-5)
Supplement: Supplementary file 1 — Raw data. (CSV 411 kb) [file 12910_2019_379_MOESM1_ESM.csv]

StartDate	EndDate	Status	IPAddress	Progress	Duration (in seconds)	Finished	RecordedDate	ResponseId	RecipientLastName	RecipientFirstName	RecipientEmail	ExternalReference	LocationLatitude	LocationLongitude	DistributionChannel	Consent	Pre Likert	C>M reason pre	M>C reason pre	C>M slider pre_1	C>M always pre	M>C slider pre_1	M>C always pre	Post Likert	C>M reason post	M>C reason post	C>M slider post_1	C>M always post	M>C slider post_1	M>C always post	14yog wrong	14yog harm	14yog blame	dep wrong	dep harm	dep blame	ivf wrong	ivf harm	ivf blame	gender	nationality	age	education	phil study	NIP reading	children	religious	assignmentId	hitId
Start Date	End Date	Response Type	IP Address	Progress	Duration (in seconds)	Finished	Recorded Date	Response ID	Recipient Last Name	Recipient First Name	Recipient Email	External Data Reference	Location Latitude	Location Longitude	Distribution Channel	In this study we are interested in how people think about issues around reproduction, climate, and fertility treatment. Before you begin, please read the following information to confirm you are happy to take part. This is a requirement by Oxford University. Thank you for your interest in helping us. This study consists of a simple electronic questionnaire, to be completed online. Your participat…	Imagine that you know that Contraception and Mosquito repellent cost the same and are equally effective and safe. Which of the two options would you fund?	You answered that you would fund Contraception over Mosquito repellent. Why did you choose to fund Contraception over Mosquito repellent?	You answered that you would fund Mosquito repellent over Contraception. Why did you choose to fund Mosquito repellent over Contraception?	Number of cases Mosquito repellent avoids	C>M always pre	Number of cases Contraception avoids	M>C always pre	Imagine that you know that Contraception and Mosquito repellent cost the same and are equally effective and safe. Which of the two options would you fund?	You answered that you would fund Contraception over Mosquito repellent. Why did you choose to fund Contraception over Mosquito repellent?	You answered that you would fund Mosquito repellent over Contraception. Why did you choose to fund Mosquito repellent over Contraception?	Number of cases Mosquito repellent avoids	C>M always post	Number of cases Contraception avoids	M>C always post	'The girl’s choice to have a child so young was morally wrong.' Do you agree?	'By choosing to have a child so young, the girl harmed "James".' Do you agree?	'"James" could blame his mother for giving him a bad start to life.' Do you agree?	'Choosing Depletion over Conservation would be morally wrong.' Do you agree?	'If we choose Depletion over Conservation, we will harm people in the future.' Do you agree?	'If we choose Depletion over Conservation, people in the future could blame us for our choice.' Do you agree?	The disease the embryos may have inherited causes microcephaly (small head size and severe intellectual disability). What do you think should be done?	The disease the embryos may have inherited causes severe deafness (unable to hear from birth). What do you think should be done?	The disease the embryos may have inherited causes low IQ (in the bottom 25% of what is considered normal intelligence). What do you think should be done?	What is your gender?	What is your nationality?	What is your age?	What is the highest level of education you have completed?	Have you ever studied philosophy before?	Have you ever read about the non-identity problem before?	Do you currently have children?	Do you regard yourself as belonging to any particular religion?	assignmentId	hitId
{"ImportId":"startDate"}	{"ImportId":"endDate"}	{"ImportId":"status"}	{"ImportId":"ipAddress"}	{"ImportId":"progress"}	{"ImportId":"duration"}	{"ImportId":"finished"}	{"ImportId":"recordedDate"}	{"ImportId":"_recordId"}	{"ImportId":"recipientLastName"}	{"ImportId":"recipientFirstName"}	{"ImportId":"recipientEmail"}	{"ImportId":"externalDataReference"}	{"ImportId":"locationLatitude"}	{"ImportId":"locationLongitude"}	{"ImportId":"distributionChannel"}	{"ImportId":"QID10"}	{"ImportId":"QID149"}	{"ImportId":"QID162_TEXT"}	{"ImportId":"QID163_TEXT"}	{"ImportId":"QID150_1"}	{"ImportId":"QID151"}	{"ImportId":"QID152_1"}	{"ImportId":"QID153"}	{"ImportId":"QID156"}	{"ImportId":"QID165_TEXT"}	{"ImportId":"QID164_TEXT"}	{"ImportId":"QID159_1"}	{"ImportId":"QID160"}	{"ImportId":"QID157_1"}	{"ImportId":"QID158"}	{"ImportId":"QID82"}	{"ImportId":"QID83"}	{"ImportId":"QID86"}	{"ImportId":"QID90"}	{"ImportId":"QID91"}	{"ImportId":"QID92"}	{"ImportId":"QID94"}	{"ImportId":"QID96"}	{"ImportId":"QID123"}	{"ImportId":"QID99"}	{"ImportId":"QID100_TEXT"}	{"ImportId":"QID101_TEXT"}	{"ImportId":"QID103"}	{"ImportId":"QID166"}	{"ImportId":"QID167"}	{"ImportId":"QID105"}	{"ImportId":"QID106"}	{"ImportId":"assignmentId"}	{"ImportId":"hitId"}
2016-07-07 14:36:32	2016-07-07 14:50:35	1		100	843	1	2016-07-07 14:50:37	R_ymOv4dc9t76FaSt					51.75	-1.25	preview	4															3	6	5	2	6	2	3	9		1	UK	42	6			1	3
2016-07-08 08:06:57	2016-07-08 08:15:13	0	83.32.71.97	100	496	1	2016-07-08 08:15:15	R_2vdIkPr4Y7d4Bwr					36.13330078125	-5.4505004882812	anonymous	4															3	7	7	5	7	7	1	10	7	1	Aus	52	6			1	2
2016-07-18 13:32:37	2016-07-18 13:35:58	0	124.189.134.44	3	200	0	2016-07-25 13:36:57	R_VR4kXdHws2hHCpP							anonymous	4
2016-11-01 03:08:31	2016-11-01 03:17:42	1		100	551	1	2016-11-01 03:17:44	R_2PzfVPcs30lEFOm					-33.815704345703	151.16680908203	preview	4	3	asdf		132				5						1	2	5	5	2	2	2	1	5	2	1	Australian	22	4	4	1	2	2
2016-11-01 15:19:39	2016-11-01 15:31:44	1		100	725	1	2016-11-01 15:31:45	R_2aCuk8D5n6S9e5R					51.75	-1.25	preview	4	5		sd			102		5					109		5	6	7	1	6	3	3	9	6	1	lkm	lm	6	5	1	1	3
2016-10-31 15:00:26	2016-10-31 15:02:42	0	192.76.8.11	23	136	0	2016-11-07 15:02:58	R_tKz7SpQQOgUl5AJ							anonymous	4
2016-10-31 09:12:23	2016-11-01 15:05:51	0	163.1.72.150	17	107607	0	2016-11-08 15:06:29	R_UMAHNb8T1tywVOh							anonymous	4
2016-11-09 13:40:23	2016-11-09 13:46:00	0	129.67.118.218	100	337	1	2016-11-09 13:46:02	R_cSKFx4E7S9ZGdfr					51.75	-1.25	anonymous	4	5		test			150		5		test			172		3	6	6	2	5	3	2	2	2	1	df	asdfsd	6	5	1	1	3
2016-11-03 00:43:55	2016-11-03 00:44:44	0	58.111.133.222	44	48	0	2016-11-10 00:45:17	R_2WMufD1HTmtp1Lb							anonymous	4	3				1			5					128
2016-11-28 15:40:50	2016-11-28 15:43:56	0	109.150.15.79	2	186	0	2016-12-05 15:44:44	R_2Xd28zjAw3qZFCz							anonymous	4
2017-01-03 05:29:20	2017-01-03 06:32:27	0	220.244.7.238	100	3786	1	2017-01-03 06:32:28	R_1DvY6JGnvLzI07a					-37.810302734375	144.95440673828	anonymous	4	1	As someone who always gets bitten by mosquitos, regardless of repellent, I don't think it is enough of a prevention method to administer repellent alone.		101				2	I don't have any particular attachment to the idea of one child over another at the point of conception, so this is not an issue for me. I struggled with this question however, as it also made sense to protect the mother from being bitten in the first place! For me there would also be concerns over the health effects of both the contraception and the repellent on the mother – very high deet chemi…		111				5	5	5	1	1	1	4	3	3	2	British/Australian	27	6	2	2	2	2
2017-01-08 01:01:11	2017-01-08 01:08:15	0	148.75.148.233	100	424	1	2017-01-08 01:08:16	R_3nN5Ei9HNtgftgO					41.321792602539	-74.200798034668	anonymous	4	5		Because women might already be pregnant and misquitos carry other diseases as well.			123		4							3	3	2	2	2	2	4	2	2	2	USA Caucasin	34	5	1	2	2	3
2017-01-08 01:02:05	2017-01-08 01:08:47	0	77.103.50.108	100	402	1	2017-01-08 01:08:49	R_pnFS7iBz9jjU0al					51.666702270508	-0.066696166992188	anonymous	4	7		Repellent is something applied superficially that does not have a large impact on life plans relative to contraception			601		7					601		3	4	3	3	1	1	4	4	4	1	British	22	5	1	2	2	2
2017-01-08 01:01:02	2017-01-08 01:09:43	0	2.121.31.62	100	521	1	2017-01-08 01:09:44	R_1mszYPR10CqqPWx					56	-3.7666931152344	anonymous	4	6		Because women should be allowed to have babies when they want to. Free contraception should be available anyway, but if it's given conditionally as a preventative measure for Zika, you are policing people's right to plan their families, and furthermore you then place blame on women who do get pregnant during the outbreak (who may have had a contraception failure, or who may just have really wante…				1	6		The same reason as before. It's immoral to police women's reproductive choices in this way. Free contraception should be available anyway, not just because of a Zika outbreak. Mosquito repellant is fairer for everyone and allows people to continue living their lives as they currently do.				1	6	6	6	2	2	1	2	2	1	2	British	27	5	1	1	2	1
2017-01-08 01:03:20	2017-01-08 01:12:30	0	209.150.56.254	100	550	1	2017-01-08 01:12:31	R_30c5CB3kJsha8Go					40.710098266602	-74.0166015625	anonymous	4	3	Tough decision -- it came down to contraception providing other benefits in addition to safety from Zika. Why I didn't score it higher was because this approach is unfair to women who want to have children sooner rather than wait.		200				3	To me, this is the same situation as it was initially presented. What babies are born is so incredibly random that whether Tanya or Thomas is born really makes zero difference to me.		200				4	1	1	1	1	1	3	3	3	2	USA	37	6	1	2	2	3
2017-01-08 01:04:56	2017-01-08 01:14:35	0	186.176.46.248	100	578	1	2017-01-08 01:14:36	R_2dv74O1Ska3l1gQ					10.002395629883	-84.116500854492	anonymous	4	6		In my country, where contraception is widely available, 50% of pregnancies are unwanted, clearly, making people accountable for their sex lifes is not the way.			745		6		it doesn't alter demographics			878		4	3	4	2	3	2	4	3	4	2	Costa Rica	32	6	1	2	2	2
2017-01-08 01:06:19	2017-01-08 01:14:37	0	74.96.93.150	100	498	1	2017-01-08 01:14:38	R_2BhvqmHD9sahcBZ					38.89729309082	-77.252296447754	anonymous	4	7					264	1	7		Moral beliefs about contraception				1	7	7	7	3	3	3	1	1	1	2	American	47	5	3	2	1	1
2017-01-08 01:02:14	2017-01-08 01:15:50	0	98.232.9.239	100	815	1	2017-01-08 01:15:51	R_2qfprjwrhAmEKYi					47.610198974609	-122.30429840088	anonymous	4	2			101				2			110				5	2	3	2	1	2	2	2	2	2	USA	30	6	3	2	2	1
2017-01-08 01:01:36	2017-01-08 01:16:52	0	91.64.223.72	100	915	1	2017-01-08 01:16:53	R_XXQtOgzYE3P8PVD					52.515502929688	13.406204223633	anonymous	4	6					653		6					633		6	6	6	2	4	3	3	3	3	2	German	32	7	1	2	2	2
2017-01-08 01:12:00	2017-01-08 01:18:26	0	24.53.83.214	100	386	1	2017-01-08 01:18:28	R_12fief7GCAzoY9A					45.117095947266	-64.414596557617	anonymous	4	5		other diseases are carried by mosquitos, and theyre annoying.			101		4							4	4	4	1	1	1	2	2	2	1	canadian	34	4	1	2	1	1
2017-01-08 01:12:55	2017-01-08 01:20:49	0	174.19.164.51	100	473	1	2017-01-08 01:20:50	R_4MZXF1F0WHNhRwl					33.804504394531	-111.93170166016	anonymous	4	1	Mosquito repellent is environmentally harmful. Contraception also reduces overpopulation and empowers women.			1			1	I did not buy your scenario.			1			1	1	1	1	1	1	5	5	5	3	Earthling	old	6	2	2	2	2
2017-01-08 01:19:47	2017-01-08 01:25:22	0	73.244.241.144	100	335	1	2017-01-08 01:25:24	R_861uR9cuDfFPEMV					26.345306396484	-80.085502624512	anonymous	4	5		Didn't want to force people to not have kids			139		4							6	7	6	5	5	5	5	4	5	1	US	46	5	1	2	1	2
2017-01-08 01:28:35	2017-01-08 01:33:55	0	104.174.112.128	100	320	1	2017-01-08 01:33:56	R_2zRNFlaWNnlgAGp					33.98030090332	-118.45169830322	anonymous	4	1	Because I don't like poisons		101				2	Still don't like poison.		101				3	1	2	1	2	3	5	4	4	2	US	45	6	3	2	2	3
2017-01-08 01:31:42	2017-01-08 01:36:23	0	60.240.36.2	100	280	1	2017-01-08 01:36:24	R_2qyErHwTAQggoNS					-33.881393432617	151.17999267578	anonymous	4	4							6		I want the babies to exist, safely			101		4	4	3	3	3	2	2	2	2	2	Australian	37	5	3	2	2	3
2017-01-08 01:39:46	2017-01-08 01:57:58	0	98.224.242.141	100	1092	1	2017-01-08 01:57:59	R_9GMXvKW5AZlZZ8B					42.543594360352	-83.279197692871	anonymous	4	7		Is the least affecting of peoples' lives			648		7		Least amount of change of peoples' lives			769		7	7	7	4	4	4	1	1	1	1	Usa	36	5	2	2	1	1
2017-01-08 01:10:21	2017-01-08 02:01:49	0	50.43.33.153	100	3088	1	2017-01-08 02:01:51	R_3gO6QBDmgTKREd0					45.444305419922	-122.96630096436	anonymous	4	7		Better to have babies than not have them under contraception method.			300		7		Having babies is better than delaying having babies.			300		4	6	2	2	1	1	2	2	2	1	USA	37	6	1	2	1	3
2017-01-08 02:08:40	2017-01-08 02:14:37	0	121.7.190.113	100	356	1	2017-01-08 02:14:39	R_339fUZvBBJSgEsx					1.2855072021484	103.85650634766	anonymous	4	4							4							5	3	3	3	2	2	4	2	4	2	Singaporean	26	5	4	1	2	2
2017-01-08 01:48:36	2017-01-08 02:17:39	0	73.240.26.25	100	1742	1	2017-01-08 02:17:40	R_1Ks5TdAJdQbUPtA					45.610305786133	-122.74549865723	anonymous	4	1	Empowerment over destruction, no safe insecticide		997	1			1	It's impossible to evaluate two unborn babies. In either case only one would be born and there's no way to predict the favorable outcome.		840	1			7	4	2	1	1	1	2	2	2	2	US citizen	33	6	2	2	2	2
2017-01-08 02:08:00	2017-01-08 02:19:58	0	130.105.215.178	100	718	1	2017-01-08 02:20:00	R_24dg41krdo62mJq					14.648803710938	121.05090332031	anonymous	4	7		safer or less side effects, less "political", more available to everyone - pregnant, intending to become pregnant, or not pregnant			300		7		same reasons as previously stated (i.e. the scenarios presented do not change my thinking or argument)			300		3	5	5	2	2	4	2	2	2	2	Filipino	43	6	3	2	1	1
2017-01-08 02:36:46	2017-01-08 03:22:20	0	206.47.14.252	100	2734	1	2017-01-08 03:22:21	R_2Qmvf673ho2jGkR					45.416595458984	-75.690399169922	anonymous	4	3	I think there might be some added benefits to making contraception available, beyond strictly Zika		200				3	contrsception may also prevent unintended pregnancies as well as delaying planned pregnancies for fear of Zika. Also speculating about the existence of children who not even conceived yet as if they are distinct individuals seems flayed to me, the Tanya with Zika is not the Tanya conceived at the same time who wasn't infected with Zika. I think the assumptions are too broad.		200				3	3	3	4	1	1	2	2	2	1	Canadian	37	5	1	2	1	2
2017-01-08 03:43:08	2017-01-08 03:49:27	0	108.35.143.129	100	379	1	2017-01-08 03:49:29	R_1lt9ax0VQhR5RbE					40.716201782227	-74.618301391602	anonymous	4	4							4							3	3	3	2	2	1	3	2	2	1	American	Closer to 50 than 40	6	1	1	1	3
2017-01-08 03:22:49	2017-01-08 03:50:14	0	118.209.95.242	100	1645	1	2017-01-08 03:50:15	R_1jqTzETV0K425zZ					-37.790405273438	144.99749755859	anonymous	4	5		women will still become pregnant if they desire to have children			200		6		couple still desire children			200		7	7	7	3	3	2	2	2	1	1	australian	41	7	1	2	2	3
2017-01-08 03:45:37	2017-01-08 03:54:53	0	207.237.115.58	100	556	1	2017-01-08 03:54:54	R_tFmuHNF9cpHpGKZ					40.780502319336	-73.951202392578	anonymous	4	5		seems more likely to be successful.			154	1	5		more likely to be effective.			143	1	6	5	3	6	3	3	3	4	4	1	USA	67	6	5	2	1	2
2017-01-08 03:47:53	2017-01-08 04:05:06	0	190.16.84.203	100	1033	1	2017-01-08 04:05:08	R_25Ntz66b2NRvetI					-34.603302001953	-58.38159942627	anonymous	4	3	I think it's safer and has less risks that using repellent. Even if both depend on the woman's decision to use or apply them.		120				4							5	5	4	5	4	3	3	2	2	2	Argentinian	33	4	2	2	2	3
2017-01-08 04:38:59	2017-01-08 04:53:35	0	73.221.209.2	100	875	1	2017-01-08 04:53:36	R_XkcXm7SDPzmke65					48.686096191406	-122.41040039062	anonymous	4	1	We know mosquito repellent is absorbed by human tissue. The amount of repellent needed to control a rapidly producing population of mosquitos would be immense. The use of this chemical agent would impact balances in nature and could result in unpredicted illnesses or genetic mutations within humans (including the pregnant mother) given enough exposure, of course quantity and exposure levels would…		1000	1			1	I am very leary at the thought of using a chemical agent to treat another orgasm. Too often we find the repercussions of our use of chemicals have unprecedented negatives downstream. If you could find a natural insecticide to treat know, large colonies of these infected insects that would be different. Treating large breeding colonies could have a major impact, but just using a general repellent …		1000	1			6	6	6	4	4	4	2	2	2	2	Causcasian	31	4	3	1	2	2
2017-01-08 04:43:23	2017-01-08 05:25:55	0	104.156.226.253	100	2552	1	2017-01-08 05:25:57	R_28TBlIMAhxulo96					40.465194702148	-74.230697631836	anonymous	4	7		contraceptions might affect a women's hormonal health/ balance. I also think that repellant was a more straightforward and "low stakes" solution, given they cost the same and are equally effective.			101		7		same reason as before			101		7	7	7	7	5	3	4	4	4	1	singaporean	26	5	4	1	2	2
2017-01-08 05:24:12	2017-01-08 05:37:59	0	172.251.50.119	100	827	1	2017-01-08 05:38:01	R_1rB7FOr3M22oMvH					34.252105712891	-118.78430175781	anonymous	4	2	More effective. Women are going to get bitten by mosquitoes no matter what.		200	1			2	Families should be planned, anyway. Why does this child need to be conceived at this exact moment, at the riskiest time? The damage done to society by a micro-encephalitic birth far exceeds the damage done by a delayed birth.		200	1			2	1	2	2	2	1	5	4	5	1	American	35	5	1	2	2	2
2017-01-08 06:44:30	2017-01-08 06:57:12	0	146.255.13.111	100	761	1	2017-01-08 06:57:13	R_33lnzssewXTA8yZ					51.733306884766	0.48330688476562	anonymous	4	7		Contraception presents moral and practical difficulties for some.			165		7		same reason as before. I see your point, but I think it is beyond what we can effectively include in decision making.			152		3	4	3	1	1	2	2	2	2	2	british	43	6	3	2	2	1
2017-01-08 07:18:10	2017-01-08 07:31:02	0	95.175.104.64	100	772	1	2017-01-08 07:31:04	R_31TSKvo398g9nv2					60.175598144531	24.934204101562	anonymous	4	7					101		4							3	5	3	2	2	2	2	2	2	1	Finnish	30	6	2	2	2	3
2017-01-08 08:58:34	2017-01-08 09:10:22	0	94.174.34.183	100	707	1	2017-01-08 09:10:23	R_33v9y0wSBIaIpEX					51.318893432617	-2.2086029052734	anonymous	4	3	I thought it might be more effective, and cover a range of Stis too, whilst the mosquito repellent may be less effective, and have side effects - as it is quite a powerful chemical.		101				4							4	4	4	3	3	3	2	2	2	2	English	46	5	3	1	2	3
2017-01-08 10:28:13	2017-01-08 10:42:12	0	86.42.242.162	100	838	1	2017-01-08 10:42:13	R_2aRaN4mobr85jSD					53.338897705078	-6.2595062255859	anonymous	4	7		Less intrusive			101		7		As before, it is less intrusive			101		7	7	4	1	1	3	2	2	2	2	Irish	41	6	3	2	1	2
2017-01-08 10:27:43	2017-01-08 10:45:01	0	185.137.19.67	100	1037	1	2017-01-08 10:45:02	R_3smOyD8XFJWekZH					52.382400512695	4.8995056152344	anonymous	4	1	Provided it is used I think this will be more reliable, whatever the preamble said.		1000	1			1	Same reason as before: I just don't believe the mr would be as effective. Reduce risk.		1000	1			2	6	2	6	6	2	5	4	4	1	British	65	5	1	2	1	1
2017-01-08 11:23:15	2017-01-08 11:34:52	0	93.104.5.62	100	696	1	2017-01-08 11:34:53	R_3iUyc5I3Nihndrs					48.122406005859	11.544906616211	anonymous	4	6		Families should not have to delay having kids because of environment (or other external) factors			152		6		See above			149		4	5	2	2	7	2	2	2	2	2	German	39	6	5	2	2	2
2017-01-08 13:01:32	2017-01-08 13:09:29	0	89.137.185.203	100	477	1	2017-01-08 13:09:30	R_3RpB3vVFFObl1mk					45.749404907227	21.227203369141	anonymous	4	2	Because I think there is a higher rate of success in Contraception. Mosquitto repellents are more random/hasardous.		205				4							3	3	5	1	1	3	4	3	3	2	Romanian	31	6	2	2	2	3
2017-01-08 13:06:29	2017-01-08 13:12:11	0	37.205.127.166	100	342	1	2017-01-08 13:12:13	R_3qsdZCkxcBYM6Bh					55.712295532227	12.056396484375	anonymous	4	4							5		Because delaying many pregnancies will give problems when a generation is missing in the adult population.			1000	1	3	3	3	3	2	2	2	2	1	2	Danish	44	6	1	2	1	2
2017-01-08 13:05:54	2017-01-08 13:14:21	0	67.45.97.106	100	506	1	2017-01-08 13:14:22	R_2tmU0PdmA58grEC					30.450698852539	-91.154602050781	anonymous	4	1	It allows for family planning outside of the Zika outbreak.		101				4							5	3	2	3	2	2	4	4	4	1	American	42	6	1	2	1	2
2017-01-08 13:07:09	2017-01-08 13:14:37	0	75.168.160.242	100	448	1	2017-01-08 13:14:39	R_2ZJIM1JJyct4763					44.955505371094	-93.166999816895	anonymous	4	4							7		If you could prevent the disease than women could choose to have children when they want versus waiting and hoping the disease wouldn't happen.			101		4	4	4	2	2	2	2	2	2	2	Usa	47	6	3	1	1	1
2017-01-08 13:09:10	2017-01-08 13:16:43	0	86.140.184.197	100	453	1	2017-01-08 13:16:44	R_3mUUHdOIcrGRTod					53.433303833008	-2.4167022705078	anonymous	4	6		For women who are already pregnant, contraception would be too late.			101		4							5	3	3	3	3	1	2	2	1	1	British	39	6	1	2	2	2
2017-01-08 13:06:20	2017-01-08 13:17:27	0	91.183.80.87	100	666	1	2017-01-08 13:17:29	R_12EHtsJ6DRsHSpQ					50.846603393555	4.3527984619141	anonymous	4	6		Women can choose when to become pregnant and there seems to be no downside to the repellent.			110		6		I still believe that women should be able to choose the time for their pregnancy.			110		4	3	5	1	1	3	4	4	2	2	Russian	30	6	3	2	2	3
2017-01-08 13:03:08	2017-01-08 13:18:17	0	2.235.232.70	100	908	1	2017-01-08 13:18:18	R_3PpYhwIGIKaAEiM					45.408905029297	9.1255950927734	anonymous	4	6		it doesn't involve the choice of the citizens,everybody get protected by the mosquito repellent, while funding contraceptive measurds could lead some citizens out of the program due to moral/ethical/religious reasonss			262		6		same reason as the previous scenario			257		5	5	5	1	1	1	2	2	2	1	Italian	25	6	2	1	2	2
2017-01-08 13:06:33	2017-01-08 13:18:52	0	74.97.25.105	100	738	1	2017-01-08 13:18:53	R_3GfW7JntsZP19qW					41.643402099609	-71.478302001953	anonymous	4	2	Repellent is toxic and causes ecosystem unbalance		501				2	Even without contraception we can't predict who will be born when		499				3	3	4	1	2	4	3	3	3	2	American	62	5	3	2	1	3
2017-01-08 13:03:03	2017-01-08 13:19:15	0	89.33.166.118	100	972	1	2017-01-08 13:19:16	R_3lLcRm3AvOfaBt9					44.433303833008	26.100006103516	anonymous	4	6		Because one can never be too sure that all people will use the contraception method and also because the repellent will help all the public categories not just the pregnant women.			800		7		Because it is not natural to alter the birth pattern in an area for a reason that can be avoided through other means than contraception			797		3	3	2	2	2	1	4	4	4	2	Romanian	37	6	1	2	1	2
2017-01-08 13:06:36	2017-01-08 13:20:38	0	73.171.150.10	100	842	1	2017-01-08 13:20:40	R_1FwvDjdQFw7CVuY					30.791702270508	-81.573097229004	anonymous	4	6		Do not want to limit a womans desire to have sexual relations or their desire to get pregnant.			309	1	7		healthcate should not influence family composition			301	1	6	4	6	2	2	2	4	3	2	2	United States	30	5	3	2	1	3
2017-01-08 13:13:16	2017-01-08 13:22:13	0	67.1.168.107	100	537	1	2017-01-08 13:22:15	R_vrDB0NjshUscty1					32.311798095703	-110.92590332031	anonymous	4	1	The risks are lower to health and welfare		103				1	Risks and welfare		101				4	3	2	4	1	1	4	4	4	2	Usa	47	6	3	1	1	3
2017-01-08 13:06:44	2017-01-08 13:22:40	0	86.185.133.12	100	955	1	2017-01-08 13:22:41	R_41650Q1mzRXG3w5					53.416702270508	-2.8000030517578	anonymous	4	7		Because it leaves women the choice of becoming pregnant or not at whatever time they feel is right for them.				1	7		Women should not have to choose between sick babies or no babies at all. Mosquito repellent prevents sick babies while still allowing women to become pregnant when they choose.				1	4	4	4	1	1	2	2	2	2	2	American	38	5	4	2	1	2
2017-01-08 13:11:32	2017-01-08 13:22:56	0	195.249.187.135	100	684	1	2017-01-08 13:22:58	R_2pYISBZ8epqRYdb					55.675903320312	12.565505981445	anonymous	4	5		Because country-wide contraception will negatively affect the birthrate and, consequently, the economy at some point in the future.			500		5		same reason as first time			561		4	3	5	3	4	3	4	4	4	2	romanian	24	5	2	2	2	3
2017-01-08 13:11:58	2017-01-08 13:23:04	0	80.111.153.234	100	666	1	2017-01-08 13:23:05	R_1HcaB60LLRM16nu					53.338897705078	-6.2595062255859	anonymous	4	1	It gives full control to the woman. All contraception should be free		115				1	The two babies don't exist, hypothetical scenarios about babies not existing due to the woman using contraception can lead to very dangerous reasoning, and can be used by people to control a woman's access to contraception. Tanya never existed, so it's a moot point.		115				2	3	3	2	4	3	4	4	4	2	Irish	31	5	1	2	2	2
2017-01-08 13:11:00	2017-01-08 13:23:56	0	135.23.211.141	100	776	1	2017-01-08 13:23:58	R_10NqivK6ZrEI49G					43.665496826172	-79.420402526855	anonymous	4	7		Some women don't have the option to delay getting pregnant due to age.			550		7		Delaying pregnancy will also put greater strain on national infrastructure. Assuming it would cause a large baby boom at some point in the future when the threat passes.			550	1	6	5	3	2	2	2	3	3	3	2	Canadian	48	6	1	2	1	2
2017-01-08 13:07:40	2017-01-08 13:24:04	0	87.162.122.156	100	983	1	2017-01-08 13:24:06	R_YSwY94nnyEQi4Dv					52.649993896484	8.11669921875	anonymous	4	2	Mosquito repellent is already easily available.		101				4							5	5	3	4	4	4	2	2	2	2	American	35	6	2	2	1	1
2017-01-08 13:14:35	2017-01-08 13:24:33	0	124.11.64.23	100	597	1	2017-01-08 13:24:36	R_3nJgLYfrNlWs88l					25.041793823242	121.49661254883	anonymous	4	6		people can't realistically all delay getting pregnant			1000		6		same as before -- you can't delay getting pregnant because there's a disease going around, it's not how it works			997		7	7	7	1	1	1	4	3	4	2	usa	32	6	2	2	2	3
2017-01-08 13:14:57	2017-01-08 13:24:45	0	73.46.196.235	100	588	1	2017-01-08 13:24:47	R_3PYTz8wuRCJ3mnL					27.296493530273	-80.291999816895	anonymous	4	6		Because it would protect unborn children regardless of their mother's use (or not) of repellent.				1	6		For the same reasons as first reported,				1	3	3	6	1	1	1	2	2	2	2	US	60	6	3	1	1	1
2017-01-08 13:16:19	2017-01-08 13:25:38	0	2.234.5.130	100	559	1	2017-01-08 13:25:40	R_Z3IGd9s75Wi2mL7					45.807205200195	13.534194946289	anonymous	4	7		It seems way more efficient, I'm guessing most woman that don't want babies are already taking contraception, so it's better the repellent.			101		7		Mosquito repellent still seems more efficient			101		7	7	7	1	1	1	2	2	1	1	Portuguese	26	6	2	2	2	2
2017-01-08 13:16:22	2017-01-08 13:26:00	0	217.214.147.166	100	578	1	2017-01-08 13:26:02	R_zbZIo1HrJBRyjnj					59.32470703125	18.055999755859	anonymous	4	4							4							3	4	4	3	3	3	2	2	2	2	Swedish	57	6	3	2	1	2
2017-01-08 13:14:24	2017-01-08 13:26:15	0	89.134.80.42	100	711	1	2017-01-08 13:26:16	R_3Jgu7FeGayPVuid					47.492492675781	19.051406860352	anonymous	4	6		Because who knows when the outbreak will end and if and when it does there might be another outbreak of the same or different disease spread by mosquitos. You'll never be able to eliminate the risk entirely, but to stimulate contraception would but putting future lives on hold with the implicit promise of health for the future baby. Which ofcourse is a fallacy.			888	1	6		Same reason as before, the argument of the conception of another person doesn't alter my opinion as I believe there is a difference in value between Tanya and Thomas				1	6	4	6	2	2	2	4	2	2	2	Dutch	30	5	3	2	1	3
2017-01-08 13:19:16	2017-01-08 13:28:07	0	50.90.172.33	100	530	1	2017-01-08 13:28:08	R_2f7X9OTKeoWMKNr					39.974395751953	-86.077903747559	anonymous	4	4							4							2	1	1	1	1	1	5	5	5	1	United States	31	4	4	2	2	2
2017-01-08 13:18:04	2017-01-08 13:28:45	0	71.183.44.97	100	640	1	2017-01-08 13:28:46	R_RzsapiAcpefdDnr					40.623397827148	-74.028800964355	anonymous	4	6		It's easier for Women to delay contraception on their own. Help from the government should be in controlling the spread of Zika and the mosquitoes.			101		6		Again, it has to do,with what is a function of government and what is not. Governemnt cannot and should not control the actions of individuals but has a duty to protect its citizens through science.			188		7	7	7	7	7	6	2	2	2	2	American-uSA	65	6	3	2	2	1
2017-01-08 13:21:55	2017-01-08 13:29:19	0	173.68.144.50	100	443	1	2017-01-08 13:29:20	R_1oAy7fp5SFjhhA5					41.286407470703	-73.790802001953	anonymous	4	1	Prefer a method that limits population growth.		101				1	Because even if some people are just delaying pregnancy, it still seems that some pregnancies might be prevented altogether.		101				6	4	2	1	1	1	5	2	2	1	US	57	6	5	2	2	2
2017-01-08 13:04:09	2017-01-08 13:29:27	0	178.84.48.25	100	1518	1	2017-01-08 13:29:29	R_1oqh6NdGkE7c76H					52.351806640625	4.8585968017578	anonymous	4	6		This way, the number of children born will not differ much from periods when there was no Zika virus.			101		6		For the same reason as last time: it would be preferable to have every age represented equally.			101		4	3	2	4	2	2	5	2	2	1	Dutch	18	2	1	2	2	3
2017-01-08 13:14:30	2017-01-08 13:29:57	0	84.104.136.132	100	927	1	2017-01-08 13:29:59	R_CfTJoSNw2bgemOJ					51.588104248047	4.7754974365234	anonymous	4	6		contraception affects pleasure and is less likely to be used by the women + not to interrupt in their plans to procreate			126		6		same reasons as before (which partly match the reason provided by the survey)			126		2	5	5	6	6	6	4	4	4	2	/	28	6	5	2	2	2
2017-01-08 13:01:56	2017-01-08 13:30:18	0	209.93.158.1	100	1701	1	2017-01-08 13:30:20	R_XSpEssUDc9Z6Mzn					51.36669921875	1.13330078125	anonymous	4	3	Mosquito repellent is more inconvenient to use on a daily or hourly basis.		101	1			3	Issues related to the biting risk.		101	1			2	4	4	2	4	1	5	5	5	1	Romanian	32	5	2	2	2	2
2017-01-08 13:10:22	2017-01-08 13:30:29	0	81.40.194.245	100	1206	1	2017-01-08 13:30:30	R_1Cd5YdzyEBsTI5X					40.416702270508	-3.6838073730469	anonymous	4	7		Because it respects people's freedom to have babies whenever they want and Mosquito repellent doesn't interfere with anyone's believes so they are more likely to use it than contraception			101		7		Because it respects people's freedom to have babies when they want and also respects people's believes over the use of contraceptives. People against contraceptives will not use them but will use the repellent.			101		3	3	3	2	2	2	1	1	1	2	Spanish	25	6	3	2	2	3
2017-01-08 13:23:36	2017-01-08 13:30:32	0	68.173.48.227	100	415	1	2017-01-08 13:30:33	R_1jjHRmkzDOxdWh4					40.850402832031	-73.936897277832	anonymous	4	5		because we do not yet know the longterm effects of zila on the rest of the population, which also must be protected			918		4							4	4	4	1	1	1	2	2	2	2	USA	62	6	3	2	2	1
2017-01-08 13:17:05	2017-01-08 13:31:15	0	101.164.185.138	100	849	1	2017-01-08 13:31:18	R_3PWTaMK15Su6gPu					-33.842895507812	151.11068725586	anonymous	4	6		Because there needs to be space for people to have a choice. Perhaps they want to get pregnant, perhaps they can't take contraceptives for health or personal reasons.			998	1	6		I still think people should not be forced to rely on contraception.				1	6	6	6	4	5	3	3	3	3	2	Australian	46	6	1	2	1	2
2017-01-08 13:08:29	2017-01-08 13:31:26	0	68.11.33.24	100	1376	1	2017-01-08 13:31:27	R_2wBvnGjqZnFm8s6					30.002899169922	-90.103698730469	anonymous	4	5		Some women may have ethical concerns about contraception that would not be raised by repellent.			101		5		The same as before, it avoids the ethical concerns some women may have with contraception.			101		6	6	6	5	7	4	2	2	2	1	USA	65	5	1	2	2	1
2017-01-08 13:13:08	2017-01-08 13:31:36	0	78.99.157.82	100	1107	1	2017-01-08 13:31:37	R_1Lzs2mwk5TD8ePL					48.149993896484	17.11669921875	anonymous	4	5		Messing up with fauna and flora seems, due to my catholic tribe indoctrination, as a lesser evil choice.			101		5		Still the same. (you just phrased it much more interestingly)			140		5	2	3	3	2	2	2	2	2	1	Slovak	24	4	1	2	2	3
2017-01-08 13:19:19	2017-01-08 13:32:10	0	174.91.69.90	100	771	1	2017-01-08 13:32:11	R_3rVqXKyJz60auY6					43.592407226562	-79.761100769043	anonymous	4	7		Partly because I am opposed to artificial contraception on moral grounds. Also, because the mosquito repellant could prevent other diseases spread by mosquitos. Finally, the contraception solution seemed to be an attempt at social engineering through reproduction as it involved attempting to halt reproduction on a large scale (nationally) for an unspecified amount of time. The consequences of thi…				1	7		Because of my moral opposition to contraception and because I am opposed to the biological and social engineering (and its consequences) that are implied by the contraception solution.				1	7	7	7	4	2	3	2	2	2	1	Canadian	39	6	5	2	2	1
2017-01-08 13:17:04	2017-01-08 13:33:22	0	83.86.71.228	100	977	1	2017-01-08 13:33:23	R_ekVEbRjNwVXxIn7					52.083297729492	4.3000030517578	anonymous	4	5		It protects women who do not want to delay pregnancy. It protects fetuses instead of avoiding them.			125		5		Same as before. Protect women who don't want to delay pregnancy and their fetuses. (But ideally women should always have access to contraception.)			125		3	7	5	3	2	2	2	2	2	2	Usa	38	6	2	2	2	1
2017-01-08 13:18:28	2017-01-08 13:35:31	0	82.30.89.128	100	1022	1	2017-01-08 13:35:33	R_12JDulEoj9SgSv2					52.966705322266	-1.1667022705078	anonymous	4	5		Contraception is unreliable			101		2	I percieve the dekay in pregnancy as a safer snd more stable environment to have a child		200				6	7	7	5	4	3	2	2	2	2	British	31	5	1	2	1	3
2017-01-08 13:22:58	2017-01-08 13:36:55	0	62.107.93.65	100	836	1	2017-01-08 13:36:56	R_3RwsVIBrjiSa81Q					57.048004150391	9.918701171875	anonymous	4	7		If the repellent is just as effective as contraceptives there is no need to delay pregnancies.			101		7		If the woman thinks it is the right time to have a child, and Zika can be avoided by the repellent, then there is no reason to wait.			101		4	6	3	4	3	4	3	2	2	1	Danish	23	4	4	2	2	3
2017-01-08 13:27:27	2017-01-08 13:37:10	0	109.42.2.214	100	582	1	2017-01-08 13:37:11	R_1o5wiD3YFs0NnUQ					48.766693115234	9.1833038330078	anonymous	4	6		Does not interfere with a woman's wish to become pregnant			154		6					150		2	3	3	2	2	2	4	4	4	1	Germany	21	5	3	2	2	1
2017-01-08 13:21:30	2017-01-08 13:37:15	0	213.225.34.232	100	944	1	2017-01-08 13:37:16	R_3oWJY6rO7MLW3Im					48.152099609375	16.387802124023	anonymous	4	2	Contraception would be effective wherever the woman is. Using mosquito repellent would require ensuring all areas are sprayed with the risk that some would not be.		101				2	We shouldn't worry about the children who could possibly have been born.		101				4	5	3	4	2	2	4	4	4	2	British	58	5	1	2	1	3
2017-01-08 13:25:08	2017-01-08 13:37:52	0	82.37.86.237	100	763	1	2017-01-08 13:37:53	R_1ohWkRXPrhf4fIo					51.449996948242	-2.5832977294922	anonymous	4	7		From the information given, it seems that they are effective, except that the mosquito repellant gives couples more choice about when to conceive.			110		7		Same reasons as before - I'm unmoved by the argument about which child is born. It's better that Thomas is born healthy than Tania is born with microencephaly. All other things being equal, Thomas will have higher quality of life than Tania, so on the balance of probablities, we've improved the world by making this choice.			110		3	5	5	2	2	2	4	4	4	1	British	37	5	1	1	2	2
2017-01-08 13:18:45	2017-01-08 13:38:08	0	116.88.96.111	100	1162	1	2017-01-08 13:38:10	R_Due8cFvDVwSlimZ					1.2855072021484	103.85650634766	anonymous	4	7		People will still suffer the effects of the Zika virus if infected. Contraception violates the freedom of choice to have babies during this period.			501	1	7		Same reasons as before. Use of Repellent avoids suffering from the virus.			501	1	2	4	5	2	3	2	2	2	2	2	Singaporean	45	5	1	2	1	1
2017-01-08 13:23:43	2017-01-08 13:38:48	0	177.141.195.66	100	905	1	2017-01-08 13:38:49	R_QhURIfZPsKgMHTj					-23.473297119141	-46.665802001953	anonymous	4	5		Because mosquitos transport more diseases most of the times. So a prevention of the animal makes more sense to me			101		5		Because mosquitos transport more than only the zoka virus ro rhe people			101		4	4	7	2	2	2	2	2	2	1	German	26	6	3	2	2	1
2017-01-08 13:25:02	2017-01-08 13:39:13	0	207.177.28.232	100	850	1	2017-01-08 13:39:14	R_3MJxg3qy24nBeEE					43.147399902344	-95.142501831055	anonymous	4	5		Trusting people to effectively use contraception and assuming all believe it ia morally ok to use it is a big assumption.			105		5		Same as before, and the previous point about what babies are and arent born is at the very least, philosophically interesting.			105		6	3	3	2	2	1	2	2	2	2	USA	37	5	4	2	1	3
2017-01-08 13:22:56	2017-01-08 13:39:31	0	93.108.133.106	100	994	1	2017-01-08 13:39:32	R_yrlCDkdTkxacZrP					38.716705322266	-9.13330078125	anonymous	4	5		The cause of the problem should be the priority.			741		7		The cause of the problem should be the priority, while contraception will interfere with decision people make to have a child.			760		3	3	2	1	1	1	2	2	2	2	Portuguese	45	6	2	2	2	3
2017-01-08 13:36:42	2017-01-08 13:42:43	0	50.170.170.69	100	360	1	2017-01-08 13:42:44	R_yQo0HMwSkglqRcl					39.972106933594	-105.2492980957	anonymous	4	4							4							1	2	4	1	1	1	5	5	5	2	Usa	55	6	4	2	1	2
2017-01-08 13:36:39	2017-01-08 13:44:06	0	72.94.159.84	100	446	1	2017-01-08 13:44:07	R_0ey8TCYO7m0xvMZ					40.258804321289	-75.510398864746	anonymous	4	1	More likely to reduce the number of infants born with microcephaly		1000	1			1	It is still more reliable to prevent infants born with microcephaly		1000	1			1	1	4	1	1	1	5	4	5	2	United States	60	5	3	2	1	2
2017-01-08 13:31:31	2017-01-08 13:44:22	0	41.13.228.36	100	770	1	2017-01-08 13:44:24	R_PNDygdUu0KPeEI9					-29	24	anonymous	4	4							4							4	7	3	5	4	2	4	4	3	2	South african	24	5	4	1	2	2
2017-01-08 13:15:35	2017-01-08 13:45:08	0	41.13.56.103	100	1773	1	2017-01-08 13:45:09	R_2TYMBkeMX84EL50					-26.230804443359	28.058502197266	anonymous	4	7		It is ethically more correct and it is easier to give every woman or woman child repellent because surely contraception would only be given to adults leaving the younger girls vulnerable			1000	1	7		Because not all woman will be given contraception but everyone regardless their age will be given repellent			1000	1	1	4	3	1	1	1	5	3	3	2	South African	36	5	1	2	2	3
2017-01-08 13:11:33	2017-01-08 13:45:10	0	185.113.97.205	100	2017	1	2017-01-08 13:45:12	R_2wz3xFbhoO0FSI9					59.32470703125	18.055999755859	anonymous	4	5		I chose to fund Mosquito repellent over Contraception given that the two methods have as their premise two conflictual paradigms. Funding the Mosquito repellent considers the problem to be located, and rightly so, with the pathogen and its carriers, the mosquitos. Whereas Contraception yields to the conclusion that pregnancy is the problem under these circumstances. Hence, it gives a precedent wh…				1	5		I already provided my answer previously. The matter does not change for me, even if you introduce the gender dimension (or, call it the biological sex dimension).				1	4	4	6	1	3	3	2	2	2	1	Morocco	33	6	2	2	2	1
2017-01-08 13:34:12	2017-01-08 13:45:23	0	100.36.90.98	100	671	1	2017-01-08 13:45:25	R_1lnUwN0Gs76yPEW					39.096694946289	-76.877899169922	anonymous	4	6		It seems unfair to restrict woman from getting pregnant and some may decide to conceive anyway so the method would be ineffective.			250		6		Same as before, I don't like the idea of delaying pregnancy, for his long? There are always risks and it seems like an extreme solution.			488		4	3	3	2	2	2	2	2	2	2	American	27	5	1	2	2	2
2017-01-08 13:35:40	2017-01-08 13:45:37	0	88.133.176.67	100	597	1	2017-01-08 13:45:39	R_1179u9yGbBKXpEI					49.014297485352	12.142700195312	anonymous	4	4							6					101		4	4	3	2	2	2	3	2	3	2	Montenegro	32	6	3	2	1	2
2017-01-08 13:28:33	2017-01-08 13:47:36	0	196.143.137.9	100	1142	1	2017-01-08 13:47:37	R_3PUe09MSJ4yhzIL					30.077102661133	31.285903930664	anonymous	4	1	To reduce possibility of children born with disabilities, that if conceived at a later date, would not have said disability. It would be better for the country/government too, as there would be fewer people growing up with additional needs/finaicial support. It would also give the chance to focus entirely on getting rid of the mosquitos/virus rather than focusing on both that and treating sick ba…		1000				1	For the same reasons as previously stated. Whether or not it's the same person being born is a hypothetical situation. We cant predict who would have not been born and how that unborn person would have affected the world, eithrt negatively or positively. It is just a hypothesis similar to the butterfly effect. But using contraception would control the amount of babies being born with microcephaly…		1000				4	4	4	5	2	3	2	2	2	2	Souh African	31	5	1	2	2	2
2017-01-08 13:30:11	2017-01-08 13:47:38	0	24.13.47.238	100	1047	1	2017-01-08 13:47:39	R_3jditoPqRKm1F0l					42.06640625	-87.937301635742	anonymous	4	2	Safer for environment and people--less repellant is healthier.		501				2	Better for the environment and people--who wants to spray insect repellent all over pregnant women? I believe it is better simply to wait.		501				4	3	5	2	1	1	4	3	3	2	American	42	5	2	2	1	1
2017-01-08 13:40:07	2017-01-08 13:49:37	0	173.17.83.154	100	570	1	2017-01-08 13:49:39	R_UzFPTLM1vz7flh7					39.317993164062	-94.218002319336	anonymous	4	2				1			2				1			6	5	5	3	2	5	4	4	4	2	American	74	4	1	2	1	3
2017-01-08 13:29:46	2017-01-08 13:50:56	0	77.221.66.248	100	1270	1	2017-01-08 13:50:58	R_2S9tUYpuZ7hBLzj					54.683303833008	25.316696166992	anonymous	4	1	It is harder to control people's usage of repellents than it is to guarantee contraception.		190				1	Same reason as mentioned before.		190				4	1	1	2	2	2	5	4	4	1	Lithuanian	21	6	1	2	2	2
2017-01-08 13:33:24	2017-01-08 13:51:54	0	67.44.208.183	100	1108	1	2017-01-08 13:51:55	R_3gSmJEd9cPS8Lnk					36.165893554688	-86.784400939941	anonymous	4	5		It seems as though you eliminate a problem faster at the source. Human nature to forget to take/use contraception in all cases.			300		5		Larger impact for repellent.				1	2	2	3	3	4	3	4	3	4	1	US	58	4	2	1	1	2
2017-01-08 13:27:22	2017-01-08 13:52:20	0	77.221.66.248	100	1498	1	2017-01-08 13:52:21	R_2YrYBceS7ASKWoB					54.683303833008	25.316696166992	anonymous	4	4							4							4	1	2	1	3	3	5	3	5	2	Lithuanian	21	6	3	2	2	3
2017-01-08 13:39:12	2017-01-08 13:52:34	0	107.77.202.41	100	801	1	2017-01-08 13:52:35	R_2zv7F1EjDvlxmV5					38.905700683594	-76.978302001953	anonymous	4	3	not completely over, mosquito repellents have side effects as well. they are ecologically necessary		549				4							4	4	2	2	3	2	5	5	5	1	USA	38	5	1	2	2	3
2017-01-08 13:43:56	2017-01-08 13:52:52	0	101.186.226.84	100	536	1	2017-01-08 13:52:54	R_3kvRNUNUXDDzpUI					-31.967407226562	115.86209106445	anonymous	4	5		Because of the women who would have already conceived.			101		2	Because more babies would actually be prevented from having it and it is more proactive for the mothers.		101				5	4	4	1	1	1	5	3	5	2	Australian	56	6	1	1	1	2
2017-01-08 13:19:26	2017-01-08 13:54:31	0	96.37.20.187	100	2104	1	2017-01-08 13:54:32	R_XL2CEemkh2TRDJ7					35.568298339844	-82.627197265625	anonymous	4	5		Postponing a generation of babies could result in family problems down the road.			130		6		To not have a gap in generations and to avoid mothers being older while pregnant.			149		3	3	3	1	1	1	4	4	4	2	USA	35	5	2	2	1	3
2017-01-08 13:44:20	2017-01-08 13:56:34	0	99.255.239.165	100	733	1	2017-01-08 13:56:35	R_1pxwdL17Xzgm0Y3					43.418197631836	-80.445098876953	anonymous	4	2	It seems like the more environmentally friendly choice		343				2	It seems like the more environmentally friendly choice		266				3	3	3	1	1	1	2	2	2	2	Canadian	30	6	3	2	2	2
2017-01-08 13:43:12	2017-01-08 13:58:29	0	78.201.172.182	100	916	1	2017-01-08 13:58:30	R_1hYhdF1tiVcX1Ad					48.527694702148	2.0110931396484	anonymous	4	1	Leaves the decision as to whether delay pregnancy to each woman concerned. Politically: Reduces the scope of concern in the population to a smaller group of women.		150				1	The argument is flawed; it suggests that contraception is a form of eugenics (or a form of imposed social engineering), rather than a decision taken by each individual.		150				5	3	1	4	1	1	2	2	2	1	Polish	30	6	1	2	1	1
2017-01-08 13:43:29	2017-01-08 13:58:41	0	107.202.28.134	100	911	1	2017-01-08 13:58:42	R_1Ok5eGZPtp6Tujv					34.120697021484	-84.004402160645	anonymous	4	7		Same prevention of babies with microcephaly without effect on reproductive decisions.			101		7		Repellent prevents microcephaly as well without dictating reproductive choice.			101		1	1	1	1	1	1	5	4	5	2	American	50	4	1	2	1	2
2017-01-08 13:42:51	2017-01-08 13:59:59	0	217.43.22.229	100	1027	1	2017-01-08 14:00:00	R_Qoi5zMxac8bwfXr					51.73210144043	-1.206298828125	anonymous	4	3	I figured it would address the issue more directly, and there is less chance of it being used for anything/oneg else		101				6		Because, if they are both equally effective, and cost the same, then I think the next most important consideration is whether changes are being made to populations.			200		7	7	3	1	1	1	4	2	2	2	British	37	6	4	2	2	2
2017-01-08 13:33:22	2017-01-08 14:00:29	0	27.105.125.154	100	1626	1	2017-01-08 14:00:30	R_3NRiKoZ9t4NlVsc					24.143295288086	120.68139648438	anonymous	4	6		Unlike contraception, mosquito repellent enables the mothers to opt for pregnancy during the epidemic if they wish so.			101		6		For the same reason as before. The identity of the child does not matter.			101		1	1	1	1	1	1	4	4	4	1	Finnish	27	6	2	1	2	2
2017-01-08 13:39:58	2017-01-08 14:02:08	0	24.17.0.171	100	1330	1	2017-01-08 14:02:10	R_22yPmRfqYRg2aVq					47.382400512695	-122.31379699707	anonymous	4	7		People are going to want kids.			1000	1	7		People are going to have kids. They don't plan this....			1000	1	7	2	6	1	1	1	2	2	2	1	USA	54	3	1	2	2	2
2017-01-08 13:44:26	2017-01-08 14:05:20	0	89.98.73.12	100	1253	1	2017-01-08 14:05:21	R_33qLCc8xb9wXryl					51.439300537109	5.4591979980469	anonymous	4	2	Does not interfere with ecology. What position have those mosquitos in the web of life?		201				2	If both babies are equally healthy, what difference would it make?		202				1	2	2	2	2	2	2	2	2	1	Dutch	72	6	5	2	1	2
2017-01-08 13:50:05	2017-01-08 14:08:58	0	72.214.160.139	100	1133	1	2017-01-08 14:08:59	R_3Nx6biTqOtmtrTo					37.846694946289	-96.80549621582	anonymous	4	2	Concern regarding secondary/hidden toxic effects of repellents		110				3	environmental concerns regarding pesticide use. Also, I'm not opposed to delaying childbirth, again for environmental reasons (rasing generation time)		101	1			4	3	4	1	1	4	4	3	3	2	USA	51	6	5	2	2	3
2017-01-08 13:59:57	2017-01-08 14:10:04	0	2.24.56.189	100	607	1	2017-01-08 14:10:05	R_6omvFHbYGCUHTEh					50.716705322266	-2	anonymous	4	5		To ensure women still have the reproductive choice of when to conceive.			172		5		to ensure womens reproductive choice in tining of conception			101		7	7	7	1	1	1	2	2	2	2	British	50	6	4	1	1	1
2017-01-08 14:02:08	2017-01-08 14:10:17	0	96.29.140.97	100	488	1	2017-01-08 14:10:18	R_2zp5XfkuK8MXOWd					38.221694946289	-85.680000305176	anonymous	4	1	I don't know if the Zika virus remains in the body and for how long. So it's best to avoid becoming pregnant all together.		201				1	For the same reason listed before.		202				2	2	2	1	1	1	4	4	4	2	USA	42	6	3	2	2	2
2017-01-08 14:00:16	2017-01-08 14:10:47	0	73.80.32.61	100	630	1	2017-01-08 14:10:48	R_2sdpIBGufDrjxd8					39.423797607422	-75.257698059082	anonymous	4	6		More effective			101		6		because not everyone plans for pregnancy - contraception will only work for people who are trying to get pregnant, not for the ones who do so accidentally			101	1	5	3	3	5	5	3	5	5	4	2	irish	53	2	1	2	1	1
2017-01-08 13:22:08	2017-01-08 14:12:45	0	82.170.247.152	100	3037	1	2017-01-08 14:12:46	R_1hzjYgTNan29w3C					51.436706542969	5.4801940917969	anonymous	4	5		I have no ethical problem with contraception and even if I am note sure about the safety of the chemical used in the Mosquito repellent, I am not agree on forcing people not to get pregnant for a certain amount of time, thinking that this is can be a way of manipulating people life and might be more socially stressfull for those people.			701		6		for the same reason than before.			800		3	4	4	4	3	2	2	2	2	2	French	25	6	4	2	2	2
2017-01-08 14:02:52	2017-01-08 14:15:22	0	24.240.35.178	100	750	1	2017-01-08 14:15:24	R_9mKitkAemNk7a37					43.020797729492	-89.360000610352	anonymous	4	7		Not every one has the luxury to wait to have kids. People struggling with infertility can't often choose when they get pregnant and after struggling for years to make these people have to wait longer--indefinitely-- for Zika to no longer pose a treat is cruel.			1000	1	7		Same as before. The premise of this question assumes fertility can be controlled by everyone at all times. What if a woman was older? How could you ask that some to wait while her fertility declines?			839	1	4	4	4	2	2	1	4	2	4	2	Us	37	6	1	1	1	2
2017-01-08 13:53:21	2017-01-08 14:16:05	0	94.71.54.157	100	1364	1	2017-01-08 14:16:06	R_a96HcQObWz9aLYJ					37.983306884766	23.733306884766	anonymous	4	2	up to this moment I never even thought about mosquito repellent as a means to fight zika, so I chose contraception mainly because that was the option I already kwen about. Reflecting over both ooptions, I do feel that even though the question states that they are both equally effective, if I were a person under risk of contracting zika with all the reproductive consequences, firts of all I would …		101				2	If repellet were more effective than contraception and I were to decide for others, I would 100% fund repellent; it's not for me to force my personal preferences if they are not the most efficient option; howerver, I would still choose contraception if they were equally as effective; on one hand, I do not plan on having children myself, so the argument of one child never being born doesn't really…		104	1			6	4	5	6	3	4	3	3	3	2	russian	27	6	3	2	2	2
2017-01-08 13:56:58	2017-01-08 14:16:35	0	142.160.128.126	100	1176	1	2017-01-08 14:16:36	R_12G5LFxSncLlGyt					49.887603759766	-97.180702209473	anonymous	4	1	Effectiveness. It's more likely to get bitten by mosquitoes while using mosquito repellent than it is to become pregnant while using contraception.		101	1			2	Dousing an entire population in mosquito repellent would put a heavy load of additional pesticides into the environment			1			4	3	3	2	3	2	2	2	2	2	Canadian	36	5	3	2	2	2
2017-01-08 14:05:50	2017-01-08 14:17:09	0	67.0.250.144	100	678	1	2017-01-08 14:17:10	R_3OjBt5ZdTmeqeGx					35.149993896484	-106.57279968262	anonymous	4	1	Less chemicals are assumed to be in contraception.		151				1	Chemicals			1			4	3	3	2	2	1	2	2	2	2	White	41	5	3	1	1	3
2017-01-08 14:02:41	2017-01-08 14:19:41	0	135.23.211.141	100	1020	1	2017-01-08 14:19:43	R_D7D2M2i3MN17vj3					43.665496826172	-79.420402526855	anonymous	4	2	You'll never have a choice about whether or not a mosquito bites you, but you should have a say over if you get pregnant.			1			2	The need for mosquito repellent is urgent only right now; contraception is always important.		101	1			2	2	2	2	3	2	3	3	3	1	Canadian	50	6	5	2	1	3
2017-01-08 14:02:55	2017-01-08 14:20:22	0	89.15.239.69	100	1046	1	2017-01-08 14:20:23	R_UauAk7zeovi9ZTj					51.299301147461	9.4909973144531	anonymous	4	7		Less invasive in the intimate lives of people			101		7		Less invasive into the intimate lives of people			101		2	2	2	4	3	2	4	2	2	2	German	50	6	5	2	2	2
2017-01-08 13:53:44	2017-01-08 14:20:50	0	62.194.42.42	100	1626	1	2017-01-08 14:20:51	R_ezVL5tSRoEU9fDv					51.454299926758	5.4579925537109	anonymous	4	1			101				7					101	1	5	4	5	2	2	2	4	4	4	1	Colombian	28	5	1	2	2	1
2017-01-08 14:18:20	2017-01-08 14:24:02	0	24.55.43.209	100	342	1	2017-01-08 14:24:04	R_2uExIrUAuanSGiX					30.295501708984	-97.813301086426	anonymous	4	4							4							4	7	7	1	1	2	2	2	2	1	US	57	5	3	2	2	2
2017-01-08 14:11:04	2017-01-08 14:25:44	0	71.120.96.103	100	879	1	2017-01-08 14:25:45	R_eOKIkes54IeUesN					40.821792602539	-76.203498840332	anonymous	4	1	overpopulation in general, science does not have all the answers about zika at this time.can't kill mosquitos without also killing beneficial insects, works up the food chain.			1			2	same as before			1			4	4	3	3	2	1	5	5	5	2	American	65	5	3	2	2	1
2017-01-08 14:10:32	2017-01-08 14:26:04	0	37.203.93.116	100	932	1	2017-01-08 14:26:06	R_3EM9rjpVsmcbGL4					44.966903686523	15.943099975586	anonymous	4	5		Because it eradicates the mosquitoes and still leaves women with the free choice of having or not having children.			101		3	Because i dont find it a problem at all of deciding which babies will be born in the future as long as it is done through safe and moral ways.		158				1	2	5	3	2	2	4	3	4	1	Croatian	18	1	2	2	2	1
2017-01-08 14:17:00	2017-01-08 14:26:32	0	70.113.53.43	100	571	1	2017-01-08 14:26:33	R_3iWPwi1EACC4kt6					30.454895019531	-97.756500244141	anonymous	4	2	I think women would want it anyway.		191				2	I don't know, just seems like the better option		191				3	3	3	2	2	2	2	2	2	2	USA	40	6	1	2	2	1
2017-01-08 14:14:17	2017-01-08 14:28:38	0	88.83.22.150	100	860	1	2017-01-08 14:28:40	R_2fvXNOKC5G1WSVv					72	-40	anonymous	4	6		I am afraid contraception would not be used. It strongly depends on the sex culture in the country (or how common rape is), or in other words: how poor it is. I assume it's poor.			157		6		It does not matter that contraception changes which babies are born.			157		2	2	2	6	4	2	3	3	2	2	Danish	20	4	2	2	2	2
2017-01-08 14:04:02	2017-01-08 14:30:06	0	93.42.41.167	100	1563	1	2017-01-08 14:30:07	R_27VYMvjyqz7RSLS					37.776306152344	12.500900268555	anonymous	4	6		Because it's said to be as effective as the contraception but it let's women free to have the pregnancies they desiri			101		6		To let women free to have children When they desire to			101		2	2	2	2	2	2	5	3	5	2	Italian	41	5	3	2	2	2
2017-01-08 13:24:38	2017-01-08 14:32:41	0	91.127.173.80	100	4083	1	2017-01-08 14:32:43	R_RlD0KYJtv7VBUnn					48.149993896484	17.11669921875	anonymous	4	6		Considering the same cost and effectiveness, the usage of repellent does not take from people the choice of actually still having children			600		6		Same reason as the first time: Considering the same cost and effectiveness, the usage of repellent does not take from people the choice of actually still having children at the moment they want.			400		2	4	3	3	1	2	3	3	3	2	slovak	26	6	1	2	2	3
2017-01-08 14:26:08	2017-01-08 14:34:38	0	203.192.208.74	100	509	1	2017-01-08 14:34:40	R_3PyJiccnyYxDYEt					12.983306884766	77.583312988281	anonymous	4	6		Gives a choice to a woman to get pregnant			150		4							2	2	1	2	1	1	4	4	4	1	Indian	47	6	1	2	1	1
2017-01-08 14:24:42	2017-01-08 14:35:37	0	78.150.107.217	100	654	1	2017-01-08 14:35:38	R_2dMZyV0i2GOCN9S					52.25	-0.88330078125	anonymous	4	5		Women would be more likely to use it than contraception.			101	1	5		Same reason as before			101	1	2	3	3	4	4	3	3	3	3	2	British	57	5	2	2	1	3
2017-01-08 14:22:26	2017-01-08 14:36:15	0	200.104.137.152	100	829	1	2017-01-08 14:36:17	R_2qxhAABN83ybczw					-32.88330078125	-71.266700744629	anonymous	4	6		Contraception would decrease the amount of babys. In a small country like the example, that's no good.			200		6		sorry, my english isnt good enough, so i'll doit in spanish. Ambos bebés, pueden convertirse potencialmente en cualquier cosa, no hay diferencia entre ellos. Pero,me parece mucho mas práctico usar el repelente, si la mujere quiere tener un hijo ahora, que nada se lo impida.			170		6	3	2	3	3	2	3	3	2	1	Chilean	21	4	2	2	2	3
2017-01-08 14:11:39	2017-01-08 14:37:47	0	68.83.167.147	100	1568	1	2017-01-08 14:37:48	R_3Dvh38Gm8Zu4AXY					40.070098876953	-75.214500427246	anonymous	4	2	Contraception has other benefits, such as preventing unwanted pregnancy, some forms prevent already of STDs.		101				1	Women want to have more control over timing their pregnancy for other reasons then just Zika.		101				2	3	1	1	1	1	5	2	4	1	USA	26	6	1	1	2	2
2017-01-08 14:30:26	2017-01-08 14:37:58	0	107.77.195.216	100	451	1	2017-01-08 14:37:59	R_2dJZplARAkTrn0G					42.331405639648	-83.045700073242	anonymous	4	1	Repellent has a lot of chemicals that could be dangerous to a wider group of people.		508				1	Your scenario seems unscientific and emotionally coercive.		648				4	4	4	1	1	4	2	2	2	2	Usa	59	6	1	2	2	3
2017-01-08 14:21:05	2017-01-08 14:39:26	0	95.91.247.71	100	1100	1	2017-01-08 14:39:28	R_27IjLub3m2NTbYw					52.515502929688	13.406204223633	anonymous	4	6		Assuming, as was stated in the case, that the two methods are equally effective in preventing unwanted pregnancies, I consider contraception a more complex method, with higher risks for the person using it: most contraceptive pills also have unwanted, side hormonal effects, there is higher risk of depression etc; so if the person would only take contraception for the single purpose of avoiding a …			101		7		Again, if both are equally safe and effective, the Mosquito repellent allows the woman more choice: she can either decide to still have a baby, or postpone, but is not forced to chose for fear of the pregnancy risks. With contraception, she is basically forced to postpone pregnancy, even if she might want to become pregnant at an earlier time.			101		6	5	5	4	2	4	2	2	2	2	...	32	6	5	2	2	3
2017-01-08 14:25:42	2017-01-08 14:40:12	0	88.83.22.150	100	870	1	2017-01-08 14:40:13	R_2R7zVfG2DFjog0o					72	-40	anonymous	4	7		Contraception would also prevent healthy babies from being born.				1	7		Mosquito repellant prevents microencephaly, not babies.				1	4	3	7	7	7	7	3	3	3	1	Danish	48	5	2	1	1	3
2017-01-08 14:27:34	2017-01-08 14:41:14	0	78.48.119.79	100	820	1	2017-01-08 14:41:16	R_2VI4RubzFPGgl6w					51.180297851562	6.9472045898438	anonymous	4	5		120			240		6		Because it seems do have less of an effect on people's life, i.e. using Mosquito repellent doesn't change the family's life as much as delaying having a child would. In a nutshell, I chose liberty.			120		3	3	3	6	4	3	2	2	2	1	German	34	6	3	2	1	2
2017-01-08 14:30:32	2017-01-08 14:41:46	0	85.216.146.101	100	673	1	2017-01-08 14:41:47	R_1Ia2vn4IBS2CmHl					48.149993896484	17.11669921875	anonymous	4	2	Funding contraception also partially addresses overpopulation.		101				2	Same reason as before - it may reduce overpopulation.		101				4	4	4	1	1	1	5	4	4	1	slovak	36	6	1	2	2	2
2017-01-08 14:26:49	2017-01-08 14:43:03	0	83.58.192.89	100	973	1	2017-01-08 14:43:05	R_1n7ugDwAldpk97H					41.398406982422	2.1741027832031	anonymous	4	6		If they are both the same effective, I find it better to use repellent than to stop all the women from becoming pregnant for some period of time.			101		6		Same reason as before, I think I would prefer children to be born over contraception, assuming the are both effective the same way			101		2	6	5	3	3	3	4	4	4	1	Slovak	24	6	2	2	2	2
2017-01-08 14:30:49	2017-01-08 14:43:48	0	93.142.254.63	100	779	1	2017-01-08 14:43:50	R_5d88TPKExWtfD1v					46.304397583008	16.337799072266	anonymous	4	3	Because it enables freedom of choice for people		150				3	Because of freedom of choice for people		150				3	3	2	1	1	1	4	4	4	2	Croatian	23	2	2	2	2	2
2017-01-08 13:34:20	2017-01-08 14:44:41	0	80.56.92.36	100	4221	1	2017-01-08 14:44:42	R_74CL4DzvGB1wm2d					51.927093505859	4.4904937744141	anonymous	4	6		Contraception will prevent both potentially healthy babys and babys with microcephaly to be born, while repellent specifically prevents microcephaly. (there is nothing wrong with contraception, but i think the fact that people have the choice to have a baby during microcephaly outbreak makes the repellent a morally better choice).			101		6		The same answer als the last question: because the repellent allows the parents a (moral) choice to make children when they want to. Contraception will change which babyes will be born, but so does al lot of other factors. So that isn't the issue here. The simple fact that contraception will prevent having children for a certain time span and thereby limits freedom is the actual argument. It is h…			557		7	7	6	7	1	7	5	5	5	1	Dutch	26	6	5	2	2	2
2017-01-08 14:30:30	2017-01-08 14:46:45	0	85.74.154.95	100	975	1	2017-01-08 14:46:47	R_2rkX3HSoNrRQZRD					37.983306884766	23.733306884766	anonymous	4	7		You will always have women getting pregnant no matter what			101	1	7		since the baby girl never existed there is no point of being sentimental over a hypothesis			101	1	2	3	4	4	3	2	1	1	1	1	Greek	25	5	1	2	2	1
2017-01-08 14:40:11	2017-01-08 14:48:03	0	124.104.228.239	100	472	1	2017-01-08 14:48:03	R_cGy289VS71HrS0R					14.364700317383	121.05560302734	anonymous	4	1	humans are the scourge of earth			1			1	because fuck the mosquito repellent and contraception. the only solution here is to eradicate zika virus jesus christ. also, humans are the scourge of the earth.			1			1	1	1	1	4	1	5	5	5	1	filipino	19	5	1	2	2	2
2017-01-08 14:41:31	2017-01-08 14:48:07	0	190.164.53.114	100	395	1	2017-01-08 14:48:08	R_3oyWxcKWDjZVggG					-33.462493896484	-70.668197631836	anonymous	4	4							4							1	1	1	1	1	1	4	4	4	1	Chilean	26	6	3	2	2	3
2017-01-08 14:41:14	2017-01-08 14:51:27	0	107.77.194.85	100	612	1	2017-01-08 14:51:28	R_9vsvlX1A4aSr83L					42.175903320312	-83.480697631836	anonymous	4	1	Family planning options and the reduction of risk for mocrocephaly can both be addressed with contraceptives. Also better for the environment than spraying insecticide.		101				1	Family planning options and reduction of zika risk both addressed with contraception program.		101				7	4	3	4	1	1	2	2	2	2	American	32	4	3	2	1	2
2017-01-08 14:40:05	2017-01-08 14:53:17	0	94.123.227.127	100	791	1	2017-01-08 14:53:18	R_2qyEaGNMSCSjsxv					41.021392822266	28.968399047852	anonymous	4	1	Because it seems to be a better solution and also mosquitos will not be harmed.		200	1			1	You cannot argue that unborn babies have an interest to have been born, it would be a phallacy.		250	1			2	2	2	3	2	2	5	5	5	1	Turkish	28	6	5	2	2	2
2017-01-08 14:50:16	2017-01-08 14:55:44	0	174.109.86.179	100	327	1	2017-01-08 14:55:45	R_3CGVUvaPw0DN9Ak					35.995407104492	-78.901901245117	anonymous	4	2	Family planning is key to improving public health overall		509	1			2	Family planning is important to improving overall public health even when there is not an infectious disease outbreak		553	1			2	2	2	3	1	1	2	2	2	2	United States	43	6	3	1	1	3
2017-01-08 13:49:46	2017-01-08 14:55:57	0	73.133.213.125	100	3971	1	2017-01-08 14:55:59	R_d6J2Skq4onpPSql					39.28759765625	-76.592102050781	anonymous	4	7		Allows those affected--pregnant women--greater freedom of choice, assuming it is just as or more effective.			200		7		Same rationale as before--allows those potentially affected greater freedom of choice (to become pregnant or not). The matter of future persons changes nothing.			200		1	7	7	1	1	1	5	5	5	1	US	24	5	1	2	2	3
2017-01-08 14:34:02	2017-01-08 14:58:07	0	223.181.12.227	100	1444	1	2017-01-08 14:58:09	R_3PgxnS0sDIHh3fN					28.518905639648	77.213104248047	anonymous	4	5		Mosquito repellent will take care of mosquitos that cause other diseases also.			250		5		Hard to explain.			101		5	5	1	5	4	2	2	2	2	1	Indian	29	6	3	2	2	2
2017-01-08 14:37:45	2017-01-08 14:58:10	0	92.94.134.79	100	1225	1	2017-01-08 14:58:12	R_3epMfzjNr8boTCh					48.854400634766	2.4826965332031	anonymous	4	1	Because I prefer not to give birth to a abnormal child even if contraception is not that good for me either. This is a difficult choice anyway and in this world this is not easy.		1000				1	Do you know the consequences of mosquito repellent on the child development? Or mother's health in the future?		561	1			4	4	4	1	4	1	2	2	2	2	French	52	6	2	2	1	2
2017-01-08 14:51:55	2017-01-08 14:59:21	0	58.10.55.85	100	445	1	2017-01-08 14:59:23	R_qUiuWwAbiGVgntv					13.708297729492	100.45620727539	anonymous	4	2	Might also have other beneficial effects for women's lives, ie spacing of children, preserving gresojrces, globalhealth indicators		101	1			2	Same as first answer		266				6	5	5	1	1	1	3	3	3	2	Canadian	38	5	3	2	1	3
2017-01-08 14:52:04	2017-01-08 15:00:35	0	45.48.110.34	100	510	1	2017-01-08 15:00:36	R_yBWE0AubyGTBDI5					34.048797607422	-118.33999633789	anonymous	4	1	Less environmental risk associated with contraception v. pesticides.		200	1			1			200				1	1	2	1	2	1	4	3	4	2	American	29	4	3	2	2	3
2017-01-08 14:56:37	2017-01-08 15:00:44	0	71.187.163.250	100	247	1	2017-01-08 15:00:46	R_3MA6X4yBM839vNq					40.935104370117	-74.018997192383	anonymous	4	4							4							4	3	3	1	1	1	3	3	3	1	USA	57	4	3	1	2	2
2017-01-08 14:17:58	2017-01-08 15:00:59	0	172.56.14.10	100	2580	1	2017-01-08 15:01:00	R_ZFgWYw8W9LNA5kl					32.778701782227	-96.821701049805	anonymous	4	5		Forcing people to delay/stop reproduction is limiting their freedom, when an equally safe and effective alternative exists.			110		5		Esentially the same reason than in question #1.			110		3	3	3	2	2	2	5	4	4	1	Costa Rican	37	6	2	2	2	2
2017-01-08 14:50:36	2017-01-08 15:01:29	0	73.69.49.213	100	653	1	2017-01-08 15:01:31	R_1r2lF24poL9CqI5					41.286407470703	-72.795600891113	anonymous	4	2	Contraception is more reliable for this particular purpose, and will afford greater protection against fetal harm.		150				4							4	3	3	1	1	1	4	3	4	2	American	60	5	3	2	2	2
2017-01-08 14:28:34	2017-01-08 15:02:59	0	121.54.90.140	100	2065	1	2017-01-08 15:03:00	R_2fvbcyB3kp7qyoJ					14.595504760742	120.97210693359	anonymous	4	7		Contrception will fail in my place			140	1	6		Its effect is immediately felt			140	1	1	4	4	2	2	4	4	2	2	1	Filipino	54	4	1	2	1	2
2017-01-08 14:52:21	2017-01-08 15:03:24	0	82.43.128.7	100	662	1	2017-01-08 15:03:25	R_2D60q0KiiOcwV5J					53.533294677734	-2.61669921875	anonymous	4	5		Some people might be less likely to use contraception than repellent for various reasons (religion for example), some women get pregnant by accident. I felt that repellent was fairer because it didn't penalise those people.			101		5		Same reason as before.			101		6	6	3	1	1	1	2	1	1	2	British	37	4	1	2	1	2
2017-01-08 14:52:44	2017-01-08 15:03:30	0	1.128.96.113	100	646	1	2017-01-08 15:03:31	R_u7IdrwSo8RqCJnX					-27.473205566406	153.02151489258	anonymous	4	5		Enables pregnancy but reduces risk. Free choice really			101		5		Freedom of choice to have a baby is better			101		6	3	5	2	2	2	1	1	1	1	Australian	44	5	1	2	1	1
2017-01-08 14:42:43	2017-01-08 15:05:10	0	178.55.230.97	100	1346	1	2017-01-08 15:05:11	R_5tFbXEbkM83tKyl					60.175598144531	24.934204101562	anonymous	4	5		It seems a bit more of an ethical method.			101		5		It seems to be a bit more ethical			101		6	6	6	1	1	1	4	4	4	1	Estonian	38	5	1	2	2	3
2017-01-08 14:45:08	2017-01-08 15:05:50	0	94.197.121.70	100	1241	1	2017-01-08 15:05:51	R_ZI7ptqMm6i8eZt7					51.496398925781	-0.12240600585938	anonymous	4	6		If I chose contraception, pressure would be put on the women not to have babies. If they wanted to have a child when the outbreak was still going on, they might get blamed. Thinking about it now, I suppose there might be a similar issue with mosquito repellent, but something about contraception felt more like it'd be a problem when I made the choice, and I feel like that's significant.			295	1	6		Same reason as the first time. If the woman who had Tanya without contraception could have accessed it but didn't, that birth could be surrounded by blame and shame. I don't feel too strongly about whether it will be the same children being born or different ones, though.			343	1	7	7	4	2	3	4	2	1	1	3	British	23	5	3	2	2	3
2017-01-08 15:01:45	2017-01-08 15:06:47	0	73.69.49.213	100	301	1	2017-01-08 15:06:48	R_DdvDy53RF5G9ZN7					41.286407470703	-72.795600891113	anonymous	4	1			1000	1			1	Better for the world		750	1			2	1	1	1	1	1	5	4	5	1	American	80	6	3	2	2	3
2017-01-08 14:57:19	2017-01-08 15:06:55	0	76.124.185.210	100	576	1	2017-01-08 15:06:56	R_3J280CIk8GAUXw0					39.949401855469	-75.145698547363	anonymous	4	4							4							3	3	1	2	2	1	5	5	5	2	USA	36	5	1	2	2	3
2017-01-08 14:57:57	2017-01-08 15:07:41	0	94.145.69.25	100	583	1	2017-01-08 15:07:43	R_1lbfGIIuffawiyG					56.176895141602	9.7758026123047	anonymous	4	2	people are gonna use mosquito repellent anyway, because those fuckers are annoying no matter what disease they carry		280				2	There is a small chance that the woman will choose to not get a child altogether if she has time to think about it or something		280				1	1	2	3	2	4	4	4	3	3	Danish	18	2	1	2	2	2
2017-01-08 14:57:22	2017-01-08 15:08:01	0	84.245.120.199	100	639	1	2017-01-08 15:08:02	R_3exgDA4Taxw5cEX					48.666702270508	19.5	anonymous	4	7		I imagined that it should be primary responsibility of state to protect already pregnant women over preventing more pregnancies – these women are already at the risk of the virus, whereas the others can take preventive action themselves.			120		5		My reason stays the same.			120		6	5	4	3	2	6	3	3	3	1	Slovak	23	2	3	2	2	3
2017-01-08 15:00:38	2017-01-08 15:08:34	0	108.199.166.85	100	475	1	2017-01-08 15:08:35	R_2D8jO5bRY4cLf45					34.039596557617	-118.26609802246	anonymous	4	7		Because contraception is never 100% and eliminating the disease vector could be.			101		5		I still think eliminating the disease vector is a better option.			101		7	3	3	1	1	1	4	4	4	2	USA citizen	56	6	1	2	2	2
2017-01-08 14:59:20	2017-01-08 15:09:18	0	82.60.94.142	100	598	1	2017-01-08 15:09:19	R_3fqLsAdF31Id3h0					45.619995117188	8.9488067626953	anonymous	4	1	More useful all around		200				1	It does not matter which babies are born in the future as long as they are equally healthy		200				4	3	3	2	6	2	4	4	4	2	Italy	47	6	2	2	2	2
2017-01-08 15:03:12	2017-01-08 15:09:41	0	60.228.79.132	100	388	1	2017-01-08 15:09:42	R_3Mip9scnWwgJshO					-32.02490234375	115.80200195312	anonymous	4	1	Seems to me it would be more effective		150				4							4	4	4	4	4	4	2	2	2	2	Australian	47	5	1	2	1	2
2017-01-08 14:58:30	2017-01-08 15:09:45	0	52.119.98.2	100	674	1	2017-01-08 15:09:46	R_2dRCxHtz20ty7jA					43.079605102539	-89.375801086426	anonymous	4	5		I presume contraception would not be very effective because there would be people who want to have babies anyway			101		4							2	2	2	3	3	1	5	4	4	1	USA	22	5	4	1	2	3
2017-01-08 15:03:26	2017-01-08 15:09:48	0	209.226.201.241	100	382	1	2017-01-08 15:09:50	R_3p4sMZviEnmZA1j					43.666702270508	-79.416702270508	anonymous	4	1	It has additional benefits in addition to preventing Zika		554				1	More benefifs		552				3	2	3	3	3	2	4	4	4	2	Canadian	20	2	3	2	2	3
2017-01-08 15:01:17	2017-01-08 15:11:41	0	107.77.206.53	100	623	1	2017-01-08 15:11:42	R_1IuZ3BOvHkuZfc8					38.57829284668	-90.666603088379	anonymous	4	5		Mosquito repellent could benefit more people other than birth control.			101		4							4	3	5	1	1	1	3	3	3	2	United States	43	3	2	2	1	2
2017-01-08 15:00:26	2017-01-08 15:13:04	0	2.25.15.136	100	757	1	2017-01-08 15:13:05	R_RCvCdR7mmDePIE9					55.846603393555	-3.1927032470703	anonymous	4	1	Women should have the right to choose if and when they become pregnant		250				1	The 'different babies born' argument is a fallacy. A 'different baby' could be conceived if a woman gets pregnant at 12:00 instead of 12:01 on the same day. It's also talking about hypotheticals - if baby A isn't born but baby B is, then there's no ethical or moral dilemma concerning baby A because baby A doesn't and never did exist.		250				5	4	3	2	2	2	2	2	2	1	British	38	6	2	2	2	2
2017-01-08 15:10:01	2017-01-08 15:13:24	0	92.21.37.114	100	203	1	2017-01-08 15:13:25	R_pFPL0A7fUxSeP4Z					51.816696166992	-0.80000305175781	anonymous	4	4							4							2	2	2	2	2	2	4	4	4	2	uk	25	6	3	1	2	2
2017-01-08 14:36:02	2017-01-08 15:13:53	0	112.198.102.79	100	2271	1	2017-01-08 15:13:56	R_rkXdjPSVxpRXhZL					14.595504760742	120.97210693359	anonymous	4	4							5		Doesn't change the baby			101		1	1	1	1	1	1	2	2	2	2	Filipino	20	4	3	2	2	3
2017-01-08 14:57:32	2017-01-08 15:15:09	0	112.198.118.136	100	1057	1	2017-01-08 15:15:09	R_86rtRIEeiFyngz3					14.595504760742	120.97210693359	anonymous	4	1	I think contraception is more effective. Repellents can fail.		101				4							2	2	2	3	2	1	4	4	3	2	Filipino	19	4	4	1	2	3
2017-01-08 15:00:20	2017-01-08 15:15:38	0	177.247.184.72	100	918	1	2017-01-08 15:15:39	R_1j9V1EsjXayV4r2					20.935592651367	-100.74810028076	anonymous	4	7		It is less coercive and interferes less with normal life			198		7		The same reasons as before			200		4	3	3	1	1	1	4	4	4	1	Canadian	79	4	1	2	1	2
2017-01-08 14:34:52	2017-01-08 15:16:36	0	82.13.114.72	100	2503	1	2017-01-08 15:16:37	R_26bVQQwyc53N7cP					51.625305175781	-4.0346069335938	anonymous	4	6		Mosquito repellent should protect those women already pregnant as well as those who may become pregnant in future. Furthermore, those who already do not take contraceptives for their own reasons will not have to compromise. (the second question, ie the one below, does not solve this conundrum as contraceptive cannot protect babies already conceived.)			191		6		I suppose the mosquito repellent allows the mother more flexibility as to when she can safely conceive (ie whenever mosquito repellent is effective). I did notice however that the phrasing of the question suggested that by delaying pregnancy via contraceptive you are tampering with some kind of set path, which irritated me. Should such a thing exist, whichever baby was born would presumably equal…			191		6	6	4	2	3	2	4	4	4	2	Welsh British	24	6	3	2	2	1
2017-01-08 14:59:18	2017-01-08 15:16:51	0	73.13.191.67	100	1053	1	2017-01-08 15:16:53	R_50cJwMzrzg7apvb					40.184295654297	-75.216796875	anonymous	4	3	Mosquito repellent only stops one thing. Contraception also helps prevent the spread of other diseases.		200				3	The world is full of random interactions that create vastly different outcomes. I think it is silly to raise a hypothetical outcome that having one healthy child over another in the world is better in some way.		203				4	3	5	1	1	3	4	4	4	2	United States	40	6	3	1	2	2
2017-01-08 15:11:46	2017-01-08 15:19:42	0	80.213.2.165	100	476	1	2017-01-08 15:19:44	R_6fZApixhGpb8Y0h					60.393005371094	5.3242034912109	anonymous	4	4							4							3	3	2	3	2	2	2	2	2	2	Macedonian	37	6	2	2	2	2
2017-01-08 15:13:04	2017-01-08 15:19:42	0	99.254.183.87	100	398	1	2017-01-08 15:19:44	R_2EELf69fHWh68qc					44.043304443359	-79.491203308105	anonymous	4	4							4							3	3	2	2	3	1	2	2	2	2	canadian	29	2	2	2	1	3
2017-01-08 13:23:11	2017-01-08 15:20:24	0	201.246.22.18	100	7033	1	2017-01-08 15:20:25	R_8pIfP3k9Oq0K8xn					-33.437805175781	-70.650299072266	anonymous	4	7		It is an easier life change to adopt			101		7		Does effectivity include applicability? Repellant for applicability. Attitudes toward sex are hard to change.			101		7	5	7	1	2	3	5	5	5	1	Chilean	23	4	1	2	2	3
2017-01-08 15:14:32	2017-01-08 15:23:49	0	97.96.114.87	100	557	1	2017-01-08 15:23:51	R_30wOM1DbJWeB7S0					27.437301635742	-82.577499389648	anonymous	4	5					101		5					101		2	2	2	1	1	1	5	5	4	1	United States	29	6	2	2	2	2
2017-01-08 15:13:36	2017-01-08 15:25:50	0	68.9.129.46	100	734	1	2017-01-08 15:25:52	R_bg6KHj0xFeptXUJ					41.505905151367	-72.908096313477	anonymous	4	5		many people are against contraception. Nobody hates mosquito repellant			201		6		encouraging delayed pregnancy is, to some extent, a way to control populations, and can be used selectively to reduce numbers of less desired classes of people			201		4	3	6	2	2	2	2	2	2	1	caucasian	70	6	3	2	1	2
2017-01-08 15:15:13	2017-01-08 15:26:44	0	109.98.160.224	100	690	1	2017-01-08 15:26:45	R_1jJTdlng0SdARm6					44.433303833008	26.100006103516	anonymous	4	7		I find it not ethical to impose STOP for conception. I am thinking that this might have long term implication at the economical level. PLUS is something I can do and check is done rather then the other case				1	7						1	3	7	3	2	6	2	4	3	3	2	Romanian	44	6	1	2	2	1
2017-01-08 14:59:39	2017-01-08 15:28:38	0	189.217.164.51	100	1738	1	2017-01-08 15:28:39	R_3JqtKiFytADwyJk					19.434204101562	-99.138603210449	anonymous	4	7		You can prevent people being sick, applies for all the population				1	7		Same reason as before, its about people not geting sick, not about babies				1	4	4	3	1	1	1	2	2	2	2	Mexican	41	6	2	2	2	1
2017-01-08 15:21:13	2017-01-08 15:28:54	0	83.78.5.6	100	460	1	2017-01-08 15:28:55	R_9AyG9iTzPNbbpyV					46.195205688477	6.1436004638672	anonymous	4	3	Contraception is a defensive measure. Mosquito repellent has side effects, such as microcephaly.		218	1			1	Mosquito repellent is the wrong answer.		856	1			7	6	6	3	3	4	2	2	2	1	Swiss	50	5	3	1	1	2
2017-01-08 15:22:28	2017-01-08 15:29:07	0	73.9.100.101	100	399	1	2017-01-08 15:29:08	R_vZDgQMMkoVItyBr					41.801406860352	-87.60050201416	anonymous	4	1	Additional benefit to women's quality of life		213				1	Additional benefit to women's quality of life		284				3	2	3	1	1	1	3	3	3	2	USA	75	6	3	1	2	1
2017-01-08 15:22:26	2017-01-08 15:31:44	0	78.133.89.174	100	558	1	2017-01-08 15:31:46	R_xzmiI85aneCh5Tj					35.909194946289	14.425598144531	anonymous	4	5		Zika threatens pregnancy. The issue to solve is to ensure safe pregnancy. Contraception prevents pregnancy. Mosquito repellent does not prevent pregnancy but keeps it safe.			101		6		Issue is that of safe pregnancy. Mosquito repellent ensures that. Contraception simply prevents pregnancy.			101		2	7	7	2	2	2	2	2	2	1	Maltese	41	6	3	1	2	3
2017-01-08 13:42:08	2017-01-08 15:32:15	0	70.81.92.20	100	6606	1	2017-01-08 15:32:17	R_1n3CJHkX4vLM8bq					45.506301879883	-73.629699707031	anonymous	4	2	Mosquito repellent has a much larger chance of not perfectly working and the habit of spraying it multiple times a day would be harder to form than taking a pill a day.		101				4							2	2	3	2	2	1	5	5	5	1	Candadian	23	6	2	2	2	3
2017-01-08 15:23:56	2017-01-08 15:35:26	0	151.230.25.50	100	690	1	2017-01-08 15:35:28	R_2wpN5Pf1kk58WSP					54.066696166992	-2.8500061035156	anonymous	4	3	Because contraception gives people the choice over whether to undertake a risky pregnancy.		101				3	I don't think it matters that different babies will be born as the combination of genes is unpredictable anyway, and prefer that people can choose when to become pregnant.		101				4	3	5	3	2	2	2	2	2	2	British	37	6	1	2	2	2
2017-01-08 15:12:06	2017-01-08 15:36:55	0	105.186.105.228	100	1488	1	2017-01-08 15:36:56	R_3DcJZYm9NUKDRyp					-25.706893920898	28.229400634766	anonymous	4	6		I want to protect the women already pregnant			101		6		Some people would still choose to get pregnant			101		4	2	2	4	2	2	2	2	2	2	RSA	30	5	3	2	1	2
2017-01-08 15:13:46	2017-01-08 15:37:27	0	75.130.203.52	100	1421	1	2017-01-08 15:37:28	R_V4qkXPkCRFEnj8J					35.589996337891	-82.558097839355	anonymous	4	1	With mosquito repellant, there's the chance of harmful chemicals affecting pregnancies, depending on what type of repellant was used. The effective methods may contain teratogens which affect fetal development, whereas contraception (while slightly unfair to ask people to delay pregnancy) ensures a safer pregnancy later on.		191				4							6	5	3	1	1	1	4	3	4	2	Swiss	24	4	3	2	2	3
2017-01-08 15:28:26	2017-01-08 15:38:21	0	65.25.215.38	100	595	1	2017-01-08 15:38:22	R_1Cw01fPAiYrI0ES					44.338500976562	-88.404197692871	anonymous	4	4							4							4	3	3	5	5	3	4	4	2	1	American	22	5	3	2	2	3
2017-01-08 15:24:14	2017-01-08 15:40:01	0	78.201.172.182	100	946	1	2017-01-08 15:40:03	R_3GjQTRCTqF01yTW					48.527694702148	2.0110931396484	anonymous	4	6		Some women can get pregnant or wish to get pregnant anyway, so the option with repellent is not discriminatory.			126		6		Non-discriminatory for already expecting women.			156		6	4	4	5	6	4	2	2	2	2	Polish/French	27	6	3	2	1	1
2017-01-08 15:32:26	2017-01-08 15:42:53	0	111.253.88.178	100	627	1	2017-01-08 15:42:56	R_2TvLUeH8QM50bbg					24.143295288086	120.68139648438	anonymous	4	2	Contraception is less prone to failure		530				2	Does not matter which babies are born as long as they are healthy		432				6	5	5	2	1	1	2	2	2	2	Singaporean	32	6	1	2	1	2
2017-01-08 15:31:45	2017-01-08 15:44:22	0	92.24.214.42	100	757	1	2017-01-08 15:44:23	R_27pxJPIvxNZIMFS					50.899993896484	-1.3999938964844	anonymous	4	3	the added benefits of population control		101				3	because the statements you made about the future are nonesense. The future hasn't happened yet and we can't make definitive statements about who will be born		101				3	3	4	1	1	1	5	5	2	1	uk	51	6	1	2	1	2
2017-01-08 15:28:21	2017-01-08 15:45:35	0	213.205.198.107	100	1033	1	2017-01-08 15:45:36	R_1pFCuHMomH0URWV					51.766693115234	-0.16670227050781	anonymous	4	3	Benefits all women		502				2	Think different baby being born is irrelevant		500				2	4	6	5	5	2	2	2	2	2	British	43	5	3	2	1	3
2017-01-08 15:39:28	2017-01-08 15:53:03	0	87.92.212.12	100	814	1	2017-01-08 15:53:04	R_u2587DyIW8garUB					60.449996948242	22.283294677734	anonymous	4	4							4							2	3	2	3	3	2	4	4	4	1	Finnish	27	7	2	1	2	3
2017-01-08 15:51:06	2017-01-08 15:55:22	0	212.235.16.21	100	255	1	2017-01-08 15:55:24	R_1inD6iIxtEbdiWR					31.5	34.75	anonymous	4	2	Contraception can be used more widely than just preventing Zika and can be difficult or expensive to access		101				2	Contraception has wider applications!		101				1	1	1	1	1	1	2	2	2	2	British	20	4	1	2	2	2
2017-01-08 15:21:17	2017-01-08 15:55:36	0	209.52.88.69	100	2059	1	2017-01-08 15:55:37	R_2SralfuhnS1genq					49.25	-123.13330078125	anonymous	4	2	It favours a reduction in birth rates.		300				1	It provides the opportunity to reduce birth rates into the future.		301				3	3	6	1	1	1	4	4	4	1	Canadian	56	2	1	2	2	2
2017-01-08 15:50:50	2017-01-08 15:57:40	0	75.128.21.63	100	409	1	2017-01-08 15:57:41	R_6VfAxMzWjXNrqhP					35.256500244141	-120.62139892578	anonymous	4	2			101				4							6	6	7	2	2	2	2	2	2	1	American	18	4	2	2	2	3
2017-01-08 15:45:28	2017-01-08 15:58:18	0	176.249.100.155	100	769	1	2017-01-08 15:58:20	R_2D8lNXEEUy8wdkR					51.404602050781	-0.25079345703125	anonymous	4	3	Mosquito repellents do not often work and wear off requiring constant reapplication. Depending on the type of contraception i.e. A monthly injection, it could lead to less cases as there is less chance of human error in terms of forgetting repellent, having to reapply etc.		101	1			3	Same reasons as before: whilst in theory both methods are as effective, the repellent requires more effort and is open to greater human error.		101	1			3	3	4	2	4	4	4	4	4	2	Scottish	36	6	3	2	1	3
2017-01-08 15:17:37	2017-01-08 15:58:33	0	173.88.200.23	100	2456	1	2017-01-08 15:58:33	R_6xHl7Gh3zZvlgGN					40.899597167969	-81.439598083496	anonymous	4	4							4							2	2	2	2	2	2	2	2	2	1	American	26	4	3	2	2	2
2017-01-08 15:45:44	2017-01-08 15:58:44	0	67.240.2.116	100	780	1	2017-01-08 15:58:46	R_21cWCyw9eIo0Bbh					42.96940612793	-74.122398376465	anonymous	4	2	Mosquito repellent has an effect on the environment which can effect everyone, contraception only effects the one taking it.		1000	1			2	Contraception only effects the person taking it. Mosquito Repellent can effect the environment which effects us all.		1000				1	1	1	2	1	2	5	4	5	2	Whute	57	3	2	2	1	2
2017-01-08 15:44:29	2017-01-08 15:58:45	0	98.234.60.84	100	856	1	2017-01-08 15:58:48	R_4TPkZb2IFfrRzqh					37.678604125977	-122.47639465332	anonymous	4	4							4							3	3	3	1	1	1	4	3	2	2	American	51	5	1	2	2	2
2017-01-08 15:45:48	2017-01-08 16:02:51	0	70.195.88.99	100	1023	1	2017-01-08 16:02:53	R_3FJqR46aIydEEub					38.440704345703	-90.209503173828	anonymous	4	7		Human behavior is harder to change than killing mosquito			101		7		All things being equal, easier to spray and know than to expect humans will use contraception or choose to delay pregnancy			101		3	4	5	3	4	3	5	4	4	1	USA	37	5	1	2	1	1
2017-01-08 13:56:31	2017-01-08 16:04:02	0	79.70.176.60	100	7651	1	2017-01-08 16:04:03	R_33l3GTBNkgy2QHy					54.945007324219	-1.6174926757812	anonymous	4	6		So people can continue to have healthy babies			101		7		It doesn't matter which babies are born. But delaying pregnancy does affect lives.			101		3	3	3	1	2	2	2	2	2	2	British	46	6	1	2	2	2
2017-01-08 15:55:14	2017-01-08 16:04:39	0	47.51.196.3	100	564	1	2017-01-08 16:04:40	R_1pMftuAiOXXEteF					32.725402832031	-97.32080078125	anonymous	4	2	The added benefit of avoiding extra pregnancies		270				2	The future is always in flux		571				6	5	5	2	2	3	2	2	2	1	Usa	46	4	2	2	1	1
2017-01-08 14:38:56	2017-01-08 16:04:52	0	107.77.224.18	100	5155	1	2017-01-08 16:04:54	R_2y9rOaeVqN4SOHx					40.820297241211	-73.987098693848	anonymous	4	1	Because fewer overall lives are lost through contraception, if you assign equal weight to the life of a mosquito, or more weight than you might at first thought		601				1	the future baby hypothesis doesnt sway me in the least		603				7	7	7	2	6	2	2	2	2	2	American	46	4	1	2	1	1
2017-01-08 15:52:09	2017-01-08 16:05:07	0	98.206.226.101	100	778	1	2017-01-08 16:05:09	R_VVGqjDoKdSxNkVH					41.47380065918	-87.837699890137	anonymous	4	1	It will not cause the harm that mosquito repellent will.		500	1			1	What is it you are trying to imply about babies in the future? Are you saying that those babies somehow have the power to change the future just by being born? There is no way to know that.			1			4	6	4	1	1	1	2	2	2	1	American	64	2	1	2	2	2
2017-01-08 15:59:55	2017-01-08 16:05:42	0	72.93.85.160	100	347	1	2017-01-08 16:05:44	R_uexS54RmEnnLpfP					42.416595458984	-71.146896362305	anonymous	4	3	Contraception is more reliable and takes less thought than reapplying repellant every few hours.		101				4							7	6	2	2	2	1	3	3	3	2	American	33	5	3	2	2	2
2017-01-08 15:58:03	2017-01-08 16:06:31	0	67.11.39.129	100	507	1	2017-01-08 16:06:33	R_VJZX4Ra56aYnDEZ					29.503997802734	-98.668197631836	anonymous	4	1	I chose contraception because it gives choice to the individual a rather than spraying an entire population with chemicals		1000				1	I still believe it should be an individuals choice			1			4	3	3	3	2	1	3	3	3	2	American	38	5	2	2	1	2
2017-01-08 15:36:57	2017-01-08 16:08:03	0	188.129.70.23	100	1865	1	2017-01-08 16:08:04	R_1qWWBU2Kay7OqjJ					45.733306884766	15.966705322266	anonymous	4	5		Because Mosquito repellent prevent the disease, and Contraception prevent one consequence of disease			101		4							3	3	6	6	5	6	4	3	4	2	Croatian	53	6	5	1	1	2
2017-01-08 15:46:21	2017-01-08 16:08:10	0	89.70.148.7	100	1309	1	2017-01-08 16:08:12	R_2eQllVwea7WX14t					51.100006103516	17.033294677734	anonymous	4	3	I imagine that contraception is safer, because the woman don't have to remember about mosquitos.		190				5		Sometimes becoming pregnant is not easy. Waiting for baby may last not 1 month, but years.			105		7	5	4	1	1	1	3	3	3	2	Polish	45	2	5	2	2	3
2017-01-08 15:59:56	2017-01-08 16:09:54	0	108.180.203.123	100	597	1	2017-01-08 16:09:55	R_1pnVWFDkRV1h34D					49.463500976562	-122.82199859619	anonymous	4	5		So as not to dictate when women decide to have children.			299		6		So as not to dictate when women decide to become pregnant.			299		4	4	3	2	2	2	2	2	2	2	Canadian	23	5	1	2	2	2
2017-01-08 16:02:45	2017-01-08 16:10:39	0	86.175.249.153	100	474	1	2017-01-08 16:10:41	R_2AGqHVydEWkEmDZ					51.496398925781	-0.12240600585938	anonymous	4	4							4							6	6	4	2	2	2	2	2	2	2	English	35	6	3	2	2	2
2017-01-08 15:52:55	2017-01-08 16:15:44	0	141.0.13.7	100	1369	1	2017-01-08 16:15:46	R_5goQyjypSaa5ZFT					59.949996948242	10.75	anonymous	4	7		it would be difficult to convince people to use contraception as compared to creating awareness and teaching on the use of the repellant.				1	7						1	2	3	3	2	1	1	4	4	4	2	kenyan	26	5	1	2	2	1
2017-01-08 16:09:02	2017-01-08 16:16:19	0	207.38.146.226	100	437	1	2017-01-08 16:16:21	R_3gLDq4dzwTb7aJW					40.725204467773	-73.980201721191	anonymous	4	5		i think women would be more likely to use repellant			101		7		less effects on future			101		3	2	3	3	2	2	3	3	3	2	American	43	6	1	2	1	1
2017-01-08 16:03:53	2017-01-08 16:20:05	0	81.193.208.135	100	971	1	2017-01-08 16:20:06	R_1FlcNICOZZpBNVo					38.679000854492	-9.1569061279297	anonymous	4	7		Because contraception would not help women who are already pregnant. Also, I don't know how long it will take untill the outbreak passes. So I am not sure if postponing pregnancies would be a good solution for both women/couples in particular and for the country.			150		7		For the same reasons as before.			150		6	6	6	3	2	3	2	2	2	2	Portuguese	29	6	2	2	2	2
2017-01-08 16:03:24	2017-01-08 16:21:10	0	75.133.165.190	100	1066	1	2017-01-08 16:21:11	R_3KZpKSQqenWDloY					38.702896118164	-93.236801147461	anonymous	4	6		I think people will be more likely to use the mosquito repellent.			101	1	6		I don't know that the risk of Zika will be reduced in the future, but even if it was, I think people would be more likely to use the repellent and it would therefore be a more effective strategy. I don't see any relevance to the delay in pregnancy leading to a different combination of egg and sperm, unless you factor in parental age being associated with increased risk of birth defects.			101	1	3	3	3	2	3	2	4	3	4	1	USA	37	6	3	2	1	1
2017-01-08 16:13:49	2017-01-08 16:24:07	0	67.49.3.105	100	618	1	2017-01-08 16:24:09	R_2qfR3XNpVXMTs9P					33.720703125	-116.216796875	anonymous	4	4							4							5	3	3	7	2	2	3	2	2	2	Canada	55	5	1	2	1	1
2017-01-08 16:10:33	2017-01-08 16:24:44	0	82.9.121.231	100	850	1	2017-01-08 16:24:46	R_2xxWpjpbWuyyJSL					50.899993896484	-1.3999938964844	anonymous	4	6		It would enable women to become pregnant, should they choose to do so.			147	1	6		As before: enables choices about pregnancy to remain with the woman.			148	1	6	5	3	2	2	2	2	2	2	2	British	57	5	4	1	1	2
2017-01-08 15:57:11	2017-01-08 16:26:17	0	101.50.114.97	100	1746	1	2017-01-08 16:26:19	R_1LprIhyIwFDrj4U					33.695693969727	73.011306762695	anonymous	4	5		Although we assumed they are both effective and safe, I know in reality Contraception may have undiscovered harm on my lady so I wont promote it.			101		6		I have a belief that influenced this choice. We need not concern with if this or that. Whoever has to be born is destined. But let it be also understood that one must not concern with destiny and do our best.			101		3	4	5	2	1	1	5	5	1	1	Afghan/Pakistani	20-21, I stopped counting	4	2	2	2	1
2017-01-08 16:14:33	2017-01-08 16:28:24	0	78.23.165.194	100	831	1	2017-01-08 16:28:25	R_1CHdz9lLOPvq4mi					51.166702270508	4.13330078125	anonymous	4	7		Also protects women who are already pregnant			101		5		This description made me consider the effect of contraception on the population effect. I do not know whether the country actually needs less or more citizens, so I slightly preferred the repellent to have as little effect on population growth as possible.			101		2	1	3	1	1	1	5	5	5	1	Belgian	25	6	3	2	2	2
2017-01-08 16:18:07	2017-01-08 16:29:23	0	108.4.0.91	100	676	1	2017-01-08 16:29:24	R_2E11wBgfqLyWmaA					37.444900512695	-77.298301696777	anonymous	4	1	A woman's access to contraception is something I find very important. The use of synthetic pesticides is something I advocate against.		101	1			1	The effects of the repellent will affect Tanya and the earth she inherits.			1			7	6	4	1	2	2	2	2	2	2	American	30	6	3	2	2	3
2017-01-08 16:24:02	2017-01-08 16:32:05	0	50.159.90.20	100	482	1	2017-01-08 16:32:06	R_2s0Fdla2eg0klK0					47.942199707031	-122.23979949951	anonymous	4	2	Prevent pregnancy in the first place.		101				2	Different babies in the future does not change the argument at all for me. Preventing pregnancy is still the goal.		562				1	1	1	1	1	1	5	4	4	2	USA	31	6	5	1	2	2
2017-01-08 16:14:42	2017-01-08 16:32:15	0	104.162.129.31	100	1053	1	2017-01-08 16:32:17	R_2viCY4v16GfcQSY					40.723495483398	-73.861198425293	anonymous	4	1	Mosquito repellent may not be 100% effective		500	1			1	In human terms it does not matter which baby is born as long as it is 200% sure that it is healthy		500	1			4	4	4	4	4	4	5	4	5	2	USA	38	6	3	1	1	1
2017-01-08 16:29:37	2017-01-08 16:35:34	0	90.208.22.183	100	357	1	2017-01-08 16:35:35	R_323eJRRxa9XGnOY					51.559692382812	0.07080078125	anonymous	4	4							4							2	2	7	4	4	6	4	3	4	2	British	26	6	5	1	2	2
2017-01-08 16:21:58	2017-01-08 16:36:11	0	81.108.68.203	100	853	1	2017-01-08 16:36:13	R_1dBq0k2r8ViLx8S					51.805801391602	-0.80599975585938	anonymous	4	1	Because birth rates are high globally and people should act responsibly by not starting a family until a cure is found.		202				2	Birth rates globally are high and we all need to think carefully about that.		201				4	3	2	2	2	2	4	4	4	2	English	64	5	3	2	2	2
2017-01-08 16:18:24	2017-01-08 16:36:17	0	120.17.147.144	100	1072	1	2017-01-08 16:36:18	R_1q3xnRWYNNvlMEB					-33.861206054688	151.19821166992	anonymous	4	1	Dual purpose. reduces human birth rate (overpopulation) plus stops babies being born with microcephaly (all other factors being equal...)		1000				1	same as before plus an extra year of being with one less child will help strengthen the woman's financial situation in developing countries		1000				1	2	2	1	1	2	5	3	4	2	Australian	38	2	3	2	1	2
2017-01-08 16:19:01	2017-01-08 16:36:34	0	73.25.154.144	100	1052	1	2017-01-08 16:36:35	R_2xQncFaQdPmbDqs					45.550796508789	-122.73770141602	anonymous	4	1	The world has more people than can be humanely supported upon it's finite space and resources already.		101	1			1	Because I don't think unlimited having of human offspring is right, nor do I think it is A right.		101	1			4	4	4	1	1	1	4	3	4	2	American	44	5	3	2	2	2
2017-01-08 16:21:33	2017-01-08 16:36:39	0	50.148.9.80	100	905	1	2017-01-08 16:36:40	R_8reWElF9PlMPwnT					40.476303100586	-86.957099914551	anonymous	4	5		It is unfair to ask people to delay conception, since many variables affect that choice and a later time may not be possible for some mothers. Therefore, I believe such a request should be avoided unless absolutely necessary.			101		5		Same reason as before. I feel uncomfortable with the argument presented in the previous question, since I'm not sure what the implications are.			101		5	3	2	1	1	1	4	3	3	2	Pakistani	22	2	3	2	2	3
2017-01-08 16:12:08	2017-01-08 16:37:03	0	191.95.244.4	100	1494	1	2017-01-08 16:37:04	R_3nx6vu8LHhd3iwJ					4.5980987548828	-74.075798034668	anonymous	4	5		Because if a woman want to have a baby i dont try to ban her decision			217		5		Cause i dont want to suprime the option that the people have to reproduce them when they want			217		6	2	2	6	5	2	3	3	3	1	Colombian	21	4	3	2	2	2
2017-01-08 16:32:19	2017-01-08 16:41:39	0	50.183.126.121	100	559	1	2017-01-08 16:41:42	R_RxgjK5Smzc493Bn					39.742706298828	-105.07260131836	anonymous	4	1	Because it has other inherent social benefits for the women, such as allowing them to delay conception until their choosing and enabling women to own their power and sexuality.		200				1	Even if it changes which baby is theoretically born, a woman should have the choice and the theoretical non-conceived lives are not equal to the potential trauma to the real live breathing woman		200				4	3	3	1	1	1	4	3	4	2	US Citizen	26	5	2	2	2	2
2017-01-08 16:26:47	2017-01-08 16:41:46	0	208.58.72.48	100	899	1	2017-01-08 16:41:47	R_1puuXCu8W5peiTx					38.934494018555	-77.059600830078	anonymous	4	1	A. Aegypti is not easy to kill and mosquito repellent would be less effective. Additionally it's unlikely the repellent would be applied evenly across the population meaning poor and less populated areas would likely not receive as thorough of repellent application. Lastly, contraception I can control , proper application of repellent I'd need to trust someone else to do properly.		149				4							3	3	3	3	5	2	2	2	2	2	Usa	31	6	1	2	2	2
2017-01-08 15:23:07	2017-01-08 16:45:26	0	68.69.222.147	100	4938	1	2017-01-08 16:45:28	R_3xCjogDFWPE0NyN					54.133499145508	-108.43470001221	anonymous	4	6		It is easier to motivate people toward a common goal than to ask them to give something up. Wearing the hat of a government official I would choose the mosquito repellent option as it is more likely to build social cohesion. In addition, the repellent option would allow families to participate in the positive outcome in a way that would be difficult to achieve with the contraception option. My ch…			101		6		The mosquito repellent offers more social benefit because it is less likely to put the onus strictly on women to solve the problem.			101		6	3	4	4	1	1	2	2	2	1	Canadian	53	6	3	2	1	2
2017-01-08 16:38:20	2017-01-08 16:53:36	0	32.210.33.152	100	916	1	2017-01-08 16:53:37	R_1FLgnGK3fgCJt7z					41.374496459961	-72.939598083496	anonymous	4	5		protects even those who want to or accidentally become pregnant; also protects non pregnant people and children.				1	5		Agian, because mosquito repellent helps everyone, those who are actually alive, whether they "should' be or not. It covers accidents and religious decisions and the general public. Plus, these questions so far ignore envirnomental treatments like spraying and bed nets that, again, help everyone. It's not a question of balancing numbers; how many cases of Epstein Barre would mosquito repellent pre…				1	7	6	6	2	2	2	2	2	2	2	US	47	6	5	2	1	3
2017-01-08 16:36:54	2017-01-08 16:54:15	0	179.218.27.92	100	1040	1	2017-01-08 16:54:16	R_1FzBnjyrFkwIQXY					-22.88639831543	-43.203704833984	anonymous	4	2	Both methods depend on user's compliance, but at least the contraception is a social policy that goes beyond the Zika outbrake and also helps in family planning.		500				2	For the same reason as before: contraception is a good public policy not only for countering Zika's outbrake, but also for family planning; the fact that the baby would be different is by no mean relevant for me, for in abstract there is no empathic concern or emotional investment in a hypothesized baby. Maybe I would be convinced if, by some kind of technological wonder, I was able to know more …		500				4	6	2	4	2	2	3	3	3	1	Brazilian	29	6	5	1	2	2
2017-01-08 16:47:43	2017-01-08 16:55:07	0	107.77.197.231	100	444	1	2017-01-08 16:55:09	R_2qh0TaF3LiISw8q					32.778701782227	-96.821701049805	anonymous	4	5		Protects women who are already pregnant when the outbreak begins			301		6		There may be unintended societal effects down the road if there is a gap in births			554		4	5	5	3	3	4	2	2	2	2	American	26	5	1	2	1	3
2017-01-08 16:52:53	2017-01-08 17:00:47	0	206.87.84.147	100	473	1	2017-01-08 17:00:48	R_1f8FQkZtJPtCmfI					48.426696777344	-123.36550140381	anonymous	4	6		Easier to distribute, less intrusive			151		6		Easier to distribute, less intrusive			149		5	5	3	3	2	2	2	2	2	1	Canadian	42	4	1	2	1	2
2017-01-08 16:10:41	2017-01-08 17:02:29	0	189.147.65.150	100	3108	1	2017-01-08 17:02:31	R_WcV6CuqeukT9HDb					19.434204101562	-99.138603210449	anonymous	4	3	Mosquito repellent is voluntary as is contraception, but it is easier to forget or misapply. Also it might have a negative impact on health.		200				3	same reason as before. The "person" who is born changes from one episode of intercourse to another. It's a natural event. No one can guarantee identity.		200				6	6	6	6	6	6	2	2	2	2	Mexican	67	6	1	2	1	2
2017-01-08 16:51:45	2017-01-08 17:03:10	0	76.105.5.232	100	684	1	2017-01-08 17:03:11	R_3L8oKHdXqLqWQ2l					38.482894897461	-121.63980102539	anonymous	4	4							4							4	4	4	2	2	2	4	3	4	2	USA	59	6	1	2	1	1
2017-01-08 16:50:55	2017-01-08 17:03:32	0	50.66.12.246	100	757	1	2017-01-08 17:03:34	R_1Hi6dcQ8SI4vHjJ					51.138702392578	-114.20149993896	anonymous	4	6		In the hope of preventing the spread of all illnesses and diseases from mosquito's (e.g. malaria, dengue fever, etc.) to the whole population and on the assumption that the women have some, if limited, access to contraceptives/family planning			183		6		Same as earlier: mosquito protection for whole population and assuming women have some access to contraceptives/family planning			184		6	5	7	4	6	5	2	2	2	1	Canadian	24	5	3	2	1	2
2017-01-08 16:52:01	2017-01-08 17:04:08	0	184.17.219.216	100	727	1	2017-01-08 17:04:09	R_1BPHnna7TaRL1Fy					41.100494384766	-85.181999206543	anonymous	4	7		People shouldn't have to base their reproductive timing on the whims of an insect.			101		5		Same reason			101		4	3	2	4	3	3	4	4	4	1	US	43	6	3	1	2	2
2017-01-08 16:57:08	2017-01-08 17:06:58	0	174.25.119.224	100	589	1	2017-01-08 17:07:00	R_22P06XF1qDpW08k					45.708297729492	-122.69480133057	anonymous	4	5		The primary threat is the mosquito that spreads the virus. You must neutralize the primary threat. With that in mind the repellant would only be effective if part of an eradication program to be effective.				1	4							6	6	4	4	4	4	2	2	2	2	American	55	4	1	2	1	2
2017-01-08 16:49:44	2017-01-08 17:08:32	0	50.129.53.127	100	1127	1	2017-01-08 17:08:33	R_OlkrgLstCbc4w2l					41.683395385742	-86.238800048828	anonymous	4	4							4							3	3	5	2	2	2	2	2	2	2	USA	34	6	1	2	2	3
2017-01-08 17:00:12	2017-01-08 17:10:01	0	186.15.139.177	100	589	1	2017-01-08 17:10:03	R_ZF5XX8I6GyJmDyp					9.9333038330078	-84.083297729492	anonymous	4	1	Because women should choose if they want to get pregnant in tghe first place			1			1	Its about a womans right to choose not to be at risk, it is about her health not only the potential live. Her life is important too		527	1			6	6	6	1	1	1	2	2	2	2	Costa rica	39	5	3	2	1	3
2017-01-08 13:25:05	2017-01-08 17:12:24	0	79.208.220.55	100	13638	1	2017-01-08 17:12:25	R_3PgBC9ecJos2WEi					51.36669921875	12.38330078125	anonymous	4	2	i think in the long run it could be more safe for the unborn children		153				6		gut instinct, woman have the right to choose			150		4	3	3	2	1	1	2	2	2	1	German	28	6	5	2	2	1
2017-01-08 17:01:33	2017-01-08 17:13:21	0	91.64.93.147	100	707	1	2017-01-08 17:13:22	R_1eJBybdOvODEA7I					52.516693115234	13.399993896484	anonymous	4	7		Mosquito repellent addresses the root cause of the problem			110		7		Mosquito repellent targets root cause of the problem			110		3	3	3	1	4	4	4	4	4	2	USA	43	6	1	2	2	3
2017-01-08 17:07:40	2017-01-08 17:17:04	0	173.14.133.189	100	564	1	2017-01-08 17:17:05	R_SCWrnPoGVCpFt0l					42.634201049805	-72.602600097656	anonymous	4	7		It gives people the freedom to continue to have children when they please			500		7		same as previous answer--freedom to reproduce as one wishes			500		1	1	1	2	2	2	2	2	2	1	us	52	5	3	1	1	2
2017-01-08 17:11:31	2017-01-08 17:17:45	0	60.241.240.237	100	373	1	2017-01-08 17:17:46	R_6DnsdL7J7KJ4jIJ					-33.791793823242	151.08059692383	anonymous	4	7		I am catholic.				1	7		I am catholic				1	5	3	3	1	1	1	1	1	1	2	Australian	46	6	1	2	2	1
2017-01-08 17:00:15	2017-01-08 17:18:06	0	89.71.31.172	100	1070	1	2017-01-08 17:18:08	R_2wtqYQhz6Mps6Kx					54.360794067383	18.658294677734	anonymous	4	7		Because it makes pairs able to have children in the time they want to, does not require them to do practicaly anything and still have healhy children.			178		7		I don't believe that affecting who is born adds anything to to the case. I think that who is born is random to some degree, and wheather we play the lottery now, or tommorow does not play any part in determining which one is more moral.			204		2	2	2	2	2	2	3	3	3	1	Polish	28	2	1	2	2	2
2017-01-08 17:08:39	2017-01-08 17:18:48	0	42.153.56.16	100	609	1	2017-01-08 17:18:51	R_1MLI0h6Was9Cmpu					3.0950012207031	101.62319946289	anonymous	4	1	A delay in contraception would confer other benefits - spaced out families, for one. This is better for mankind as it will control the population growth.		200	1			1	Form of spacing out families.plus once pregnant there is chance of them forgetting mosquito repellant. Pregnant women who are fearful have an incentive to wear mosquito repellant at their own cost,		202				1	1	2	2	2	1	5	5	5	2	Malaysian	39	4	1	2	2	1
2017-01-08 17:11:50	2017-01-08 17:21:12	0	148.252.128.178	100	562	1	2017-01-08 17:21:13	R_28O1T7nzVcaYWjo					51.496398925781	-0.12240600585938	anonymous	4	1	Because it works all the time, or at least more reliably than a spray.		101				2	As before - because it is effective all the time.		101				3	3	3	1	1	1	5	3	5	2	British	48	6	2	2	2	1
2017-01-08 16:59:58	2017-01-08 17:21:44	0	39.60.73.196	100	1306	1	2017-01-08 17:21:45	R_aXgWlU5QYxRm0RL					34.776092529297	72.361099243164	anonymous	4	1	Mosquito repellent is not 100 per cent secure		1000	1			1	Why do we need more humans quickly? We may wait a bit more for safer environment.		1000	1			3	2	2	1	1	2	5	5	5	1	Pakistani	40	6	1	2	2	1
2017-01-08 17:10:34	2017-01-08 17:23:53	0	142.59.240.239	100	798	1	2017-01-08 17:23:55	R_ZIiIF2e4dr4gDxn					53.551406860352	-113.49160003662	anonymous	4	1	Contraception should be impowering women aswell, educating more people about how to safely have sex and control their pregancy. It has more attractive benefits than just musquito repellant.		101				1	Contraception; being bogged down in 'who's born when' is ultimately futile. You cant say one egg/sperm combo will be better or worse, and which sperm acctually fertilizes a given egg is basicly a lotery as it is. Doesn't matter.		101				2	1	1	1	2	1	5	5	5	1	Canadian	21	5	3	2	2	3
2017-01-08 17:22:23	2017-01-08 17:32:04	0	99.137.245.191	100	580	1	2017-01-08 17:32:05	R_2uVBscClG42cbeA					29.704406738281	-98.074203491211	anonymous	4	1	Toxicity of mosquito repellent			1			1	Toxicity of repellent			1			4	4	4	1	1	1	4	3	4	2	US	68	4	3	2	1	1
2017-01-08 17:17:39	2017-01-08 17:32:33	0	69.54.138.238	100	893	1	2017-01-08 17:32:35	R_2QmlkxigdxWQGoX					45.250595092773	-122.46049499512	anonymous	4	4							5		Your scenario changed my mind. Contraception prevented Tanja's both.			101		3	3	3	2	2	2	2	2	2	2	Usa	44	4	3	2	1	2
2017-01-08 17:16:44	2017-01-08 17:35:23	0	108.65.196.136	100	1118	1	2017-01-08 17:35:24	R_3R7OeZNFd4Sv1b2					37.925506591797	-122.34370422363	anonymous	4	1	Seems more effective at the outset, preventive a pregnancy seem better than mosquito repellent which can lose effectiveness over time			1			2	Because contraception is a time tested method, mosquito repellents must be altered over time when the mosquito eventually becomes immune to the repellent, plus the repellent itself is chemical, and unintended consequences always appear.			1			6	6	2	2	2	2	4	4	4	2	usa	59	4	2	2	1	3
2017-01-08 17:30:00	2017-01-08 17:37:18	0	120.150.19.200	100	438	1	2017-01-08 17:37:19	R_2agCsO500t19VSN					-35.021392822266	138.61428833008	anonymous	4	4							4							4	4	7	7	7	4	5	4	1	2	Australian	50	5	3	1	1	2
2017-01-08 17:29:23	2017-01-08 17:38:42	0	50.186.44.254	100	558	1	2017-01-08 17:38:43	R_2rijzo4VfoPAS0D					45.342193603516	-122.66389465332	anonymous	4	2	People would take it more seriously than a repellent, in my opinion.		116				2	It does not matter that a baby is different. How would anyone know what Tanya would have been like?		116				1	4	2	1	2	1	4	4	4	2	Russian	25	5	3	2	2	2
2017-01-08 17:21:13	2017-01-08 17:40:15	0	84.227.14.146	100	1141	1	2017-01-08 17:40:16	R_1M4kS989rC3mS3o					46.210296630859	6.1463928222656	anonymous	4	7		I reign in my personal urge to in this way also constrain over-population and choose the one that is less invasive to the human sphere.			110		7		First, saying "Some experts have pointed out" for such a trivial and immediately-obvious insight is a joke. One of the more interesting questions is, given the fact that both options will have non-compliance rates, what part of the population will procreate under the birth control regime vs what kind of families will have to cope with children with disabilities, etc.			101		4	2	2	1	1	1	5	4	4	1	German	34	6	1	2	2	1
2017-01-08 17:20:10	2017-01-08 17:42:04	0	106.51.23.40	100	1313	1	2017-01-08 17:42:05	R_2CdYfsjpnz8gxYF					12.983306884766	77.583312988281	anonymous	4	1	It is a false equivalency to assume that the mosquito repellent and contraception are similar in efficacy or nature. If contraception fails - a remote possibility in of itself, then there's a small chance that the mother will get zika and an even smaller chance that the baby will have microcephaly. There's a multiplicative effect that reduces the probability of microcephaly cases as a whole. This…		101				1	Discounting people who might exist (for baby Tanya is but a future possibility that we can't know of when we fund contraception) over the very present facts and birth defects which *will* almost certainly exist makes the argument moot.		101				1	7	4	1	3	4	2	2	2	2	American	24	1	1	1	2	2
2017-01-08 17:30:46	2017-01-08 17:42:37	0	189.74.209.48	100	711	1	2017-01-08 17:42:39	R_3EDT6L9u2lk1vMI					-29.362503051758	-50.903198242188	anonymous	4	5		People can still get pregnant if they want			101		5		The baby is the same			101		6	3	3	1	1	1	4	4	3	1	Brazil	40	6	2	2	1	2
2017-01-08 17:36:00	2017-01-08 17:43:52	0	72.69.248.65	100	471	1	2017-01-08 17:43:53	R_2Bs6HwXGpbcV7un					40.868499755859	-73.839401245117	anonymous	4	6		Helps stop all On my way! contacting Zika			979	1	7		Infected persons will transmit when they later conceive				1	4	7	7	2	2	3	1	1	1	3	Immegrant	45	6	2	2	1	3
2017-01-08 13:08:47	2017-01-08 17:44:27	0	86.246.213.248	100	16540	1	2017-01-08 17:44:29	R_27p8JGnjAjRdqqw					48.820999145508	2.2772064208984	anonymous	4	4							4							1	1	2	1	1	1	4	3	2	1	French	32	6	2	2	2	2
2017-01-08 17:35:48	2017-01-08 17:46:19	0	80.6.56.90	100	631	1	2017-01-08 17:46:20	R_3R7mpkzklGbcysY					51.509201049805	-0.095504760742188	anonymous	4	3	I think the repellent programme is more likely to fail, if either do. Contraception means definitely no zika babies		151				3	As before. Who cares if Thomas is born instead of Tanya - Tanya doesn't exist in scenario B so nothing is lost		151				3	3	3	1	1	1	5	2	2	2	British	39	6	2	2	1	2
2017-01-08 17:43:54	2017-01-08 17:52:48	0	95.144.81.245	100	533	1	2017-01-08 17:52:50	R_W6GGu49VfV7qJbP					55.830093383789	-4.2528991699219	anonymous	4	6		Because people can still get pregnant. Hi JP			203		6		Because people can still have babies			202	1	6	7	7	1	1	1	2	2	2	2	Canadian	44	6	1	2	1	3
2017-01-08 17:29:26	2017-01-08 18:01:46	0	141.135.101.94	100	1939	1	2017-01-08 18:01:47	R_1CI92kRjDk2FFGO					50.846603393555	4.3527984619141	anonymous	4	6		it is the woman's choice to get pregnant. The mosquito repellent supports this choice.			1000	1	6		it is the woman's choice to get pregnant. Everyone can practice contraception, not everyone has access to mosquito repellent			973	1	4	4	4	2	2	3	2	2	2	2	Greek	46	6	3	1	2	3
2017-01-08 17:49:56	2017-01-08 18:01:53	0	176.11.139.126	100	717	1	2017-01-08 18:01:55	R_1qf95pnUzWq7XXg					59.904998779297	10.74870300293	anonymous	4	5		Because I assume its easier to get women to protect themselves against mosquito bites than to postpone having children.			200		6		Because if they are both equally effective, then the contraception method will create an unatural condition to the population, with a 'missing' few years of children. This will later effect the economy, schools, workforce, etcetera.			503		5	5	5	1	1	1	2	2	2	2	Norwegian	21	5	3	2	2	3
2017-01-08 17:48:38	2017-01-08 18:02:59	0	75.86.39.14	100	860	1	2017-01-08 18:03:00	R_2E3PLTnQy5JW0wP					43.046401977539	-87.966903686523	anonymous	4	1	The chances of contracting Zika are essentially eliminated if babies are not born until the danger has passed, rather than saturating an already polluted and damaged environment with more chemicals in the hopes that it will eliminate all mosquitoes that carry the virus.			1			1	In addition to avoiding cases of Zika, I believe the explosion of the human population in recent years is a detriment to the environment and so in all cases, I would prefer contraception for the sake of reversing the environmental damage people have already caused with a lower population.			1			2	2	3	1	1	1	3	3	3	2	American	29	5	2	2	2	2
2017-01-08 17:52:29	2017-01-08 18:05:03	0	196.207.43.211	100	754	1	2017-01-08 18:05:05	R_2VsjedaHDBZ0eFJ					-29	24	anonymous	4	1	The world is overpopulated with humans.		1000	1			2	I was hoping that the woman would fail to have the later baby for some reason. I don't believe a baby with microcephaly is preferable to a healthy baby. My preference is for fewer babies in general.			1			1	2	2	1	2	1	5	4	5	1	South African	44	6	1	2	2	3
2017-01-08 17:55:34	2017-01-08 18:05:55	0	101.183.172.57	100	620	1	2017-01-08 18:05:56	R_2bWBIEJ8GtLXQB5					-27.473205566406	153.02151489258	anonymous	4	2	Possibly more effective in motivated population		101				4							4	6	2	6	3	2	4	3	2	2	Australian/ British	42	6	1	1	2	2
2017-01-08 17:49:07	2017-01-08 18:06:17	0	83.58.192.89	100	1029	1	2017-01-08 18:06:18	R_3MlYydPR7bhjs1E					41.398406982422	2.1741027832031	anonymous	4	2	more effective (repellenta don't always work), can also solve some side problems (abandonned unwanted children..)		200				2				1			2	3	6	2	2	6	3	3	4	2	Russia	24	6	1	2	2	1
2017-01-08 18:01:36	2017-01-08 18:11:34	0	136.62.25.15	100	597	1	2017-01-08 18:11:36	R_3GCyu628LqoVpm4					30.241394042969	-97.768699645996	anonymous	4	4							4							4	4	4	4	4	4	1	1	1	2	USA	54	6	3	2	2	3
2017-01-08 18:12:21	2017-01-08 18:18:29	0	68.3.155.164	100	368	1	2017-01-08 18:18:31	R_3maQhREqZED30vs					33.393600463867	-111.7161026001	anonymous	4	4							4							5	4	3	4	3	4	2	2	2	1	USA	27	5	2	1	2	2
2017-01-08 17:59:20	2017-01-08 18:19:03	0	24.20.146.182	100	1183	1	2017-01-08 18:19:03	R_3EFHY3syKMPjoBn					45.474105834961	-122.37870025635	anonymous	4	7						1	7						1	7	7	7	1	1	1	4	4	4	1	Russian	26	4	2	1	2	1
2017-01-08 18:10:41	2017-01-08 18:20:29	0	73.202.242.34	100	587	1	2017-01-08 18:20:30	R_3F3WBnIIIsoJaRZ					37.781097412109	-122.46250152588	anonymous	4	5		protects the already pregnant women			196		5					151		3	5	3	3	2	2	2	1	2	2	USA	18	1	2	2	2	2
2017-01-08 18:14:15	2017-01-08 18:22:24	0	117.214.130.85	100	489	1	2017-01-08 18:22:26	R_3Dcm8JBuE9hnnDE					25.449996948242	81.850006103516	anonymous	4	1	To avoid Over population			1			1	Ok, i want to avoid more babies rather than avoid zike			1			2	1	3	2	1	1	5	4	4	2	Indian	39	5	2	2	2	1
2017-01-08 18:11:16	2017-01-08 18:22:28	0	47.208.131.183	100	672	1	2017-01-08 18:22:29	R_31GXT7gMXdiWUmn					40.802093505859	-124.16369628906	anonymous	4	5		Some women will decide during this period that it is the appropriate time to have a a child, due to personal factors other than the prevalence of Zika virus.			101		6		I don't think it would be preferable for a a country to have a demographic gap with a period of very low birth rates followed by very high birth rates. (However, I do think global human populations should be vastly reduced.)			101		6	3	2	1	1	1	4	2	2	1	U.S.	27	5	3	2	2	2
2017-01-08 18:03:29	2017-01-08 18:23:23	0	157.52.4.116	100	1194	1	2017-01-08 18:23:25	R_2xKxEYB7w7exRDd					43.680297851562	-79.353797912598	anonymous	4	2	Additional benefits to providing contraception. Repellent has narrow application.		149				2	Innumerable contingencies. No one child destined to be born. Every action taken by the mother conceivably impinges on what sort of child they birth.		149				4	4	4	2	3	3	4	3	3	1	American	24	5	2	2	2	2
2017-01-08 18:10:15	2017-01-08 18:23:35	0	196.200.42.64	100	799	1	2017-01-08 18:23:37	R_cYKLLM86nW2rkSB					-1.2832946777344	36.816696166992	anonymous	4	7		Its uncertain how long the virus will be around.				1	7		Its unethical to delay the pregnancy			840	1	7	7	7	1	1	1	1	1	1	2	Kenyan	20	2	3	1	2	1
2017-01-08 18:15:39	2017-01-08 18:26:32	0	155.4.134.168	100	653	1	2017-01-08 18:26:34	R_2OPgGHaeVON2BKj					59.333297729492	18.050003051758	anonymous	4	6		I think people will be more likely to use mosquito repellent.			101		6		There are less ethical implications with mosquito repellent			120		4	3	3	3	5	2	2	2	2	1	Swedish	26	2	2	2	2	3
2017-01-08 18:11:44	2017-01-08 18:29:57	0	67.198.14.37	100	1093	1	2017-01-08 18:29:58	R_1kZiAplnwOxzA8Y					30.491500854492	-97.754402160645	anonymous	4	6		more irradiation, less harm, removes easy way out (out of sight out of mind)			201		7		dealing with the issue vs playing God....contraception may be easy but it doesnt irradiate the cause: we are an effect society unwilling to do what it takes to irritant a problem			201		4	4	4	2	1	2	3	2	2	2	usa	55	5	3	2	1	1
2017-01-08 18:08:47	2017-01-08 18:29:56	0	158.148.203.74	100	1268	1	2017-01-08 18:29:58	R_2YM6k0ccZs4IKkn					40.833297729492	14.25	anonymous	4	5		Because infected tissues are a prosperous environment for bacteria to develope their evolutive improvement in infecting, resisting, proliferating. So I believe it would be better to reduce as much as possible the number of infected individual (while I am looking for structural defences like vaccination) and at least reduce the possibility for the virus to spread and become stronger and more dange…			200		5		The argument of "different" babies is pretty ridicolous, the same child may have one bazillion different factors, casualties, accidents shaping his health (just to limit to the health) and the environment he will inhabit. It is absolutely out of any kind of logic, scientific or critical discours to determine if different child would be born from the same parents in different times. It is just mat…			202		7	7	7	7	4	3	2	2	2	1	Italian	24	6	5	2	2	2
2017-01-08 18:23:59	2017-01-08 18:32:06	0	5.226.137.182	100	487	1	2017-01-08 18:32:07	R_3fxav0318qTot5N					51.496398925781	-0.12240600585938	anonymous	4	7		Delaying births could lead to 'baby boom' strain on health services, schools etc			150		7		Same as before - enable ongoing births instead of population gap			150		5	3	3	3	1	3	2	2	2	2	British	39	6	2	2	2	3
2017-01-08 18:32:51	2017-01-08 18:49:55	0	80.71.141.100	100	1023	1	2017-01-08 18:49:56	R_42bjafBoO6inPup					55.675903320312	12.565505981445	anonymous	4	7		since they are equally effective: mosquito repellent as I undestand does not cause any harm to the mosquitos but just repels them and humans can still have babies, contraception on the other hand takes away the possibility for the pregnancy. I think that the possibility for creation of new healthy life is ethically worth more than mosquitos annoyance.			101		7		same as before			101		6	6	3	6	6	2	2	2	1	1	polish	31	6	2	2	1	3
2017-01-08 18:46:29	2017-01-08 18:53:17	0	75.165.40.1	100	407	1	2017-01-08 18:53:18	R_9mmW5TYu6kWwK89					47.583892822266	-122.29949951172	anonymous	4	1	The largest threat is to pregnant women. Women who are not allowed or don't have access to contraception have a double risk.		1000	1			1	same answer as before		1000	1			7	7	7	1	1	1	2	2	2	2	American	47	5	2	2	1	3
2017-01-08 18:38:38	2017-01-08 18:53:32	0	186.250.245.202	100	893	1	2017-01-08 18:53:33	R_2U4a5CSmmd2u5Sf					-15.783294677734	-47.916702270508	anonymous	4	5					101		5					101		6	6	4	6	3	2	2	2	2	2	Brazilian	36	6	1	2	2	3
2017-01-08 17:02:36	2017-01-08 19:01:42	0	73.96.3.29	100	7146	1	2017-01-08 19:01:42	R_0dBRa5E726EU0PH					45.445999145508	-122.88200378418	anonymous	4	4							6		Changing the fertility rate can have generational effects, more so than an increase in birth defects.			298		3	4	3	3	3	1	4	4	4	1	American	36	4	3	1	1	1
2017-01-08 18:54:46	2017-01-08 19:01:45	0	24.53.244.130	100	418	1	2017-01-08 19:01:46	R_1QMf0J8gm20QX31					45.416595458984	-75.690399169922	anonymous	4	5					202		5					128		6	3	5	3	2	3	3	3	2	1	Canadian	25	4	3	2	2	3
2017-01-08 18:58:44	2017-01-08 19:10:28	0	75.165.57.152	100	703	1	2017-01-08 19:10:29	R_262sm6rgtaOYw5f					47.610198974609	-122.30429840088	anonymous	4	2	Contraception also prevents std's and unwanted pregnancies		101				2	Std's and unwanted pregnancies.		349	1			3	3	3	1	1	1	3	3	3	1	American	61	4	1	2	1	2
2017-01-08 19:14:50	2017-01-08 19:19:35	0	174.61.145.167	100	285	1	2017-01-08 19:19:36	R_22twNJPOuyHAKJb					47.787704467773	-117.45550537109	anonymous	4	2			151				2			151				3	3	6	2	2	2	3	3	3	2	USA	39	6	5	2	2	2
2017-01-08 19:01:29	2017-01-08 19:20:47	0	194.75.6.122	100	1157	1	2017-01-08 19:20:48	R_3fIV9fTGQVXz0tb					51.013702392578	-4.2534942626953	anonymous	4	6		Mosquito repellant is more like to be used in a place where sexual activity takes place and where pregnant women live than the use of contraception and the forward planning necessary to control pregnancy.			191	1	4							4	6	5	5	3	2	4	4	4	1	British	73	5	1	2	1	1
2017-01-08 19:12:36	2017-01-08 19:21:31	0	216.48.163.236	100	534	1	2017-01-08 19:21:32	R_1q9PJW8FqrXSmrw					45.343795776367	-75.715698242188	anonymous	4	3	Mosquito repellent could fail or wear off.		550				4							2	2	2	2	2	2	4	3	4	2	Canadian	43	6	3	2	1	2
2017-01-08 19:07:47	2017-01-08 19:22:30	0	71.211.24.147	100	883	1	2017-01-08 19:22:31	R_3TR2LzmHP60b0P3					38.893600463867	-104.73519897461	anonymous	4	4							4							6	3	2	1	1	1	5	4	4	1	US Citizen	21	5	2	2	2	2
2017-01-08 19:09:37	2017-01-08 19:22:58	0	70.53.64.233	100	800	1	2017-01-08 19:22:59	R_1hKEAS3a1lQNFvA					44.256896972656	-76.471702575684	anonymous	4	1	mosquito repellent may have known or unknown side effects; I believe most women would prefer contraception if available		101				1			101				6	6	5	3	3	2	4	4	4	2	Canadian	56	6	2	2	1	2
2017-01-08 19:12:21	2017-01-08 19:32:08	0	77.138.150.56	100	1186	1	2017-01-08 19:32:09	R_27QImFz282Pd6yV					32.066604614258	34.764999389648	anonymous	4	7		there are already effective methods of preventing pregnancy, i.e. informed natural family planning or abstaining from sex during the zika crisis			534	1	7		either informed natural family planning or abstaining from sex during the Zika crisis are effective alternatives to contraception; also, we may not know yet know long-term dormant effects the Zika virus may have on women and later children so better to avoid the virus altogether				1	4	7	7	2	7	3	5	2	2	2	USA	23	5	4	1	2	3
2017-01-08 19:08:19	2017-01-08 19:35:15	0	199.87.86.245	100	1616	1	2017-01-08 19:35:16	R_eJY0lZZN3tzfXRT					37.789794921875	-122.39419555664	anonymous	4	1	Mosquito repellent wouldn't reduce the number of actual disease-carrying mosquitos, may come with other side effects, and might prove ineffective in practice, but contraceptives are known to be effective and would come with additional benefits for low income women.		101				1	Empowering women to choose when to become pregnant – or avoid pregnancy entirely – is preferable to women lacking access to contraceptives in the first place, plus the Zika risk is reduced just as effectively as well. Two birds, one stone.		101				4	4	2	1	1	1	4	3	3	2	American	33	1	1	2	2	2
2017-01-08 19:19:22	2017-01-08 19:38:24	0	83.58.192.89	100	1142	1	2017-01-08 19:38:26	R_1GwOqjOsJYOpbIO					41.398406982422	2.1741027832031	anonymous	4	7		It affects less people's plans.			204		6		As before pointed, it affects less people's planning.			204		1	6	6	2	2	2	5	4	5	1	Albanian	25	6	2	2	2	3
2017-01-08 15:11:09	2017-01-08 19:41:06	0	69.201.40.238	100	16197	1	2017-01-08 19:41:08	R_1E6ASiEwhaZ0jbT					42.407196044922	-76.515899658203	anonymous	4	6		Because it has a smaller impact on people's lives: spraying a repellent is less invasive than changing your family planning.			120		6		You asked me the same question twice, hence I answer the same. However, I disagree with the added information. All it takes for a different child to be born is a different sperm seed to reach the egg, and that can also happen because sex is delayed for a minute due to spraying repellent.			120		7	7	7	7	2	5	5	4	2	1	Belgian	33	6	5	1	2	3
2017-01-08 17:49:23	2017-01-08 19:42:41	0	67.44.193.252	100	6798	1	2017-01-08 19:42:43	R_1g5QBRLkMepXEep					32.778701782227	-96.821701049805	anonymous	4	1	Contraception only effects the woman. Where Mosquito repellent effects everyone, the elderly and children etc			1			1	Women can choose to delay birth until the threat is no longer. With repellent everyone is exposed to the dangers of these chemicals, including future generations.		101	1			4	4	6	4	4	2	5	5	5	2	American	64	2	1	2	1	2
2017-01-08 19:32:14	2017-01-08 19:45:32	0	14.202.192.216	100	798	1	2017-01-08 19:45:33	R_1JW159So0hbnKy7					-35.262496948242	149.14370727539	anonymous	4	6		Because it also solves the problems associated with other mosquito borne diseases.			540		6		The population effects seem like they'll be difficult to respond to later.			710		5	5	5	3	2	3	2	2	2	2	Australian	34	6	1	2	2	3
2017-01-08 18:12:26	2017-01-08 19:49:05	0	93.103.143.133	100	5798	1	2017-01-08 19:49:06	R_1jsaoJNOtlfsPal					46.05110168457	14.505096435547	anonymous	4	2	Its more effective and there are too many people in the world		522	1			2	because there are too many people living in the world			1			2	4	4	2	3	4	3	3	1	2	slovenian	25	5	2	2	2	3
2017-01-08 19:47:23	2017-01-08 19:52:55	0	65.78.130.79	100	331	1	2017-01-08 19:52:56	R_1gA6zGukG852IQ5					38.568893432617	-121.43830108643	anonymous	4	4							4							3	3	3	2	3	2	3	3	3	2	United States of America	44	5	3	2	1	3
2017-01-08 19:42:58	2017-01-08 19:53:10	0	76.88.72.204	100	611	1	2017-01-08 19:53:11	R_AGKPzPNVOOCovTz					32.650497436523	-117.14920043945	anonymous	4	2	Both are equally effective, but contraception has the added benefit of maintaining the population at a sustainable size for longer.		150				2	The same reason previously stated.		150				4	1	4	4	1	4	2	2	2	1	American	21	5	4	1	2	1
2017-01-08 17:50:39	2017-01-08 20:03:49	0	174.93.152.21	100	7990	1	2017-01-08 20:03:51	R_3dLEgqXLFKqdCRt					45.459396362305	-73.550102233887	anonymous	4	7		So that prospective parents wouldn't have to postpone their conception plans. But I would have preferred putting the money to something totally different than the two options given. Outside of indefensible views about impersonal aggregate well-being, both medical options assume that the lives of kids with micrcephaly are intolerable for them, and that is outrageously false. (Minimally, you should…				1	7		Same reason as my answer to question 1.				1	7	7	7	1	7	7	2	2	2	1	Canadian	41	6	5	1	1	2
2017-01-08 19:58:11	2017-01-08 20:06:41	0	64.39.189.134	100	510	1	2017-01-08 20:06:42	R_tPzbliH3m4phMoV					43.650497436523	-79.551696777344	anonymous	4	4							4							7	4	2	2	2	1	2	2	2	1	Canadian	49	4	1	2	2	2
2017-01-08 19:54:08	2017-01-08 20:09:39	0	77.232.15.216	100	930	1	2017-01-08 20:09:40	R_1DYXKLEHt1Q6ijg					55.748504638672	37.618392944336	anonymous	4	5		You should be able to choose when you want to get pregnant without worrying about this. Also mosquito repellent could be effective to people already pregnant or who become pregnant not via their own choice.			206		5		I still think that there are more ways in which pregnancy cannot be prevented and in this case there should be options. also how long would it take until they could stopnusing contraception? not only might the child change, but the parents too might regret not having kids or regret not having them earlier			635		2	4	2	1	1	1	5	5	5	2	South African	27	5	3	1	2	3
2017-01-08 20:06:22	2017-01-08 20:15:19	0	89.214.130.46	100	536	1	2017-01-08 20:15:20	R_paqJtZ2jYIOsTlv					38.716705322266	-9.13330078125	anonymous	4	5		Interferes less with peoples personal choices			199		5		Interferes less woth peopls choice			198		1	1	1	6	2	1	4	4	4	1	Portugal	28	6	2	2	2	2
2017-01-08 20:10:45	2017-01-08 20:17:27	0	24.107.42.245	100	402	1	2017-01-08 20:17:27	R_3xDO9QPLzxpUvpb					38.848999023438	-89.938499450684	anonymous	4	1	Contraception is a social good anyway		101				4							3	3	3	3	1	2	3	3	3	1	US	29	6	4	1	1	3
2017-01-08 19:55:03	2017-01-08 20:23:22	0	62.45.110.203	100	1699	1	2017-01-08 20:23:24	R_2YKc5E9zsjX0mFN					52.020599365234	4.718505859375	anonymous	4	6		Because having sex with a condom on sucks. Plus, women should have control over when they want to have a baby.			120		7		The same reason I said it the first time. Sex with condoms on sucks. Plus, women should be able to have babies when it suits THEM, sort of.			120		3	2	1	3	3	1	5	4	4	1	Dutch	26	5	4	2	2	2
2017-01-08 20:05:27	2017-01-08 20:24:12	0	84.82.254.245	100	1125	1	2017-01-08 20:24:13	R_28YysMtXYOPGm4h					52.350006103516	4.9167022705078	anonymous	4	6		If tge repellent equally effective, why delay pregnancy.			110		6		Same as before, plus it is sometimes risky to delay pregnancy, fertility issues			110		6	6	6	6	2	6	2	2	2	2	Lithuanian	31	6	1	2	2	3
2017-01-08 20:10:47	2017-01-08 20:31:36	0	50.66.67.220	100	1249	1	2017-01-08 20:31:37	R_3HH0pHIHKpXINiN					51.156295776367	-114.0571975708	anonymous	4	5		To protect those women already pregnant at the start of the Zika outbreak.			130		5		The mosquito repellant protects women already pregnant when the Zika outbreak occurs. Contraception just helps women who are not pregnant at the time of the outbreak. The arguement about the type of future children being born is a zero sum arguement, and assuming future children after the outbreak (because of contraception) and children born during the outbreak (because of repellant) are both hea…			129		3	3	3	3	2	3	2	2	2	1	Canadian	48	6	2	2	1	3
2017-01-08 20:19:38	2017-01-08 20:31:39	0	124.168.154.4	100	721	1	2017-01-08 20:31:41	R_3isX9QlgDxOAEqm					-33.889205932617	150.85140991211	anonymous	4	3	The ability to control fertility has other benefits to women, but should be her choice.		266				3	Same as first answer. Ability to control fertility has other benefits but should be the choice of the woman.		290				4	4	2	2	2	2	4	4	4	2	Australian	36	5	1	2	1	2
2017-01-08 20:08:45	2017-01-08 20:31:59	0	92.20.201.200	100	1393	1	2017-01-08 20:32:00	R_z6XVWxRCbUZ0hah					51.75	-1.25	anonymous	4	2	Minimise population increase		101				2	Delay population rise. Tanya would stop Thomas existing and vice-versa so moral case for mosquito spray over contraception based on different babies being born is neutral.		101				5	7	7	1	1	1	5	5	3	1	British	26	4	2	2	2	2
2017-01-08 20:18:06	2017-01-08 20:32:56	0	51.9.165.37	100	890	1	2017-01-08 20:32:58	R_3sBwLYUruXkSSjx					51.36669921875	-2.8000030517578	anonymous	4	1	This is a difficult and nuanced question. Ideally contrraception is free, so that women don't have to bear children they do not want, but if they choose to become pregnant they have access to mosquito repellent to protect their child. I think that giving women choice is the more humane option, rather than forcing them to have children because of lack of contraception.		101				1	Why are you asking the same questions again? Answer remains the same		101				4	4	4	7	7	1	4	4	4	2	British	34	6	1	2	2	2
2017-01-08 20:24:17	2017-01-08 20:40:23	0	173.54.75.171	100	966	1	2017-01-08 20:40:24	R_2hjgoQLP6EcEs6x					40.771194458008	-74.206802368164	anonymous	4	6		Both should be available, but the use of mosquito repellent protects those who want to get pregnant as well as those who don't. Asking people to not have children at all is a draconian solution.				1	7		1). Forced contraception is reminiscent of Chinese family planning programs. 2) the length of time contraceptive programs would be necessary to prevent Zika could deprive some women of the choice to have a child at all,and 3) the issue of different babies being born is a red herring.				1	6	4	6	1	1	1	4	3	2	2	US	66	6	1	2	1	1
2017-01-08 20:17:01	2017-01-08 20:41:14	0	82.36.113.199	100	1452	1	2017-01-08 20:41:16	R_3RjY7YSTzeUqlLD					51.600006103516	-0.11669921875	anonymous	4	3	Because I have an ideological belief that contraception should be provided for free to all women to support them in taking control of their own fertility.		101				7		Upon reading the additional information I realised that this argument would provide an argument against pro-choice abortion and I would not wish to create such an argument.			101		3	3	3	6	2	1	2	2	2	2	British	28	6	3	2	1	2
2017-01-08 20:33:05	2017-01-08 20:45:54	0	159.118.61.223	100	769	1	2017-01-08 20:45:56	R_po1P8Dh5dhkGNVL					33.638305664062	-96.724502563477	anonymous	4	2	Repellent is not a guarantee that a person isn't currently infected or gets infected.		101				3	Better able to avoid pregnancy and infection		101				3	2	4	3	2	2	4	4	4	2	American	25	5	3	1	2	2
2017-01-08 20:35:31	2017-01-08 20:47:38	0	80.117.231.101	100	727	1	2017-01-08 20:47:40	R_2v38gUvdhb6ul6X					41.899993896484	12.483306884766	anonymous	4	2	Because I'm not sure that constant use of mosquito repellant would be a good thing for the mother and or child.		200				5		Because contraception and the repellent are equally safe, but use of mosquito repellent wouldn't change the "future"...			110		4	5	4	2	2	3	2	2	2	2	British	53	2	1	2	1	3
2017-01-08 20:42:21	2017-01-08 20:50:17	0	86.4.104.179	100	476	1	2017-01-08 20:50:19	R_3m8h28kPeotVjZs					52.5	-2.0832977294922	anonymous	4	6		Because there will always be pregnant women			501	1	7						1	7	7	2	2	3	1	2	2	2	2	British	29	5	1	2	2	1
2017-01-08 20:42:48	2017-01-08 20:54:55	0	82.36.113.199	100	727	1	2017-01-08 20:54:57	R_273g4m44hP9vpvz					51.600006103516	-0.11669921875	anonymous	4	6		Has less effect on those who wish to start a family and there are no religious restrictions			101		4							2	3	2	2	3	1	2	2	2	2	British	24	6	1	2	2	2
2017-01-08 20:48:50	2017-01-08 20:56:33	0	218.185.151.231	100	463	1	2017-01-08 20:56:35	R_2VHJzQVVekkItPx					34.686401367188	135.51998901367	anonymous	4	6		Allow women more choices			189		6		Women's fertility choices			195		4	2	2	2	2	1	4	4	4	2	Australian	44	6	5	1	1	3
2017-01-08 20:41:50	2017-01-08 20:56:51	0	213.114.44.218	100	900	1	2017-01-08 20:56:52	R_1guNbR3DU2lqXfi					59.850006103516	17.63330078125	anonymous	4	2	Our planet is already overcrowded. Contraception or delaying births is positive in this frame.		101				1	Didn't I answer his question already?		101				3	3	2	2	1	1	5	1	1	2	Italian	38	6	3	2	2	2
2017-01-08 20:54:06	2017-01-08 21:00:50	0	94.10.113.75	100	403	1	2017-01-08 21:00:51	R_2aWEEHA2iMSfEP6					51.473602294922	-0.091598510742188	anonymous	4	5		Benefits everyone, those who accidentally get pregnant can use it.			101		5		Benefits those who accidentally get pregnant			101		5	5	6	3	3	3	2	2	2	2	British	33	6	4	2	1	3
2017-01-08 20:38:02	2017-01-08 21:02:04	0	38.80.243.148	100	1442	1	2017-01-08 21:02:05	R_3HH22fTpK9jy4qB					39.110992431641	-121.12680053711	anonymous	4	7		We obviously have no idea when the virus will come under control and we can't stop pregnancy forever.				1	7		Contraception is unnatural and immoral.				1	6	7	2	2	4	2	4	4	4	2	U>S>	62	4	3	2	1	1
2017-01-08 20:55:24	2017-01-08 21:03:17	0	5.37.50.59	100	473	1	2017-01-08 21:03:18	R_0dOhNhEhHXGPhm5					21	57	anonymous	4	2	There are many benefits to giving contraception but only one purpose for mosquito repellent		538				2	There are many social benefits to providing access to contraception		520				4	5	5	2	1	1	4	4	4	2	USA	34	6	2	2	1	2
2017-01-08 21:01:36	2017-01-08 21:08:33	0	24.254.228.244	100	417	1	2017-01-08 21:08:35	R_3q8YboZlxv1ynI0					37.35400390625	-76.746696472168	anonymous	4	7		Because the repellent would be used for more purposes rather than just pregnant women. It would be used for children, men, the elderly, etc.,			556		2	On second thoughts, delaying birth seems to be more viable long term, not only in terms of population control, but also disease prevention		567				6	3	6	4	4	4	4	4	4	2	American	29	6	3	1	2	2
2017-01-08 17:07:36	2017-01-08 21:09:36	0	2.53.31.61	100	14520	1	2017-01-08 21:09:36	R_9nUDyfx6SqsAIgl					32.066604614258	34.764999389648	anonymous	4	7		I see no reason to interfere so heavily in people's personal decisions when there is another option that does not involve that				1	7						1	7	7	7	1	1	1	2	2	2	2	Italian	35	6	2	2	1	3
2017-01-08 21:00:25	2017-01-08 21:09:56	0	124.187.95.2	100	571	1	2017-01-08 21:09:57	R_11Zv7OdWnsh2Vjl					-27.369094848633	153.0846862793	anonymous	4	1	In my opinion it would be safer.		1000	1			1	Which baby born at what time does not matter. Only that the risks of problems are close to nil.		1000	1			3	4	4	1	3	3	5	4	5	2	Australian	36	6	1	2	2	3
2017-01-08 21:09:37	2017-01-08 21:16:51	0	198.144.52.23	100	434	1	2017-01-08 21:16:52	R_9GM9OQeRGSbsHZ3					39.404693603516	-84.973602294922	anonymous	4	1	Repellents are of average effectiveness in my experiance.		101				4							2	1	2	1	1	1	5	4	4	1	USA	33	6	3	1	2	2
2017-01-08 20:56:43	2017-01-08 21:20:39	0	99.46.92.57	100	1435	1	2017-01-08 21:20:40	R_31RwoVOYji4dgVa					32.736801147461	-117.12770080566	anonymous	4	1	I believe contraception to be more effective at preventing pregnancy than mosquito repellant is at preventing bites. Additionally, I think people would be more likely to use contraception than repellant on a daily basis.		101				1	The same reason that I provided before, I think it would be more effective in implementation. To me, I think that using contraception provides the user with much more control than repellant.		101				6	5	6	2	2	2	3	3	3	1	USA	25	5	3	2	1	3
2017-01-08 21:09:02	2017-01-08 21:21:36	0	93.44.83.62	100	754	1	2017-01-08 21:21:38	R_3EbWJC59HjHxTTS					44.493804931641	11.33869934082	anonymous	4	5		It looks to me like a better step against the actual problem.			204		4							4	3	5	2	3	1	4	4	2	1	Italian	33	4	2	2	2	3
2017-01-08 21:12:36	2017-01-08 21:25:41	0	70.89.88.29	100	785	1	2017-01-08 21:25:43	R_1l69UsSwuA6vuYO					26.212005615234	-80.266899108887	anonymous	4	2	More women need to think about if they are ready for a child. This would serve 2 purposes.		101				4							6	1	1	2	2	1	4	2	2	2	US	64	5	1	2	1	1
2017-01-08 21:21:34	2017-01-08 21:31:57	0	96.2.182.245	100	622	1	2017-01-08 21:31:58	R_1OPGWgS78F4HulD					48.223007202148	-103.70709991455	anonymous	4	2	Without religious objections to birth control included, i think most women would choose contraceptions if they were free. Not knowing the number of cases avoided, it is hard to know what is the better choice.		1000	1			4							2	3	2	2	2	2	2	2	2	2	Usa	32	5	3	2	1	1
2017-01-08 21:15:18	2017-01-08 21:32:37	0	75.68.201.192	100	1039	1	2017-01-08 21:32:39	R_27PPpFeN9FZ0H1v					41.598907470703	-72.977600097656	anonymous	4	7		I believe that the outbreak shouldn't infringe on family planning for humans.			284		7		Humans should be able to plan their families when it's good for them. (not, based on an environmental problem that we have the power to fix)			287		2	2	4	2	3	1	2	2	2	1	United States	42	4	1	2	1	3
2017-01-08 21:22:08	2017-01-08 21:37:34	0	47.142.216.230	100	926	1	2017-01-08 21:37:35	R_TpCFjYae6MDcTst					34.955596923828	-120.50270080566	anonymous	4	5		because I don't trust that contraception will always be used, and more importantly, the problem is the disease, not the pregnancy			1000		5		because I still don't trust that people will use the contraception (uinless you're talking about an implant). I'm pro-contraception and pro-abortion. My concern is that we should prevent the disease and its impact. So killing the mosquito/erradicating the disease matters most.			104		4	4	1	4	3	1	5	4	5	2	USA	64	6	4	2	2	2
2017-01-08 21:29:29	2017-01-08 21:38:45	0	174.221.142.69	100	555	1	2017-01-08 21:38:46	R_3dQHwWXbRgcPm5Q					41.794906616211	-87.970901489258	anonymous	4	6		I wouldn't want to create population issues by women not having babies.			208		6		I'd rather enable citizens to continue their family planning as is; maybe by the time Thomas is conceived, it's not as ideal of a time for the family			197		6	6	4	3	2	2	2	2	2	2	American	29	6	4	1	2	3
2017-01-08 21:23:52	2017-01-08 21:39:13	0	188.194.63.78	100	921	1	2017-01-08 21:39:15	R_2b3o8V0UakkHOqG					48.715698242188	11.518203735352	anonymous	4	2	Less humans -> less co2 -> less suffering		200				1	Again: less suffering		459				5	3	2	2	2	2	5	5	1	1	German	20	2	3	2	2	3
2017-01-08 21:35:55	2017-01-08 21:47:09	0	99.61.67.86	100	674	1	2017-01-08 21:47:10	R_1gRXhoKOksfc5DJ					30.174606323242	-97.950302124023	anonymous	4	7		Protects people trying to conceive, contraception often fails by people don't use it right + plus people who accidentally conceive but unwilling to abort			200		7		Same as my previous answer			200		6	3	3	3	4	4	2	2	2	2	USA	28	5	2	2	1	2
2017-01-08 21:29:41	2017-01-08 21:48:58	0	189.216.183.94	100	1157	1	2017-01-08 21:49:00	R_1FffrRtRSwUlJyZ					19.434204101562	-99.138603210449	anonymous	4	1	Mosquito repellent is often not very effective		201	1			1	The areas hit with Zika virus, often can benefit in more ways from a contraception program		201	1			4	6	6	1	1	1	4	4	4	1	mexican	24	5	2	1	2	1
2017-01-08 21:33:09	2017-01-08 21:49:58	0	75.130.207.12	100	1009	1	2017-01-08 21:49:59	R_3qQm6wToxA6nkT3					35.528305053711	-82.522499084473	anonymous	4	2	It also functions as birth control when desired, regardless of Zika, and I would expect it to be pretty effective. Repellent only has one function that might not work, at which point all funding was wasted.		300				2	We're not in a rush to populate the planet. If the woman can still have a healthy baby, it'd be better to delay it, and fund an option that gives women more power over their options. If funding repellent means a lack of birth control, then women have less choices.		500	1			4	4	7	4	4	7	2	2	2	1	Native American	25	4	1	2	2	2
2017-01-08 14:29:45	2017-01-08 22:01:16	0	172.56.4.107	100	27090	1	2017-01-08 22:01:17	R_30uhkz7BPOMtZvA					33.748992919922	-84.388000488281	anonymous	4	6		Repellent would still allow the population to reproduce, with a lower chance of the disease			510	1	6		Baby Tanya was born healthy and at the time the parents wanted				1	3	5	6	6	5	2	2	2	2	1	American	20	4	1	2	2	3
2017-01-08 21:58:11	2017-01-08 22:04:25	0	172.8.153.137	100	373	1	2017-01-08 22:04:26	R_3dwdSuwCnU8eDol					41.770095825195	-88.140403747559	anonymous	4	4							4							4	2	2	1	1	1	2	2	2	2	U. S. A.	53	6	1	2	1	2
2017-01-08 21:56:56	2017-01-08 22:05:11	0	176.199.213.183	100	495	1	2017-01-08 22:05:13	R_1LvCdlpmGZCR2Kw					50.952499389648	6.9571075439453	anonymous	4	7		with the repellant, women still have control of deciding to get pregnant. the contraception method essential forces people to delay, meaning some women may be too old to have children at all by the time the risk is over			101		7		Same reason as before. Women should, all other things being equal, be able to choose when they get pregnant. What if their partner dies while waiting for the risk to go away?			101		7	7	3	7	7	3	4	3	3	2	Canadian	38	6	1	2	2	3
2017-01-08 21:55:45	2017-01-08 22:09:04	0	68.13.24.133	100	798	1	2017-01-08 22:09:05	R_3Mu2UB8g52lhVRw					41.306900024414	-96.106399536133	anonymous	4	7		contraception may stop pregnancy but there are other morbidities with zika infection.			200		7		same reason given before. besides it makes no difference ultimately if the later baby is different from tanya.			101	1	6	3	3	1	2	2	2	2	2	2	india	67	6	1	2	1	3
2017-01-08 22:04:18	2017-01-08 22:10:06	0	60.240.73.201	100	347	1	2017-01-08 22:10:07	R_1QEZwE7SnO37XfM					-34.916702270508	138.64999389648	anonymous	4	7		Allows women to still choose to become pregnant.			278		7					554		6	7	7	1	1	1	2	2	2	2	Australian	48	5	4	2	1	2
2017-01-08 22:02:18	2017-01-08 22:13:01	0	85.144.182.3	100	642	1	2017-01-08 22:13:03	R_3pbhtLRcy8KsZYh					52.309906005859	4.8628997802734	anonymous	4	2	Contraception in form of preservatives or perhaps also other types also prevents STDs		101				2	Because contraception in form of condoms or perhaps other types also prevents other diseases, like STDs		101				2	2	3	2	2	1	4	4	4	1	Lithuanian	23	5	1	2	2	2
2017-01-08 22:05:26	2017-01-08 22:25:38	0	189.173.106.209	100	1212	1	2017-01-08 22:25:40	R_0rcI6Adi2MRLbZ7					29.066696166992	-110.96669769287	anonymous	4	7		Considering women who are already pregnant and women who do not actively decide to get pregnant. The mosquito repellant would help all. And mosquitoes also cause other diseases, so it would help with those too.			200		7		It doesn't take away the woman's power to choose when to get pregnant and it protects her in case she does get pregnant against her will.			200		3	3	3	1	1	1	4	3	3	2	Mexican	33	6	2	2	1	3
2017-01-08 22:12:55	2017-01-08 22:32:21	0	82.38.229.7	100	1166	1	2017-01-08 22:32:23	R_2ByRwIP8e7ZvT1g					51.350006103516	-0.14999389648438	anonymous	4	6		Allows the woman to make an informed choice to get pregnant			1000	1	7		If mosquito repellant can avoid the majority of cases - women can still consider having a child				1	1	4	6	2	3	3	2	2	2	2	British	31	5	2	2	1	1
2017-01-08 22:07:19	2017-01-08 22:33:05	0	60.227.248.13	100	1545	1	2017-01-08 22:33:07	R_2YkQbhsvyrbTBxS					-33.683303833008	150.86669921875	anonymous	4	2	The decease isn't the real problem it is becoming pregnant while infected with the virus. Reduce the pregnancies and you reduce the microcephaly		301				1	Contraception still protects the women and there children from developing microcephaly and all the associated health and financial issues associated with that. An argument about potential future children is flawed as these hyperthetical children do not exist so making decisions based on their potential existence is immoral as a government is responsible for protecting its populating and ensuring …		302				4	5	3	1	1	1	2	2	2	2	Australian	32	6	1	2	2	2
2017-01-08 22:20:44	2017-01-08 22:33:28	0	73.199.255.247	100	764	1	2017-01-08 22:33:30	R_2wyLvyM9ydkjKpu					40.816192626953	-74.216400146484	anonymous	4	6		because the question is dumbed in the first place				1	6		fuck off				1	4	4	4	2	2	2	4	4	4	1	french	37	2	1	2	2	2
2017-01-08 22:15:11	2017-01-08 22:36:30	0	50.29.181.100	100	1279	1	2017-01-08 22:36:32	R_Au0kRPv1HCIAbND					40.958801269531	-75.300598144531	anonymous	4	3	Contraception would also mean less pregnancies, therefore less future humans. Less people is better for the planet.		110				3	Less humans.		110				7	2	2	1	1	1	2	2	2	1	American	28	1	1	2	2	3
2017-01-08 19:37:51	2017-01-08 22:37:55	0	75.82.104.252	100	10803	1	2017-01-08 22:37:56	R_cZSsBIv6lsMNsrv					34.118194580078	-118.67390441895	anonymous	4	7		I have a strong belief that contraception is morally wrong.			300		7		I have a strong belief that contraception is morally wrong.			300		1	1	1	1	1	1	5	5	5	1	United States of America	21	4	4	1	2	1
2017-01-08 22:29:24	2017-01-08 22:42:22	0	73.159.221.8	100	778	1	2017-01-08 22:42:23	R_eKVFzcV6L68tUk1					41.746704101562	-70.068801879883	anonymous	4	6		Because that would not delay or inconvenience the woman who is trying to get pregnant, plus some religions prevent using contraception and this would be a more universal way to prevent the disease			151		6		Because assuming the entire population of woman looking to become pregnant delayed their pregancy it could create difficulties with the population distribution			151		3	3	3	2	5	2	4	4	4	2	White	18	2	1	2	2	3
2017-01-08 22:27:57	2017-01-08 22:43:42	0	49.183.160.252	100	944	1	2017-01-08 22:43:43	R_DvrdK9A2OJhukZX					-37.810302734375	144.95440673828	anonymous	4	4							6		It seems more natural than delaying births			151		4	4	3	3	3	2	2	2	2	2	Australian	32	6	5	2	2	1
2017-01-08 22:34:23	2017-01-08 22:44:49	0	77.172.85.182	100	626	1	2017-01-08 22:44:52	R_25sEwyy7Xa3qcZi					52.204605102539	5.9375	anonymous	4	7		I am agains propagating contraception			910	1	7		For the same reason stated in the previous question: the repellent is not going to affect what people are born			1000		3	6	6	6	6	5	3	2	2	2	Ukrainian	22	5	1	2	2	1
2017-01-08 21:58:44	2017-01-08 22:47:02	0	193.190.253.150	100	2897	1	2017-01-08 22:47:04	R_3PmMVQce5xdOV4I					50.879592895508	4.7008972167969	anonymous	4	3	Well, I think I changed my mind - free contraception would be in any case useful (avoiding unwanted prenancies), but the problem is, is does not protect women, who are already pregnant.		101				7		As I said previously, Mosquito repellent protects already pregnant woman, while contraception not (which is in any case useful and advantageous), but as a someone who has power to prevent already developing human fetus (I suppose we´re talking about pregnancies, when abortion is no longer possible) from having microcephaly and severe brain malfunctions, I would choose Mosquito repellent.			566		4	4	3	6	4	3	4	4	4	2	Slovak	26	6	5	2	2	2
2017-01-08 22:36:08	2017-01-08 22:47:59	0	189.216.113.104	100	711	1	2017-01-08 22:48:01	R_3fMHwLYi12AvuLc					19.434204101562	-99.138603210449	anonymous	4	7		Respects women's reproductive rights			147		7		Respect for women's reproductive rights			151		3	2	2	1	1	1	4	3	3	2	Mexican	42	5	2	1	1	2
2017-01-08 22:51:01	2017-01-08 22:56:42	0	61.69.167.74	100	341	1	2017-01-08 22:56:43	R_2EE4j1YbPIUUEkC					-33.880996704102	151.07989501953	anonymous	4	5		to preserve a woman's choice on whether or not to become pregnant. Because not all women will take contraception. Because contraception fails.			200		5		preseves womens choice over pregnanccy			200		6	4	2	1	1	1	2	2	2	2	Australian	46	6	1	2	1	2
2017-01-08 22:46:42	2017-01-08 22:56:47	0	99.95.102.223	100	605	1	2017-01-08 22:56:48	R_29oBdPYGt0P8Dti					34.112106323242	-118.15640258789	anonymous	4	5		Making an assumption that more people are likely to regularly use mosquito repellent than contraception.			101		4							7	7	7	5	4	2	4	2	2	1	British	42	6	1	2	2	3
2017-01-08 22:46:28	2017-01-08 22:59:36	0	213.114.44.218	100	787	1	2017-01-08 22:59:37	R_30c7gHcGx20p2MJ					59.850006103516	17.63330078125	anonymous	4	6		Because then people could continue having babies as they wish. A lot of people have difficulties getting pregnant and contraception would not be the answer for them.			101		6		Because then you can have children whenever you want to and not having the pregnancy delayed. That is important for people having issues getting pregnant.			101		6	5	3	6	3	2	4	4	4	2	Swedish	33	6	2	2	2	3
2017-01-08 22:51:04	2017-01-08 23:03:09	0	37.24.159.60	100	725	1	2017-01-08 23:03:10	R_3nTKNgdWrgUIHQa					51.516098022461	7.4683074951172	anonymous	4	7		Contraception influences people's life in a completely unrelated manner while it does not in any way help with the desease itself			1000	1	7		Still the same			430	1	4	3	4	1	1	1	2	2	1	2	German	28	6	2	1	2	3
2017-01-08 23:02:25	2017-01-08 23:13:21	0	67.70.142.68	100	656	1	2017-01-08 23:13:23	R_O9DI8IYORAZoGMV					45.399993896484	-71.900001525879	anonymous	4	4							5		It leaves people the opportunity to have children whenever they want			101		6	6	6	1	3	1	2	2	2	1	Canadian/québécois	20	4	2	2	2	2
2017-01-08 23:09:11	2017-01-08 23:20:36	0	69.119.69.183	100	684	1	2017-01-08 23:20:37	R_2X5U8wz3tLmOXr8					40.704803466797	-73.650100708008	anonymous	4	6		Most people that aren't using contraception probably aren't going to start using it to 'mabye' prevent Zika infection,			693	1	6		People that choose not to use contraception will probably not change their habits because of status issues, the way contraception feels/costs etc				1	7	7	6	6	6	5	2	2	2	2	American	49	5	4	2	1	3
2017-01-08 23:14:47	2017-01-08 23:24:34	0	68.174.48.253	100	586	1	2017-01-08 23:24:35	R_27IslKdCdrnS2AW					41.537506103516	-74.051200866699	anonymous	4	5		There may be women that choose to have a baby, are already pregnant or accidentally fall pregnant and this will provide them some protection.			152		5					152		4	4	4	3	3	3	2	2	2	2	US	34	6	3	2	1	1
2017-01-08 23:25:47	2017-01-08 23:35:24	0	70.71.15.114	100	576	1	2017-01-08 23:35:25	R_8nUgEsth1GMvRZL					49.216705322266	-122.91670227051	anonymous	4	1	I thought that contraception has lower fail rate		789				4							1	1	1	1	1	1	4	4	4	2	Serbian	49	5	1	2	1	2
2017-01-08 23:26:11	2017-01-08 23:46:00	0	195.147.253.123	100	1188	1	2017-01-08 23:46:01	R_1FyuKwE35Ai9K0A					51.496398925781	-0.12240600585938	anonymous	4	5		As they are equally effective, the repellant reaches those women who for whatever reason don't think they need contraception protection. It would help women who ARE trying to get pregnant, when it suits them, and it would protect those women not trying to get pregnant, by default, like rape victims. It's important to not choose a method that regulates a woman's life choices with her body over the…			358		6		Again, the reasons a woman gets pregnant and carries a child to term are hers. Regulating when and how a woman gives birth is not the government's job. The job of the government is to support a citizen's legal choices, whether they are female or male, young or old. If the question is whether a girl baby or a boy baby are more agreeable to the survey taker...hmmm, that's a question you can't trick…			358		6	3	4	2	2	2	4	3	3	2	UK	55	6	3	2	2	3
2017-01-08 23:45:29	2017-01-08 23:59:14	0	113.61.73.116	100	825	1	2017-01-08 23:59:16	R_Zxh0ABRBkIvr1xT					-37.828598022461	145.00769042969	anonymous	4	1	More easily incorporated in daily routine, less likliehood of forgetting or missing part of your skin, directly linked to childrbirth		110	1			4							6	6	3	5	5	2	2	2	2	2	Australian	51	6	3	2	1	2
2017-01-08 23:49:45	2017-01-08 23:59:27	0	50.245.128.227	100	582	1	2017-01-08 23:59:29	R_3g5AqW20PMWWZPL					47.610198974609	-122.30429840088	anonymous	4	7		Because mosquito repellent prevents other harmful diseases, whereas only condoms prevent STIs, and only some STIs			501	1	7		Same reason as before				1	4	4	4	2	2	2	3	3	3	1	American	25	5	1	2	2	3
2017-01-08 23:50:55	2017-01-08 23:59:53	0	107.77.225.8	100	538	1	2017-01-08 23:59:55	R_3KrpKZZ4zKsao43					40.70100402832	-73.810302734375	anonymous	4	4							4							6	2	2	2	3	2	2	2	2	1	Indian	32	6	5	2	2	3
2017-01-08 23:54:48	2017-01-09 00:04:59	0	119.76.28.102	100	610	1	2017-01-09 00:05:01	R_2QzdZVDg1vEdCqB					13.816696166992	100.75	anonymous	4	5		Because mosquitos also carry other diseases, not just Zika.			111		5		same reason as before			111		3	1	2	3	2	2	5	4	4	2	Thai	26	5	3	2	2	3
2017-01-08 23:52:23	2017-01-09 00:05:00	0	69.5.131.1	100	756	1	2017-01-09 00:05:02	R_1Ivmcx3ic8epWAj					42.029998779297	-93.59049987793	anonymous	4	5		Mosquito repellent could help women who are already pregnant.			101		5		Mosquito repellent would help those who are currently pregnant or wish to have babies soon instead of waiting.			150		5	4	4	5	2	2	3	3	3	2	American	22	4	1	2	2	2
2017-01-08 23:59:57	2017-01-09 00:08:43	0	121.44.210.248	100	525	1	2017-01-09 00:08:45	R_3kk6YNn9kA0gXIq					-33.87939453125	151.21929931641	anonymous	4	7		Because falling pregnant should be an option for those who want to, and funding the mosquito repellent helps more than just pregnant women and foetuses			101		4							2	2	3	2	3	2	4	3	3	2	Australian	24	5	1	2	2	2
2017-01-09 00:02:48	2017-01-09 00:20:45	0	155.94.199.6	100	1076	1	2017-01-09 00:20:47	R_1E3YqFDoxXHJktQ					34.049392700195	-118.26409912109	anonymous	4	5		Because forcing women to be sterile, even temporarily, sounds authoritarian. Giving them the means to protect themselves and chose to be pregnant, even if there is a risk, sounds fairer			126	1	5		Because to give women the choice to decide on the time of their pregnancy is the right thing to do			126		2	5	5	1	4	3	2	2	2	2	French	48	6	1	2	2	2
2017-01-09 00:16:49	2017-01-09 00:35:30	0	31.48.84.211	100	1121	1	2017-01-09 00:35:32	R_1mDjAEYlhaj5g9E					50.899993896484	-1.3999938964844	anonymous	4	2	Contraception is useful in other ways; repellent is chemical and unlikely to be healthy.		101				2	Contraception has possible further benefits; repellent will likely have health drawbacks.		101				6	6	2	2	2	2	4	3	3	1	British	47	6	1	2	1	2
2017-01-09 00:31:23	2017-01-09 00:37:01	0	71.232.21.30	100	337	1	2017-01-09 00:37:02	R_2CcXtt7kS9ZsX4r					42.348403930664	-71.155097961426	anonymous	4	4							4							3	2	3	3	1	1	4	4	4	1	US	48	6	1	2	2	3
2017-01-09 00:26:29	2017-01-09 00:39:48	0	64.30.118.41	100	798	1	2017-01-09 00:39:51	R_2aFUPDKE0ZX8Meh					38.408798217773	-121.37159729004	anonymous	4	4							4							4	2	5	1	1	1	3	3	3	2	US American	23	4	1	2	2	2
2017-01-09 00:33:52	2017-01-09 00:42:17	0	104.238.45.67	100	505	1	2017-01-09 00:42:19	R_2AYKhFc0wffHzVR					38.72590637207	-75.16780090332	anonymous	4	6		Human rights outweigh Mosquito.			600	1	6		I consider Tanya has rights to live.			620	1	4	5	5	5	5	5	1	1	1	1	China	21	5	4	2	2	3
2017-01-09 00:49:32	2017-01-09 00:56:50	0	107.77.164.49	100	438	1	2017-01-09 00:56:52	R_zebq9QE9vZ62LUl					37.751007080078	-97.821998596191	anonymous	4	4							4							7	7	4	4	4	4	2	2	2	2	American	50	5	1	2	2	2
2017-01-09 00:49:32	2017-01-09 00:58:49	0	68.61.185.2	100	557	1	2017-01-09 00:58:51	R_3gREpvCy94bfpRC					42.745300292969	-83.272598266602	anonymous	4	6		Contraception will not stop zika from infecting current pregnancies.			765		4							3	3	2	3	2	2	2	2	2	1	Usa	34	6	3	2	1	3
2017-01-09 01:02:19	2017-01-09 01:09:51	0	24.91.32.223	100	451	1	2017-01-09 01:09:53	R_2s3eGuHcd0C5NgR					42.165802001953	-70.95059967041	anonymous	4	1	Long term emotional social and medical considerations,			1			1	Same reasons, not sure if repellent is toxic?			1			1	2	2	3	3	1	5	2	3	2	American	47	5	1	2	2	3
2017-01-09 00:57:24	2017-01-09 01:10:48	0	50.132.18.76	100	804	1	2017-01-09 01:10:50	R_e2smr2rJYRrIyn7					47.746398925781	-117.25489807129	anonymous	4	2	Failure rate of repellant. Seems user error could more likely come into play. Preventing pregnancies in the first place seems more direct and logical		215				4							3	3	2	3	2	1	5	5	5	2	United States citizen	41	5	3	2	2	2
2017-01-09 00:57:24	2017-01-09 01:11:30	0	82.33.159.31	100	846	1	2017-01-09 01:11:31	R_2P54YxRNwXf4TpH					54.988098144531	-1.6194000244141	anonymous	4	2	Contraception only affects the user. Repellant affects ghe mozzies and the environment.		201				2	Same reasons. Fictional 'future people' are not something that influences my policy decisions.		201				4	3	5	4	2	2	2	2	2	1	British	36	5	4	2	2	3
2017-01-09 01:04:40	2017-01-09 01:14:20	0	177.81.58.86	100	579	1	2017-01-09 01:14:21	R_3sjM6PXk1E5MnwI					-23.473297119141	-46.665802001953	anonymous	4	6		It stops the disease vector that also affects other people			479		7		It stops the disease vector and protects other people as well			484		3	2	3	5	3	2	5	5	2	1	Brasil	60	5	3	2	1	3
2017-01-09 01:08:01	2017-01-09 01:16:06	0	109.152.166.111	100	484	1	2017-01-09 01:16:07	R_2w1clIcQtuXKbHX					54.869400024414	-6.50390625	anonymous	4	3	reppellent won't have the 99% safety rating that contraception does		501				3			501	1			7	5	5	3	2	2	3	3	3	2	British	33	6	3	2	2	2
2017-01-09 01:01:39	2017-01-09 01:17:07	0	173.81.83.102	100	927	1	2017-01-09 01:17:08	R_2cB048I7zoJjLnC					39.328002929688	-81.525497436523	anonymous	4	1	Preventing conception altogether would be more effective than preventing infection of already-pregnant women.		101				4							2	2	2	1	1	1	2	2	2	2	American	49	5	1	2	2	2
2017-01-09 01:08:36	2017-01-09 01:20:44	0	130.132.173.183	100	728	1	2017-01-09 01:20:46	R_1lazlZorLnl0Qch					41.30940246582	-72.924003601074	anonymous	4	7		Enable families the right to chose when they have children; assume that nets will more readily be used considering how few people use condoms as it is; support the health of pregnant women and their unborn child			501		7		Again, to support the right to chose and to protect the rights of mother and child			499		4	2	4	4	1	4	2	2	2	2	Caucasian	37	6	1	2	2	3
2017-01-09 01:10:10	2017-01-09 01:21:46	0	24.251.117.250	100	695	1	2017-01-09 01:21:47	R_3MSRSfzzsB0Ysz2					33.507598876953	-112.05829620361	anonymous	4	2	Better to have no chance of pregnancy than to have a small chance of mosquito exposure.		101				4							7	7	7	5	1	3	2	2	2	2	USA	69	6	3	2	2	2
2017-01-09 00:15:19	2017-01-09 01:23:08	0	71.230.244.46	100	4068	1	2017-01-09 01:23:10	R_2YS0AjWz8oY4uU6					40.04020690918	-75.533203125	anonymous	4	4							4							3	2	2	2	2	2	2	2	2	2	US	50	6	5	1	1	2
2017-01-09 00:50:32	2017-01-09 01:26:25	0	67.182.62.235	100	2152	1	2017-01-09 01:26:26	R_3PbOGMxVUJCgxoi					36.887405395508	-119.76969909668	anonymous	4	2	it may help prevent unwanted pregnancies			1			2	avoid unwanted kids			1			4	3	2	1	1	1	3	3	3	2	indian	39	6	1	2	1	1
2017-01-09 01:17:43	2017-01-09 01:26:32	0	201.37.199.152	100	529	1	2017-01-09 01:26:34	R_23fvRt9iVnXCpv5					-22.88639831543	-43.203704833984	anonymous	4	1	Sounds less risky.		101				4							2	2	2	2	1	1	2	2	2	1	Brazilian	37	6	3	2	2	1
2017-01-09 01:13:09	2017-01-09 01:28:31	0	59.182.99.118	100	921	1	2017-01-09 01:28:33	R_2qlU7MVM1ojkM4y					18.975006103516	72.825805664062	anonymous	4	1	Added benefit of delayed/reduced childbirth, better for the country.		101				1	There is no difference between a Tanya and a Thomas to the state		101				1	1	1	1	1	5	5	5	1	1	Indian	19	4	1	2	2	2
2017-01-09 01:14:20	2017-01-09 01:34:38	0	186.224.172.149	100	1218	1	2017-01-09 01:34:39	R_2y9l2quX6DNzAHc					-23.346694946289	-47.848403930664	anonymous	4	6		The repellent would interfere less in the life of the people. Contraception would require that families changed their plans.			150		6		Because the repellent would intefere less in the planning of the families. Also it could generate a period of the year in which babies are not born, the consequences for thhis in the future are unknown.			115		3	3	2	7	2	2	3	3	3	1	Brazilian	27	6	1	2	2	2
2017-01-09 01:30:10	2017-01-09 01:41:45	0	174.209.4.119	100	694	1	2017-01-09 01:41:46	R_3rPbSkJUek1y5sg					39.731292724609	-104.96920013428	anonymous	4	2	Seems more mathematically/statistically effective and lower risk of having Zika spread to infants		116				2	It is still safer to ensure people user contraception than ensure they use repellant		116				6	7	2	6	3	2	4	4	4	1	USA	27	6	3	2	2	1
2017-01-09 01:02:19	2017-01-09 01:41:46	0	50.138.8.218	100	2366	1	2017-01-09 01:41:47	R_rjWxuORSk5c4oox					25.927398681641	-80.180099487305	anonymous	4	6		because some women may choose to become pregnant, or be of an age where they are unable to delay pregnancy.			201		6		same as last reason.			202		6	6	2	2	2	2	2	2	2	1	USA	39	5	2	2	1	3
2017-01-09 01:31:27	2017-01-09 01:46:52	0	184.55.37.85	100	924	1	2017-01-09 01:46:53	R_12ls4TFRix0FAc5					42.57470703125	-88.394599914551	anonymous	4	1	Seems safer for baby.		101				7		Because of your prior statements. Doctors first...do no harm.				1	4	4	4	6	4	2	5	3	4	2	American	64	5	3	2	1	1
2017-01-09 01:38:36	2017-01-09 01:49:37	0	78.175.253.119	100	660	1	2017-01-09 01:49:38	R_1pDyUUvZhk07bt5					41.021392822266	28.968399047852	anonymous	4	7		Does it mean denying women their rights? Your question might be ill structured			101		1	Are you joking?		101				4	4	4	1	1	4	5	4	4	2	Turkish	38	6	5	2	2	2
2017-01-09 01:34:02	2017-01-09 01:52:08	0	98.219.188.189	100	1085	1	2017-01-09 01:52:09	R_1jf89QrdG3YIcMZ					40.463897705078	-79.946800231934	anonymous	4	2	Who knows the risks from chemicals in mosquito repellant		101	1			2	What you're talking about is not true. Girl or a boy, its random. Who cares the bablies will get changed becoming pregnant now or later		101	1			3	2	2	2	2	2	2	2	2	1	indian	30	6	1	2	2	1
2017-01-09 01:46:23	2017-01-09 01:52:18	0	24.104.139.205	100	354	1	2017-01-09 01:52:19	R_2s6ypnH6XD32akd					38.577102661133	-122.44110107422	anonymous	4	1	Higher likelihood of preventing the infection of a fetus if the fetus doesn't exist due.		150				4							7	3	3	2	2	2	4	2	3	2	american	40	5	1	2	2	3
2017-01-09 01:46:40	2017-01-09 01:54:59	0	47.215.231.186	100	499	1	2017-01-09 01:55:01	R_Z4Pus80lugY2Oo9					34.947692871094	-111.9395980835	anonymous	4	6		Treats the problem directly fir those that want to have a baby			201		6		Allows choice			202		5	3	4	2	2	3	2	2	2	1	Usa	60	6	3	2	2	2
2017-01-09 01:52:07	2017-01-09 01:58:41	0	198.168.101.193	100	394	1	2017-01-09 01:58:43	R_2S2i9CxW85y5sCG					45.558303833008	-73.570098876953	anonymous	4	1	not sure mosquito repellent is actually "safe and effective", and contraception has added benefits		201	1			2	same. Changing which babies are born isn't really a bad thing		202	1			7	7	7	1	1	1	4	1	1	3	canadian	35	5	2	2	1	2
2017-01-08 20:54:08	2017-01-09 02:00:41	0	73.140.16.221	100	18392	1	2017-01-09 02:00:42	R_3sAn83CXv9Qh3i7					47.901504516602	-122.18440246582	anonymous	4	4							4							6	3	3	3	3	2	2	2	2	1	American	39	5	2	2	1	2
2017-01-09 01:50:01	2017-01-09 02:01:04	0	82.28.56.255	100	663	1	2017-01-09 02:01:05	R_3kHU1YcDn1aMJSd					53.399993896484	-2.1499938964844	anonymous	4	7		Does not affec reproductive rights and covers accidental pregnancy.			799		7		Respects personal autonomy of the mother.			554		6	6	3	3	3	3	2	2	2	2	British	31	6	3	2	2	2
2017-01-09 02:05:06	2017-01-09 02:15:42	0	73.128.72.183	100	636	1	2017-01-09 02:15:44	R_2ZDIuTg4zwFF14G					38.921295166016	-77.038597106934	anonymous	4	3	Because of the time element. Pregnancy can happen now, the mosquito bite possibly in a week.		205				3	Again, because of the time element.		185				4	3	2	3	2	2	3	3	3	2	US	73	6	1	1	1	1
2017-01-09 01:58:53	2017-01-09 02:18:40	0	111.125.206.184	100	1187	1	2017-01-09 02:18:41	R_2pXcYGafaXp0yKg					12.983306884766	77.583312988281	anonymous	4	1	Women would be more in control of what happens.		199	1			1	We anyway do not have control over which baby comes into this world. With contraception women are more in control of what happens.		200	1			7	7	3	1	1	4	5	5	4	1	Indian	36	6	1	1	2	2
2017-01-09 02:14:22	2017-01-09 02:22:25	0	204.28.127.151	100	483	1	2017-01-09 02:22:26	R_1gdxTo7JJjHFXfa					37.76969909668	-122.39329528809	anonymous	4	6		Having a child is a human right. If the two cases have the same efficacy, then you should prefer the approach that preserves rights.			299		6		Same reason as before. Changing the babies that would exist is not an idea that has any merit.			101		2	2	2	1	1	1	5	5	3	1	American	31	5	3	2	2	2
2017-01-09 02:18:56	2017-01-09 02:28:59	0	67.189.52.221	100	603	1	2017-01-09 02:29:00	R_2tyvUFBVfXUYxGE					45.402297973633	-122.61470031738	anonymous	4	1	I prefer less people in the world anyway		1000	1			1	Contraception reduces people in the world.			1			4	4	3	3	3	2	4	4	4	1	American	40	4	1	2	2	3
2017-01-08 13:54:34	2017-01-09 02:30:54	0	107.147.169.248	100	45380	1	2017-01-09 02:30:55	R_3I3MRnOMMsecIO7					39.822692871094	-86.144996643066	anonymous	4	4							4							3	3	6	3	2	2	3	3	3	2	USA	36	5	1	2	2	3
2017-01-09 02:22:32	2017-01-09 02:31:41	0	198.145.74.83	100	548	1	2017-01-09 02:31:42	R_31AaNa4xy6UlBpy					45.550796508789	-122.73770141602	anonymous	4	1	Contraception also solves a lot of other problems.		1000	1			1	Contraception solves other problems as well.		1000	1			4	1	4	1	1	1	4	4	4	2	USA	59	5	3	2	2	2
2017-01-09 02:09:23	2017-01-09 02:32:33	0	191.178.133.178	100	1390	1	2017-01-09 02:32:35	R_3rTxsu90v98Sj7Q					-1.4499969482422	-48.483306884766	anonymous	4	5		We should not chose a solution to avoid the people's rights.			1000		5		Same before answer.l it			1000		3	3	6	1	1	1	2	2	2	1	Brazilian	40	6	3	2	1	3
2017-01-09 02:20:45	2017-01-09 02:32:53	0	179.209.40.233	100	728	1	2017-01-09 02:32:55	R_2Ecae6M5wbwImQQ					-23.473297119141	-46.665802001953	anonymous	4	5		Mosquitos may carry other diseases such as dengue.			101		5		that is the option which allows for the decision of having the baby whenever you feel like it			101		3	3	3	2	2	3	4	4	4	1	Brazilian	34	6	5	2	1	2
2017-01-09 02:31:04	2017-01-09 02:35:33	0	71.236.153.161	100	268	1	2017-01-09 02:35:34	R_DqqJ0ME2VJVzlZv					45.610305786133	-122.74549865723	anonymous	4	6		It's effective for everyone, not just contraception, and we don't know the long-term effects of Zika.				1	6		Same reasons as before.				1	7	7	7	5	2	2	2	2	2	2	American	33	5	2	2	1	1
2017-01-09 02:28:55	2017-01-09 02:36:54	0	203.167.202.140	100	478	1	2017-01-09 02:36:56	R_3iEZHI63m5UdoHm					-41.305297851562	174.77899169922	anonymous	4	6		Because some women may be prevented from using contraception by their religion or families - mosquito repellant will be an option for all women			101		4							3	3	2	4	2	1	4	3	3	2	New Zealander	38	6	1	2	2	3
2017-01-09 02:39:32	2017-01-09 02:50:59	0	157.48.183.49	100	686	1	2017-01-09 02:51:01	R_3ma8Y4T1nBKe98J					17.375305175781	78.474395751953	anonymous	4	3	Problem is conceiving. So attack the problem.		101				7		If both are equally effective. People should be given freedom to chose when to make babies.			101		4	3	2	1	1	3	5	4	4	1	Indian	29	6	3	2	2	2
2017-01-09 02:41:21	2017-01-09 02:54:05	0	68.173.225.177	100	763	1	2017-01-09 02:54:06	R_1NmiGbaQDPzUN4L					40.731704711914	-73.988502502441	anonymous	4	1	I chose contraception over mosquito repellent because I believe it would be more sure to prevent conception		120				5		Because, in response to the information you supplied, I would now believe it would be safer to use mosquito repellent			120		5	4	4	2	2	2	2	2	2	2	American	73	6	3	2	1	1
2017-01-09 02:50:06	2017-01-09 02:54:28	0	45.56.42.191	100	262	1	2017-01-09 02:54:30	R_2QVxKzFlcHqEb8m					40.22639465332	-111.69699859619	anonymous	4	4							4							4	4	4	4	4	4	4	4	4	1	American (US)	35	6	5	2	1	3
2017-01-09 02:47:25	2017-01-09 02:57:16	0	99.246.200.39	100	591	1	2017-01-09 02:57:17	R_xzV4SdTndI928Lf					43.673599243164	-79.403503417969	anonymous	4	5		Contraception only helps those who are not already pregnant.			300		5		Mosquito repellent allows women to choose the timing of their pregnancy. There may be other factors or circumstances in their lives that make pregnancy favorable during that time period.			200		2	4	3	1	1	1	3	2	2	2	Canada	37	4	3	2	1	2
2017-01-09 02:47:15	2017-01-09 02:59:57	0	74.206.90.177	100	761	1	2017-01-09 02:59:58	R_1OMOpiRacdozFMG					35.884506225586	-79.554397583008	anonymous	4	2	Don't like the environmental and health risks of pesticides		110				2	Environmental concerns.		110				3	3	3	3	3	3	2	2	2	2	USA	35	6	3	2	1	3
2017-01-09 02:43:02	2017-01-09 03:01:06	0	137.97.194.136	100	1084	1	2017-01-09 03:01:08	R_2e2801JWiqLn98m					9.9667053222656	76.233306884766	anonymous	4	7		because i know contraception wouln't be effective.				1	7		contraception will not be as effective as mosquito repellent because of people's attitue to sex. moreover mosquito repellent woul serve the community as well.				1	1	1	1	1	1	1	5	5	5	1	Indian	60	6	3	1	1	3
2017-01-09 02:57:22	2017-01-09 03:02:16	0	160.96.214.144	100	293	1	2017-01-09 03:02:18	R_OdsKghTCMcYuP97					1.2855072021484	103.85650634766	anonymous	4	1	Zika is not harmful for individuals that are not pregnant.		1000	1			1	You can not want, or miss what you do not know.			1			1	1	1	1	1	1	2	2	2	1	Singaporean	26	5	1	2	2	1
2017-01-09 02:46:31	2017-01-09 03:03:04	0	87.16.125.52	100	993	1	2017-01-09 03:03:06	R_1gkdKyemcxvDFTZ					43.779296875	11.246307373047	anonymous	4	2	It seems to be a more effective solution on the long term; it would then also be available to women who otherwise may not be able to purchase it.		201	1			2	The number of contingencies that determine person A is born instead of a hypotetical person B is infinite. You do not know any of these individuals in advance, they are mere possibilities. Contraception still seems to be the most reasonable and readily available solution.			1			4	3	3	6	4	3	2	2	2	3	Italian	23	5	5	1	2	2
2017-01-09 02:55:14	2017-01-09 03:09:17	0	59.182.127.243	100	842	1	2017-01-09 03:09:19	R_3EiMhSMgP7s8NTA					18.975006103516	72.825805664062	anonymous	4	7		Fights disease, keeps population healthy			991	1	7		Respects health of the woman, fights disease at primary stage, will avoid other mosquitoes borne diseases for a wider population			999	1	7	7	7	1	1	1	4	4	2	1	Indian	54	6	1	2	1	1
2017-01-09 03:01:00	2017-01-09 03:09:28	0	108.15.17.204	100	508	1	2017-01-09 03:09:29	R_sTJjzH8nmYhrG3T					38.941299438477	-76.491500854492	anonymous	4	7		less personally invasive			101		6		less invasive, delay may imply "different" children, but doesn't necessarily mean worse			101		3	5	3	2	2	2	2	2	2	1	American	33	4	4	2	2	3
2017-01-09 02:45:53	2017-01-09 03:11:54	0	73.26.251.199	100	1561	1	2017-01-09 03:11:55	R_2EgUC23hcrMd1KR					35.239303588867	-106.62550354004	anonymous	4	1	While contraception is not 100% effective, it would seem to be more effective in preventing pregnancy than mosquito repellent is at preventing mosquito bites. The chemicals in mosquito repellant carry risks as well.		150				1	Same answer as previously. In addition i believe women should be able to choose when to become pregnant.			1			3	4	6	7	1	1	2	2	2	2	USA	59	5	3	2	1	1
2017-01-09 03:08:29	2017-01-09 03:14:28	0	73.36.165.73	100	358	1	2017-01-09 03:14:29	R_31pHZqUdvnurkB4					41.801406860352	-87.60050201416	anonymous	4	7		Free will			633	1	7					101	1	2	3	5	2	2	2	2	2	2	2	American	34	6	5	2	2	3
2017-01-09 03:03:36	2017-01-09 03:15:55	0	106.51.134.44	100	739	1	2017-01-09 03:15:57	R_s89vX3Znv22dWQp					12.983306884766	77.583312988281	anonymous	4	6		I don't believe all susceptible women will necessarily use contraception, as it is their choice not to, whereas mosquito repellent can be more strictly enforced, and thus be more effective.			101		5		If repellent and contraception are equally effective, then the right approach should be the one that intervenes with people the least.			110		2	1	1	2	1	1	4	4	4	1	American	30	6	3	2	2	2
2017-01-09 02:44:34	2017-01-09 03:16:11	0	99.30.173.220	100	1896	1	2017-01-09 03:16:12	R_1geeYbmC2TsKCa0					32.991394042969	-96.664497375488	anonymous	4	3	prevention of both microcephaly and environmental contamination by chemical spray.		564				2	more natural non chemical solution which would not endanger the environment.		561				6	6	2	1	1	1	4	4	4	2	American	70	6	1	2	1	3
2017-01-09 03:11:28	2017-01-09 03:21:25	0	108.70.156.102	100	596	1	2017-01-09 03:21:26	R_2TzWS60GQm5FKpV					33.998901367188	-117.44079589844	anonymous	4	2	I trust women to make rational choices about their bodies and health.		898				2	Again I trust women to rational choices about their bodies and health		891				4	4	3	6	6	4	2	2	2	1	American	30	5	4	1	2	2
2017-01-09 02:39:05	2017-01-09 03:21:38	0	125.239.155.125	100	2552	1	2017-01-09 03:21:39	R_AvyNcQP9Y4Ewbnj					-36.86669921875	174.76669311523	anonymous	4	6		There is no knowing how long the Zika virus will last, so the delay may be indefinite, and women may not want to wait so long before having children. Mosquito repellent is a less disruptive solution to people's lives.			150		6		Again, it is less disruptive to everyday life as people can still choose to have children when they like and without delay. Many small, day-to-day choices change which babies could have existed in the future; contraception is of no greater significance than those choices.			150		5	4	3	4	5	3	2	2	2	2	NZ	20	4	4	1	2	1
2017-01-09 03:21:06	2017-01-09 03:26:52	0	100.38.252.193	100	345	1	2017-01-09 03:26:53	R_1hQo9iZs6dRTfTw					40.675994873047	-73.962898254395	anonymous	4	7		The social cost of this solution is lower			400		7		Duh			402		5	7	3	1	1	1	4	3	3	2	Usa	27	6	1	2	2	3
2017-01-09 03:20:07	2017-01-09 03:31:16	0	71.48.19.255	100	668	1	2017-01-09 03:31:17	R_29aXaIjUJDYlCZT					35.226806640625	-78.956199645996	anonymous	4	7		It works for everyone, not just women. It would stop the outbreak faster.			101		7		Same as before. If they are equally effective, the repellent is better because fewer people get the virus.			101		3	4	5	5	6	3	2	2	2	2	USA	54	6	3	2	1	1
2017-01-09 03:22:53	2017-01-09 03:31:21	0	58.167.57.141	100	508	1	2017-01-09 03:31:24	R_wSLnHu1qeVMqwOB					-33.027404785156	151.66009521484	anonymous	4	6		It is less invasive and has less risk factors (ie. not taking the contraception correctly)			201		6		Have already answered this question previously.			230		6	5	6	2	2	3	4	4	3	2	Australian	29	6	1	2	2	2
2017-01-09 03:39:39	2017-01-09 03:45:48	0	115.69.190.181	100	368	1	2017-01-09 03:45:50	R_DBqhhIfOOvNjEYh					-37.686096191406	176.16668701172	anonymous	4	2	It seems more fool proof and allows women a choice about whether to concieve or not		101				4							3	6	4	2	1	1	2	2	2	1	New Zealand	23	5	1	2	2	2
2017-01-09 03:40:57	2017-01-09 03:47:08	0	108.205.234.159	100	371	1	2017-01-09 03:47:10	R_PA3KGfVMqLlrlRf					39.860397338867	-93.675102233887	anonymous	4	3	Generally in favor of contraception.		116				3	Same as before.		119				3	3	2	3	2	1	4	4	4	1	US	49	6	3	2	2	2
2017-01-09 03:36:06	2017-01-09 03:51:13	0	49.207.59.217	100	906	1	2017-01-09 03:51:14	R_24qvkGN5ZjYV9dp					12.983306884766	77.583312988281	anonymous	4	5		(I wondered if 'equally effective' also meant 'equally acceptable to people'. I chose repellant because it may cause less distress for people who have religious or health concerns about contraception, or may feel pressured by their community regarding contraception.			101		6		I hadn't considered that women who are keen to have a baby could still have the baby on THEIR schedule, when they are ready, with the repellant.			101		4	4	2	2	2	2	4	2	2	2	New Zealand & USA	49	6	1	2	1	3
2017-01-09 02:56:19	2017-01-09 03:55:23	0	131.215.220.163	100	3543	1	2017-01-09 03:55:24	R_3Ib2lU2v7RfUi71					33.786605834961	-118.29869842529	anonymous	4	6		It allows women to choose pregnancy despite the virus			300		6		Same reason. There is no way to predict which babies are born at any given time so it doesn't matter that delaying changes who gets born.			300		4	3	3	2	1	1	4	3	3	1	American	23	5	1	2	2	3
2017-01-08 19:25:49	2017-01-09 03:59:09	0	80.182.200.155	100	30800	1	2017-01-09 03:59:10	R_1Cpi9DSKljhASK7					45.643295288086	13.790298461914	anonymous	4	7		it could affect everyone, not just the ones pregnant; i haven't read about unwanted pregnancies, so i suppose they're "all" wanted and that contraception is accessible to ones in need of it.				1	7		the "different baby" argument is just a philosophical mental masturbation, so the reasons i applied before keep on standing.				1	3	3	2	3	2	2	5	5	5	3	italian	35	2	2	2	2	2
2017-01-09 03:51:10	2017-01-09 04:10:02	0	103.194.63.245	100	1131	1	2017-01-09 04:10:04	R_5tgsLlA1sR9Q2XL					12.983306884766	77.583312988281	anonymous	4	2	The idea of preventing something before it happens appeals to me; rather than taking a chance with repellants even though the condition says it's equally effective.		200	1			2	I found the reasoning of different babies being born faulty. Even when a baby is normally conceived a sperm chooses a egg and hence, there is no determinism that the reasoning seems to imply.		207				3	4	4	2	2	2	4	3	3	2	Indian	25	6	3	2	2	3
2017-01-09 04:03:34	2017-01-09 04:10:44	0	122.106.221.67	100	430	1	2017-01-09 04:10:45	R_2tLs3MilGrXtKa5					-33.731994628906	151.30120849609	anonymous	4	5		Not confident that contraception would work			150		3	Assumption that it costs the same and is as effective		144				4	4	3	4	3	3	4	2	2	2	Australian	60	5	1	2	1	3
2017-01-09 04:12:05	2017-01-09 04:22:04	0	223.186.220.251	100	598	1	2017-01-09 04:22:06	R_31N0JdtIqEn2fLs					12.983306884766	77.583312988281	anonymous	4	7					626	1	3			1000	1			6	5	6	4	2	2	4	3	3	2	Indian	30	6	5	2	2	3
2017-01-09 04:12:43	2017-01-09 04:22:37	0	182.57.62.228	100	593	1	2017-01-09 04:22:39	R_3QVualDwT0yFWgg					18.975006103516	72.825805664062	anonymous	4	3	Added benefit of population control		201				3	added benefit of population control		202				5	5	4	4	3	3	4	4	4	1	Indian	55	4	2	2	1	2
2017-01-09 04:16:27	2017-01-09 04:23:44	0	75.183.160.79	100	436	1	2017-01-09 04:23:45	R_2R3oNM2bLkFDD6n					33.875	-78.658203125	anonymous	4	2	Because it's less damaging to the ecosystem, and it allows people to take responsibility for their own safety individually. Zina has been around for a very long time and is usually harmless. Why kill bees and other creatures needlessly?		1000	1			1	I already answered this. Mosquito repellent is dangerous.		1000	1			7	7	7	6	6	4	2	2	2	2	American	37	4	2	1	1	3
2017-01-09 04:21:24	2017-01-09 04:35:36	0	118.92.75.71	100	852	1	2017-01-09 04:35:37	R_RIbPc9ygAee8Bod					-45.879196166992	170.47198486328	anonymous	4	6		Because it still allows people to make their own family planning choices, and as I imagine many would be relevant to take contraception (as they want a baby, or for religious or social reasons), but more people would be likely to use the repellant			200	1	7		For the reasons stated before, but also because we don't know how long it'll be until it's safe to get pregnant - what if it's 10 years or more? That could have long-lasting social and economic effects.				1	5	6	5	3	2	1	2	2	2	2	New Zealander	29	6	3	2	1	2
2017-01-09 04:25:50	2017-01-09 04:40:08	0	50.44.252.41	100	857	1	2017-01-09 04:40:09	R_1oFqVJVKFvFPrCC					37.817993164062	-89.027801513672	anonymous	4	5		The repellent would work for women who are pregnant, and perhaps those who might conceive during the outbreak. Contraception puts the responsibility in the hands of the citizen; the repellent could effectively protect men, women, children, and the unborn. The government's responsibility is easier to justify if all citizens could be protected.			101		5		I would still prefer the repellent because only supplying contraception will make changes in the individual's lives. It would be like asking all women to avoid pregnancy and dictating when they can choose to become pregnant. I am pro-choice and would have trouble mandating contraception as the only government option. Also, if there is an outbreak, women can choose, on their own, to avoid pregnanc…			250		4	6	6	6	5	3	2	2	2	2	American	49	6	3	2	2	3
2017-01-09 04:37:36	2017-01-09 04:49:54	0	71.102.98.113	100	738	1	2017-01-09 04:49:56	R_2YWYsMNUotATUuy					40.939498901367	-75.969497680664	anonymous	4	2	I oppose procreation.		1000	1			1	This questionnaire assumes some semblance of personal identity is established at conception. It provides no supporting evidence that this is true.		110				4	4	3	6	5	2	4	3	1	2	nomadic	34	5	3	2	2	1
2017-01-09 04:40:46	2017-01-09 04:52:35	0	172.91.166.232	100	708	1	2017-01-09 04:52:36	R_cYpvQiP3lzoa5Ql					34.107299804688	-118.37190246582	anonymous	4	7		Because it doesn't require intelligent compliance			518	1	7		Because you aren't telling anything about compliance			887	1	2	2	2	1	1	1	5	5	5	1	Murrcan	75	6	1	2	1	2
2017-01-09 04:46:30	2017-01-09 05:12:55	0	73.92.22.123	100	1585	1	2017-01-09 05:12:57	R_2xxwfaa51bUYsa0					37.567001342773	-121.98289489746	anonymous	4	7					500		7						1	7	5	4	2	2	2	2	2	2	2	India	30	6	1	2	2	2
2017-01-09 04:59:08	2017-01-09 05:16:28	0	82.130.38.174	100	1040	1	2017-01-09 05:16:29	R_33BlALk5CNm6GoP					60.164093017578	24.713592529297	anonymous	4	3	It gives time (before new babies) to seek cure for zika		125				3	Im I in a loop? Same reason as before		125				3	3	4	1	1	3	4	4	4	1	Finland	24	5	3	2	2	2
2017-01-09 05:11:16	2017-01-09 05:18:50	0	123.51.50.12	100	454	1	2017-01-09 05:18:52	R_yxPANDvOxJardbb					-37.813903808594	144.96340942383	anonymous	4	2	Less harm to the environment		101				2	Less harm to the environment		101				4	5	5	4	4	2	4	4	4	1	Australian	54	6	3	1	1	2
2017-01-09 04:57:31	2017-01-09 05:20:13	0	189.164.218.4	100	1362	1	2017-01-09 05:20:14	R_3qDuFzQnAfP5I6E					19.050003051758	-98.199996948242	anonymous	4	6		Does not break birth balance in some countries			204		6		Does not change birth balance in some countries			198		5	3	5	3	3	3	1	1	1	2	Mexican	45	6	4	1	1	1
2017-01-09 05:04:18	2017-01-09 05:21:00	0	1.186.28.220	100	1002	1	2017-01-09 05:21:02	R_2ql8Pn23Ye64vmc					13.350006103516	74.783294677734	anonymous	4	5		There is no way to predict how long the outbreak will last			174		4							4	3	5	3	4	4	4	4	4	1	Indian	23	6	3	2	2	2
2017-01-09 05:21:29	2017-01-09 05:26:48	0	73.233.24.29	100	318	1	2017-01-09 05:26:50	R_4SYlVYBvKXFAxIl					39.975204467773	-75.312202453613	anonymous	4	1	Because it's always a woman's choice.		1000	1			1	Because it's always the woman's choice.		1000	1			7	7	7	3	2	1	3	3	3	2	USA	33	5	1	2	2	1
2017-01-09 04:57:19	2017-01-09 05:27:58	0	49.204.100.108	100	1839	1	2017-01-09 05:28:01	R_296BGEPaDoWA33E					28.666702270508	77.216705322266	anonymous	4	2	Contraception would have many benefits in addition to Zika and microcephaly prevention.		150				2	The same - funding free contraception would have many more benefits.		150				3	2	3	1	1	2	4	4	4	1	Indian	37	5	1	2	2	2
2017-01-09 05:14:50	2017-01-09 05:29:25	0	94.43.166.102	100	874	1	2017-01-09 05:29:26	R_2RQ6vt7VKxecmW7					41.725006103516	44.790802001953	anonymous	4	2			101				4							3	3	3	5	5	5	2	2	2	2	Georgia	28	6	1	2	2	2
2017-01-09 05:14:50	2017-01-09 05:31:45	0	122.167.141.230	100	1014	1	2017-01-09 05:31:46	R_dgaZXMmsyxl7kHv					12.983306884766	77.583312988281	anonymous	4	5		Addressing root cause of the problem is better than temporary measures that yet dont address the issue			803	1	6		Address the root cause				1	1	7	1	1	1	1	4	3	4	2	Indian	35	6	5	1	2	2
2017-01-09 05:22:11	2017-01-09 05:35:39	0	121.73.29.140	100	808	1	2017-01-09 05:35:40	R_3qxwgkWYKH8uq5i					-41.246597290039	174.79418945312	anonymous	4	5		Fewer side effects for women			174		5		Lower side effects			139		4	2	3	2	2	1	2	2	2	2	NZ	46	6	1	2	1	3
2017-01-09 05:44:36	2017-01-09 05:51:13	0	41.114.134.8	100	396	1	2017-01-09 05:51:15	R_2bOgsVbvZGda1RX					-33.925796508789	18.423202514648	anonymous	4	4							4							4	4	3	1	1	1	2	2	2	2	South African	47	6	4	2	1	2
2017-01-09 05:46:52	2017-01-09 05:54:47	0	94.5.1.26	100	475	1	2017-01-09 05:54:49	R_doFEC8Ubn7Xeaat					51.533294677734	-0.10000610351562	anonymous	4	5		So people who want to have children can do so during the outbreak			101		5		To give people the choice to have children when they want to, instead of recommending they delay pregnancy unnecessarily or			101		7	6	6	2	2	2	2	2	2	2	Australian	30	6	3	2	2	2
2017-01-09 05:40:25	2017-01-09 06:03:07	0	36.255.86.15	100	1361	1	2017-01-09 06:03:09	R_YRBf81txF981yvL					13.350006103516	74.75	anonymous	4	1	as I feel it reduces the chances of getting pregnent... the other one does not give the certainity		400	1			2	I think it would be to harsh to take chance with a baby's future... if mosquito replent fails then it would be diisastrous...		900	1			1	4	4	4	2	3	4	2	1	2	Indian	30	6	3	2	2	2
2017-01-09 06:01:03	2017-01-09 06:20:00	0	196.24.161.129	100	1137	1	2017-01-09 06:20:02	R_WByZEXoMhD2gqop					-33.916702270508	18.416702270508	anonymous	4	6		Less limitation on choice for same outcome.			151		6		Morally irrelevant who will be born. Also the repellant program will likely change who will be born, at least on long term (maybe the 100 workers doing the program have their life altered enough for it to effect who they conceive in the future, and that propagates out exponentially with the effect those lives have).			151		5	5	3	3	1	1	5	5	2	1	South African	20	4	1	2	2	2
2017-01-09 06:23:30	2017-01-09 06:31:24	0	118.209.16.15	100	474	1	2017-01-09 06:31:25	R_1Qn1e56sN9NWgLA					-37.760299682617	144.9501953125	anonymous	4	6		contraceptions seems slightly too eugenic...			500		6		same.			500		4	4	4	5	2	2	3	3	4	2	Australian	32	6	3	2	2	3
2017-01-09 06:20:08	2017-01-09 06:37:21	0	24.85.234.3	100	1033	1	2017-01-09 06:37:22	R_2CWyQXYL956XtYL					49.2666015625	-123.19760131836	anonymous	4	6		We cannot just stop reproduction. Mosquito repellent is a better option since it permits reproduction			1000		6		Same reason			1000		3	2	2	3	2	2	5	5	5	1	Iran	26	6	1	2	2	2
2017-01-09 06:33:10	2017-01-09 06:42:42	0	50.53.148.183	100	571	1	2017-01-09 06:42:43	R_2BkrJjMqd1q7NGO					45.355194091797	-122.86149597168	anonymous	4	1	Contraception is more likely to be used appropriately; repellent may not always be used or applied ineffectively. Of course, this may be the case with contraception, but contraception could include an IUD or a pill to be taken once a day, not repellent to be administered frequently.		101				2	Given the example, I don't see how the baby girl is any more valuable than the baby boy. Different times, different kids. It's the result of family planning regardless of Zika.		101				3	3	3	3	3	2	2	2	2	2	USA	36	6	2	2	1	3
2017-01-09 06:25:49	2017-01-09 06:43:23	0	68.144.120.164	100	1053	1	2017-01-09 06:43:24	R_3COEOkjUN0c8WLb					51.049392700195	-113.95639801025	anonymous	4	5		In relation to the situation it made the most sense to me. I'm a huge fan of contraception as it addresses a far wider range of issues which seems a better bang for the buck but for the specific context it negates the desires of everyone actually planing a family as well as assumes that the outbreak will pass quickly and all pregnancy can be avoided until it is deemed safe.			101		5		Seriously, changing which babies are going to be in the future is the issue with contraception? That we might alter the predetermined birth order of the next generation by allowing access to contraceptives? I would fund the mosquito repellent over contraception because the issue isn't the people having babies it's about the pregnant women getting infected with a virus that might cause a deadly he…			101	1	4	4	2	4	2	1	4	2	2	2	canadian	27	4	1	1	2	1
2017-01-09 06:37:14	2017-01-09 06:46:14	0	182.70.51.119	100	540	1	2017-01-09 06:46:16	R_2ydfDkrVehjlxZx					23.033294677734	72.61669921875	anonymous	4	2	because everybody gets mosquito repellant without thinking, many people don't go for contraception that easy		738	1			2	because children should be had when its safe to have children, the option to not have the child should be available to the mother and the father. zika virus or not.		767	1			7	7	6	2	1	3	4	5	4	2	Indian	28	6	1	2	2	3
2017-01-09 06:44:36	2017-01-09 07:05:47	0	88.113.33.7	100	1270	1	2017-01-09 07:05:48	R_2ruwlziXvzCTUbJ					63.078796386719	21.660598754883	anonymous	4	1	I believe in curbing any further population growth.			1			1	Why should I be concerned about a baby that does not even exist? It is ridiculous how we try to justify our right to existence without even considering how by doing so we have created a serious imbalance in our ecosystems resulting in such problems.			1			1	1	1	1	1	1	5	5	5	2	Indian	41	6	5	1	1	3
2017-01-09 07:03:33	2017-01-09 07:22:09	0	14.201.28.61	100	1115	1	2017-01-09 07:22:10	R_2QRto6jblm3wouF					-37.88639831543	145.00250244141	anonymous	4	1	It's easier to use contraception when you're sexually active than apply mosquito repellant daily and with full coverage. Also repellant just doesn't smell good.		1000	1			2	Even if repellent is more effective, I believe people are more likely to think to use contraception when needed, rather than remember to consistently apply repellent.			1			5	4	3	4	2	1	2	2	2	2	Australian	26	5	3	2	2	3
2017-01-09 07:05:00	2017-01-09 07:27:00	0	183.171.19.158	100	1320	1	2017-01-09 07:27:03	R_2ctEAIJv4nqap04					3.1728973388672	101.7333984375	anonymous	4	4							4							2	2	6	2	2	6	2	2	2	2	Malaysian	24	5	3	1	2	1
2017-01-09 07:23:57	2017-01-09 07:36:42	0	86.146.202.220	100	765	1	2017-01-09 07:36:43	R_xDCzQ7GZDENIdWx					57.479095458984	-4.2239990234375	anonymous	4	6		Not everyone will use contraception, many might have unprotected sex without thinking about a baby. People may be more inclined to use mosquito repellent if it means they'll be safer too.			101		6					101		4	7	5	1	3	2	2	2	2	2	Scottish	24	5	1	2	1	3
2017-01-09 07:23:20	2017-01-09 07:38:58	0	115.64.47.231	100	937	1	2017-01-09 07:39:00	R_3mltxtHExDitoxM					-33.902496337891	151.18579101562	anonymous	4	6		Contraception is a complicated issue that has bee around for much longer hence whether to implement contraceptive technics is a much larger issue to debate about than the immediate threat, which is mosquitos.it is possibly to develop a better contraception, but it would be harder to implement hence less effective.			659		6		Same reason given previously.				1	3	4	3	2	3	2	2	2	2	2	Chinese	30	6	1	2	2	2
2017-01-09 07:35:43	2017-01-09 07:54:34	0	97.93.58.29	100	1130	1	2017-01-09 07:54:36	R_3m3FcGkvfUAU2sH					34.169494628906	-118.12229919434	anonymous	4	3	It leaves the choice up to the mother and prevents accidental pregnancies.		101	1			3	For the same reasons as before, contraception gives the mother more authority over timing. Many women in Zika threatened areas do not have the same autonomy over their choices. What results from the timing of pregnancy is irrelevant - no one chooses nor knows what they will get when conceiving.			1			7	7	7	4	4	3	2	2	2	2	European Americans	33	6	3	1	2	3
2017-01-09 07:24:33	2017-01-09 07:55:14	0	97.113.119.221	100	1841	1	2017-01-09 07:55:15	R_1RLnWyQOcfMwFEh					47.685394287109	-122.28720092773	anonymous	4	2	contraception would also help advance family planning, which would save the state money in the long term and help mothers start families at times when they are most capable of caring for their children. these additional benefits are greater than those garnered from the mosquito repellent (provided our country doesn't have a high vulnerability to malaria)		300				2	even introducing the new premise to the equation, the baby Thomas would be born under better circumstances than the other baby, and extrapolated all Thomas' would be born in households more prepared to care for them than the alternative.		300				2	2	5	1	1	1	5	5	5	1	American	26	5	3	2	2	3
2017-01-09 07:45:29	2017-01-09 07:56:51	0	172.58.92.32	100	681	1	2017-01-09 07:56:52	R_1r3sGpBCl0ku93Q					37.61979675293	-122.38020324707	anonymous	4	1	I assumed contraception would be more effective, plus I think that we should discourage population growth.		101				1	Because I think human population growth should be humanely reduced anyway.		101				4	4	4	4	4	3	5	5	5	2	American	37	5	1	2	1	2
2017-01-09 07:54:17	2017-01-09 08:01:26	0	165.225.86.66	100	429	1	2017-01-09 08:01:27	R_2h4v3AYLpfY6gaR					45.492599487305	9.0778045654297	anonymous	4	7		Contraception (i.e., rendering sexual acts infertile) is intrinsically harmful to the human body, so it is never a valid means to accomplish something, even for the sake of a good end.				1	7		For the same reason as before: contraception is intrinsically harmful, so it must never be deliberately used.				1	3	3	3	2	2	2	1	1	1	1	USA	38	6	5	1	2	1
2017-01-09 06:52:02	2017-01-09 08:09:34	0	209.150.40.72	100	4651	1	2017-01-09 08:09:35	R_3h4rHOqHpqZtFBQ					40.748199462891	-73.906799316406	anonymous	4	5		Because for those women who want to have babies, mosquito repellant will help them safely do so.			101		5		Again, because it still allows women who want to get pregnant the option			101		3	3	3	1	3	1	5	4	3	1	American	28	5	5	2	2	3
2017-01-09 08:00:22	2017-01-09 08:12:26	0	99.237.28.150	100	724	1	2017-01-09 08:12:28	R_1GTf3lRvkDhg16z					43.714401245117	-79.590896606445	anonymous	4	5		Afraid to unintentionally influence demographic trends for the worse			101		4							2	3	2	2	2	1	2	2	2	2	Canadian	18	2	2	1	2	2
2017-01-09 06:45:55	2017-01-09 08:38:59	0	101.100.143.107	100	6783	1	2017-01-09 08:39:00	R_1HbdGM6Zg7gEOOd					-36.86669921875	174.76669311523	anonymous	4	7		The use of mosquito repellent enables choice for women who want to have children at this time.			200		7		Same reason as earlier. It better preserves choice for women.			200		5	5	6	2	1	1	2	2	2	2	British	41	5	1	2	1	2
2017-01-09 08:31:03	2017-01-09 08:42:24	0	144.139.10.3	100	681	1	2017-01-09 08:42:25	R_PUmgkM6wCwkOW53					-27.918304443359	153.33270263672	anonymous	4	3	Mosquito repellent probably contains more harmful chemicals than contraception		150				5		a pregnancy might not happen at a later point			150		1	2	1	2	1	2	5	4	5	2	Australian	51	6	5	2	1	1
2017-01-09 08:30:54	2017-01-09 08:45:25	0	73.216.242.214	100	871	1	2017-01-09 08:45:26	R_2wzXf1r1ml1L6H7					38.434799194336	-77.986602783203	anonymous	4	1	Pesticides harm more than mosquitoes.		101				1	Because mosquito repellent has other consequences to the environment that all humans and animals share.		101				3	2	3	1	2	2	2	2	2	2	USA	53	5	1	2	1	2
2017-01-09 08:46:54	2017-01-09 08:55:29	0	50.152.60.236	100	514	1	2017-01-09 08:55:30	R_1H5d1fEw06iqxZq					39.647796630859	-104.98780059814	anonymous	4	3	Fewer environmental externalities for contraception, depending on method.		368				3			392				7	4	4	2	2	2	2	2	2	1	USA	31	6	3	2	2	1
2017-01-09 08:51:37	2017-01-09 09:03:02	0	124.188.113.116	100	684	1	2017-01-09 09:03:04	R_3388SsxqSobxwkq					-37.88330078125	145.04998779297	anonymous	4	6		Because the problem is the mosquito, not the woman. They shouldn't have to delay pregnancy if there is an equally effective alternative to having a healthy baby.			101		6		Same reasoning as previously. If an equally safe alternative exists, women shouldn't have to delay pregnancy unless they wish to.			101		7	7	7	1	2	2	2	2	2	2	Australian	41	6	1	1	1	3
2017-01-09 08:56:54	2017-01-09 09:05:37	0	137.222.44.153	100	522	1	2017-01-09 09:05:38	R_1mlTXNpO0d19cPO					51.449996948242	-2.5832977294922	anonymous	4	4							4							4	3	5	2	2	2	2	2	2	1	British	24	6	2	1	2	1
2017-01-09 08:58:42	2017-01-09 09:08:47	0	81.129.16.60	100	605	1	2017-01-09 09:08:48	R_3EQ2fhd1BzGJyeK					51.449996948242	-0.19999694824219	anonymous	4	1	The world is significantly over-populated, independent of Zika virus. Also, there may be unintended teratogenic consequences of escalating mosquito repellent use.		1000	1			1	It is of no interest which babies are born.		1000	1			1	1	1	7	1	1	5	5	5	2	British	48	6	5	1	1	2
2017-01-09 08:55:43	2017-01-09 09:14:02	0	68.13.24.133	100	1099	1	2017-01-09 09:14:04	R_ZBIyQfX6Gl4NQkh					41.306900024414	-96.106399536133	anonymous	4	6		Does not interfere in women's choice of pregnancy			101		6		Does not interfere in the woman;s choice to become prenant			101		2	3	2	2	3	1	4	4	4	1	Indian	70	6	1	1	1	3
2017-01-09 09:01:23	2017-01-09 09:17:08	0	87.214.249.29	100	945	1	2017-01-09 09:17:09	R_BzTy0TFXNrs2tMJ					51.689498901367	5.3034973144531	anonymous	4	6		It affects all and not only pregnant women. Most importantly, contraception use might be influenced by power imbalances between couples (men not wanting to use contraception), while the use of a mosquito repellent is more gender-neutral and will be, possibly, more widely applied.			101		5		Same reasons as before. While delaying childbirth may have negative demographic consequences, it might also spare women from pregnancy related diseases or child mortality, if childbirth happened at a very young age. Still if contraception saves 101:100 I would prefer conrraception.			101		7	6	6	4	3	3	3	2	2	1	Italian	26	6	2	2	2	3
2017-01-09 09:16:21	2017-01-09 09:29:04	0	70.197.9.169	100	763	1	2017-01-09 09:29:05	R_1ePjAJcJ6xWWIfb					34.054397583008	-118.2440032959	anonymous	4	4							4							2	3	1	1	2	1	4	4	4	2	American	21	5	4	1	2	2
2017-01-09 09:20:52	2017-01-09 09:32:03	0	110.140.93.154	100	671	1	2017-01-09 09:32:05	R_UXbVK8Q0oRXsyiZ					-37.933303833008	145.23330688477	anonymous	4	2	Because over-population is a serious issue in many of the countries affected by zika. Contraception would have multiple benefits in helping these women reduce the number of children they bear overall, in addition to reducing birth deformities.		110				1	The argument about which baby might be born is a furphy. Tanya is one of thousands of possible outcomes from that particular episode of sex. As long as she is just a hypothetical life, 'she' has no more value than Thomas.		111				6	3	3	1	1	1	4	4	4	2	Australian	50	6	1	1	2	2
2017-01-09 09:33:46	2017-01-09 09:41:53	0	74.128.137.84	100	486	1	2017-01-09 09:41:54	R_2ux56AILPuYcIKn					38.976501464844	-84.479797363281	anonymous	4	7		Using mostquito repellent does nothing to affect the choices made by a group of people.			101		7		Mosquito repellent does not affect one group of people's choices.			101		7	7	3	3	4	1	3	3	3	1	American	29	5	4	1	2	2
2017-01-09 09:38:43	2017-01-09 09:45:39	0	164.39.177.238	100	416	1	2017-01-09 09:45:41	R_2PpQ7Tcn1LY9lQZ					51.566696166992	-0.016693115234375	anonymous	4	7		Contraception alters the demographic of the country, this is a bad side effect. Mosquito repellent is neutral in this respect. Really this question is misleading, since we are not told how effective each course of action would be. some forms of contraception are morally wrong, since they prevent a human child from implanting on the womb. barrier methods do not have this moral grievance. And we ar…				1	7		as I said, imposing contraception on a whole country has a very bad side effect of changing its demographic. also on a personal level it may be morally suspect (depending on the method).				1	7	7	7	4	4	4	1	1	1	1	UK	35-40	6	1	1	1	1
2017-01-09 09:39:00	2017-01-09 09:47:52	0	118.209.118.79	100	531	1	2017-01-09 09:47:53	R_24HN1CwRkIxrcOu					-37.810302734375	144.95440673828	anonymous	4	7		Because contraception would delay women wishing to have a child from conceiving			300		7		to avoid delays in women conceiving			300		7	6	3	1	2	2	2	2	2	2	Australian	36	6	1	2	2	3
2017-01-09 09:44:34	2017-01-09 10:01:10	0	213.80.114.230	100	996	1	2017-01-09 10:01:11	R_1jrpFKqK1WTLp5N					59.332595825195	18.064895629883	anonymous	4	1	There are to many humans on this planet		149				1	The planet is overpopulated		701	1			1	1	1	1	1	1	5	5	5	1	Swedish	56	6	2	2	1	2
2017-01-09 09:54:28	2017-01-09 10:01:17	0	219.88.183.75	100	409	1	2017-01-09 10:01:19	R_2R50hC3zyvqnTAv					-41.288101196289	173.33569335938	anonymous	4	4							4							1	1	2	2	1	1	2	2	2	2	New Zealander	47	6	3	2	2	1
2017-01-09 09:56:56	2017-01-09 10:06:04	0	82.41.124.170	100	548	1	2017-01-09 10:06:06	R_2UbBAmtqM5dpKly					55.949996948242	-3.1999969482422	anonymous	4	7		So that people are free to choose when to become pregnant			101		7		The same reason as before: so that people have freedom to choose what to do with their lives			101		2	2	1	1	1	1	5	5	4	1	British	20	4	1	2	2	2
2017-01-09 10:04:39	2017-01-09 10:12:08	0	120.147.14.32	100	449	1	2017-01-09 10:12:10	R_300N2Gva61Mhsf2					-37.889099121094	145.17401123047	anonymous	4	6		Women could be pregnant already without knowing, in which case contraception would not be as effective.			500		6		As above.			501		2	2	2	4	3	3	4	4	2	1	Australian	23	6	1	2	2	3
2017-01-09 10:14:04	2017-01-09 10:18:34	0	70.251.184.176	100	269	1	2017-01-09 10:18:35	R_5164BcAyoLbxVM5					30.267807006836	-97.742599487305	anonymous	4	4							4							3	3	3	1	1	1	2	2	2	2	USA	47	6	3	2	1	2
2017-01-09 10:13:12	2017-01-09 10:31:31	0	24.130.122.173	100	1099	1	2017-01-09 10:31:33	R_3qvyAHK0b4EBWk0					37.878402709961	-122.26029968262	anonymous	4	6		Because, under contraception, women who *want* to become pregnant cannot do so without risking a bad outcome. Repellent allows everyone to pursue their goals without any barriers. (I initially leaned towards contraception because it seemed more effective and had positive unintended consequences, but the disclaimer about equal efficacy changed that.)			200		6		Same as before. (It was the same question, just with new 'expert' info, right?) It shouldn't matter *who* gets born. But it *does* matter that parents can plan their families and that the society, as a whole, doesn't have to deal with the shock of a baby 'depression'/'boom'.			200		2	2	3	1	2	2	2	2	2	1	USA	26	6	5	2	2	2
2017-01-09 10:28:33	2017-01-09 10:42:50	0	178.55.248.110	100	857	1	2017-01-09 10:42:51	R_33vTJyvTnB3H1cl					60.175598144531	24.934204101562	anonymous	4	4							3	Because in the long run, contraception entails more elements than just controlling the virus, for instance, the increasing of population and other matters, and probably will create less waste than the production of thousands of repellent.		600				4	3	4	2	3	2	3	2	3	1	Colombian	37	6	5	2	2	3
2017-01-09 10:36:25	2017-01-09 10:44:17	0	24.68.13.26	100	472	1	2017-01-09 10:44:18	R_2w17ZCCbK55sEkw					48.449600219727	-123.41929626465	anonymous	4	4							4							4	3	3	3	4	2	2	2	2	2	Canadian	30	5	2	2	2	3
2017-01-09 10:37:07	2017-01-09 10:44:22	0	107.202.129.131	100	434	1	2017-01-09 10:44:23	R_2YAhCi1H41YEeI3					33.940994262695	-83.434097290039	anonymous	4	6					101		6					101		1	2	3	1	1	1	2	2	2	2	White	48	6	3	2	1	1
2017-01-09 10:26:43	2017-01-09 10:47:57	0	147.122.28.136	100	1273	1	2017-01-09 10:47:58	R_3JhdWBjhZkISsTA					45.694305419922	13.73779296875	anonymous	4	2	Contraception is also important beyond this particular project.		110				2	Contraception is also important beyond this specific issue. My answers are not modified by the identity question.		110				4	4	2	3	2	2	4	4	4	1	french	34	6	2	2	2	2
2017-01-09 09:41:54	2017-01-09 11:02:40	0	197.218.90.13	100	4845	1	2017-01-09 11:02:41	R_1OjIJm1SjkEa4Na					-18.25	35	anonymous	4	6		Respect people's right to choose to procreate or not. Also, the repellant might prevent other mosquito borne diseases. Further, link between zika and microcephaly is tenuous.			113		6		Respect people's right to choose to procreate			121		4	3	6	4	3	4	4	4	4	1	South African	56	5	3	2	1	1
2017-01-09 10:54:48	2017-01-09 11:07:49	0	179.218.18.177	100	780	1	2017-01-09 11:07:50	R_1P8fhI9fOzLcjDM					-22.88639831543	-43.203704833984	anonymous	4	1	Because each pregnancy avoided has 100% chance of avoiding a new microcephaly case.		101				1	Because worldwide natality rates must come down for the species to survive.		101				1	1	4	1	1	1	5	5	1	1	Brazilian	54	6	1	2	2	2
2017-01-09 11:17:57	2017-01-09 11:28:19	0	67.175.49.220	100	621	1	2017-01-09 11:28:20	R_3L4JhLfQQQVjU00					42.169494628906	-87.958801269531	anonymous	4	2	Zika can be transmitted to a woman through her partner, and even if the country provided enough mosquito repellent for all residents, they could still be infected if they travel abroad or have sex with someone who had.		101				2	Same reason as before. Genetics is such a lottery that the main difference between scenario 2 and 3 is the age of the mother, given that genetically even fraternal twins could be as similar and as different as Tonya and Thomas, assuming the same father. This could have considerable implications for the child's future, of course, given potential different socioeconomic standing and job status and …		101				6	3	3	1	1	6	4	2	2	2	American	31	5	3	2	2	2
2017-01-09 10:56:41	2017-01-09 11:33:54	0	213.160.63.190	100	2233	1	2017-01-09 11:33:56	R_2AMC86i6J3xVEjn					47.317794799805	8.5818939208984	anonymous	4	5		Preserves greater individual autonomy regarding reproduction			110		6		Preserves individual choice			110		1	1	2	5	6	3	5	2	1	2	Swiss	47	6	1	2	1	1
2017-01-09 11:09:26	2017-01-09 11:38:37	0	178.197.224.52	100	1750	1	2017-01-09 11:38:38	R_2THvqeUcSTgGvCK					47.144897460938	8.1551055908203	anonymous	4	7		fewer variables - a tangible solution regardless of the mothers' progress and may avoid further complexities surrounding womens' autonomy their bodies/ living + sociocultural situation/ attitude towards pregnancy			102		4							1	1	1	1	1	1	3	3	3	2	Australian	25	5	3	1	2	2
2017-01-09 11:31:21	2017-01-09 11:43:50	0	79.129.106.193	100	749	1	2017-01-09 11:43:52	R_1pETo01FRuR21GW					37.983306884766	23.733306884766	anonymous	4	6		Mosquitos are a problem anyway. Convincing people to use contraception is not effective.			102		6		Delaying, in effect, the birth of a generation (who knows how long the Zika virus is active?) is too big an unknown			192		4	3	5	1	2	2	4	4	4	1	Greek	59	4	2	2	1	2
2017-01-09 11:32:45	2017-01-09 11:44:43	0	193.84.57.196	100	717	1	2017-01-09 11:44:44	R_30hOEouMX0qq3aT					50.083297729492	14.466705322266	anonymous	4	7		It limits the impact on people's freedom to have babies. Too many women would have their choices extremely limited with the contraception method, especially older women with fewer chances to conceive. It also provides a long-term solution, as opposed to the contraception method.			1000	1	7		The example above goes to show that while Contraception and Mosquito repellent may avoid as many microcephaly cases, Contraception causes some additional inconveniencies on top of that.			1000	1	1	1	1	1	1	1	4	4	4	2	Czech	23	4	4	2	2	2
2017-01-08 16:01:34	2017-01-09 12:05:24	0	140.112.238.59	100	72229	1	2017-01-09 12:05:25	R_22VsWv38btlTMYC					25.041793823242	121.49661254883	anonymous	4	7		Because individual human can use readily available way such as condom for birth control, while mosquito control cannot be carry out by individual.			1000	1	7		Because with mosquito repellent, there will be no Zika which is the root of the problem,.			1000	1	5	5	7	7	3	3	4	4	4	1	Malaysian	21	4	1	2	2	2
2017-01-09 11:56:39	2017-01-09 12:15:18	0	82.77.50.94	100	1119	1	2017-01-09 12:15:19	R_26mvLXr5VZJOgCw					47.066696166992	21.933303833008	anonymous	4	6		Because the decision to take Contraception medicine is in the hands of the individual, and since most religions prohibit it, it would probably be more wise and efficient to use the mosquito repellent.			150	1	2	Because I'm assuming a Mosquito repellent would be somewhat toxic for everyone involved.		380	1			2	6	6	1	2	3	4	4	4	2	romanian	32	4	1	2	2	2
2017-01-09 12:00:33	2017-01-09 12:15:47	0	97.99.70.67	100	914	1	2017-01-09 12:15:49	R_1Qn3YeqBYa47nWz					33.001693725586	-96.844100952148	anonymous	4	1	We cannot anticiapte the long-term effects of the 'repellent' nor can we be certain that repellent will be effective. Thus, giving choice to women to determine and control their own risk appears most appealing.		1000				1	As a researcher, I would most consider the design and data of the research to help me choose. That said, I conitnue to believe that womens choice should remain primary so that they can continue to control their choice (many that extend beyond Zika).		1000				7	4	3	4	4	4	4	4	4	1	USA	42	6	3	1	1	2
2017-01-09 12:11:23	2017-01-09 12:20:40	0	68.175.140.76	100	556	1	2017-01-09 12:20:41	R_eIMma8ihktaUuBz					42.407196044922	-76.515899658203	anonymous	4	2	Chemical mosquito repellant that is in constant use might cause other problems, whereas contraception is a known and safe medical treatment.		101				2	We do not know the harmful efffects of the mosquito repellant, how many people it will be administered to, and the potential health effects accompanied by a chemical mosquito repellent, not only on mother and fetus, but on the population at large.		101				5	5	2	6	2	2	4	3	4	2	American	37	6	1	2	2	2
2017-01-09 12:04:45	2017-01-09 12:21:25	0	195.113.155.3	100	999	1	2017-01-09 12:21:26	R_1CwIpw4OJH0W3SM					49.199996948242	16.63330078125	anonymous	4	1	Contraception protects women from more than just one disease.		101				1	Because contraception protects from more than one disease.		101				1	1	1	1	1	1	5	5	5	1	Czech	21	2	2	2	2	2
2017-01-09 12:20:06	2017-01-09 12:25:46	0	213.233.132.134	100	339	1	2017-01-09 12:25:47	R_3futlktbPtBqS4l					53.347198486328	-6.243896484375	anonymous	4	6		If you give it to everyone, you should cover 100% pop. Less likely with contraception			101		6		As before			101		4	6	7	2	2	1	1	1	1	2	Irish	31	6	1	1	2	3
2017-01-09 12:18:59	2017-01-09 12:26:21	0	74.128.119.64	100	442	1	2017-01-09 12:26:23	R_1lortMXBqCHwNyS					38.015899658203	-84.484703063965	anonymous	4	4							4							5	7	7	5	5	3	4	3	3	2	USA	56	6	5	1	1	3
2017-01-09 11:56:51	2017-01-09 12:27:10	0	123.201.192.83	100	1819	1	2017-01-09 12:27:12	R_2xJCKzeqUVwxRXf					18.533294677734	73.86669921875	anonymous	4	5		Contraception seems like a forced move, on the other hand Mosquito repellent tackles the problem at its core.			101		6		Why wait for the problem to go away and in the mean while delay everything when there is another solution which works just as effectively and also immediately			101		4	5	6	5	3	3	4	3	3	1	Indian	20	4	1	2	2	2
2017-01-09 12:00:09	2017-01-09 12:27:44	0	84.40.91.203	100	1654	1	2017-01-09 12:27:46	R_3G8kNqUYrwXy6Xh					42.683303833008	23.316696166992	anonymous	4	2	I think contraception is better for the eco system.		653				2	For the same reason.		664				7	7	7	4	3	7	2	2	2	2	Bulgarian	43	6	5	2	1	2
2017-01-09 12:27:15	2017-01-09 12:39:42	0	107.77.202.184	100	746	1	2017-01-09 12:39:43	R_3Dq1K7Ies92JdPO					38.905700683594	-76.978302001953	anonymous	4	6		If equally effective better to disrupt mosquitoes than people			101		6		Same as before			101		4	3	2	1	4	1	2	2	2	1	USA	58	6	2	2	1	1
2017-01-09 12:33:16	2017-01-09 12:45:40	0	162.156.45.189	100	744	1	2017-01-09 12:45:42	R_9TORL2ZbLRD9zoJ					55.330001831055	-123.08999633789	anonymous	4	6		To consider the needs of pregnant women who conceived before the intervention was introduced and the needs of those women who wish to have babies. Contraception only seems more limiting in this consideration.			101		6		More choice to the women.			101		5	6	7	2	1	2	2	2	2	2	Canadian	37	6	1	2	2	2
2017-01-09 12:45:35	2017-01-09 12:53:43	0	200.198.136.69	100	487	1	2017-01-09 12:53:44	R_3Mu5T2xcvFhwCcM					-30.033294677734	-51.199996948242	anonymous	4	2	Contraception seems easier to use		101				4							4	3	3	3	3	1	3	3	3	1	Brazilian	42	6	2	2	2	1
2017-01-09 12:51:13	2017-01-09 12:59:57	0	41.13.120.94	100	523	1	2017-01-09 12:59:58	R_1gcDr8QVEJRCkUk					-25.706893920898	28.229400634766	anonymous	4	1	The mosquito repellant might have an effect on the bio system, causing other problems		1000	1			1	Because mosquito repellant might affect the environment detrimentally		1000	1			3	2	2	1	2	2	5	4	5	2	South African	53	5	1	1	1	1
2017-01-09 13:05:58	2017-01-09 13:16:01	0	196.212.184.99	100	602	1	2017-01-09 13:16:02	R_2Cx0QRH46S0ipaK					-26.230895996094	28.058303833008	anonymous	4	5		So people could still have children			119		5					121		3	3	4	3	3	3	4	4	4	2	South African	46	6	3	2	1	3
2017-01-09 12:51:25	2017-01-09 13:40:14	0	123.201.34.64	100	2928	1	2017-01-09 13:40:15	R_2tJt3ONB4toEojR					18.533294677734	73.86669921875	anonymous	4	6		many people might not be comfortable with using contraceptives. and contraceptives would need supplementary basic education programs such as 'how to use properly'/ 'what are the effects of...'			200		7		many people might be uncomfortable with the idea of using contraceptives. also, with contraceptives, there would be a need to provide supplementary basic sex.ed. such as "how to properly use'/ 'what are the effects of..'. Thirdly, the distribution of conception will remain spread out over the whole year instead of being congested towards the end of the epidemic			200		2	2	2	6	2	2	4	3	3	1	Indian	23	5	2	2	2	2
2017-01-09 13:35:23	2017-01-09 13:55:31	0	205.178.101.212	100	1208	1	2017-01-09 13:55:33	R_1f8j6LXD2EotVxf					41.937301635742	-87.655097961426	anonymous	4	3	Contraception can be misleading. If we mean 'the pill,' it is around 92-95% effective in real world conditions. I don't know effectiveness of mosquito repellent, but it most likely doesn't come close to that effectiveness level. If by contraception we mean condoms or other methods, that might be lower and switch my answer. Hence my answer of somewhat - it's a vague question.		101				4							3	3	4	3	2	4	2	2	2	1	American	36	5	2	2	2	3
2017-01-09 13:26:41	2017-01-09 14:05:52	0	128.141.192.225	100	2350	1	2017-01-09 14:05:54	R_2Qll92reP2qpCcs					46.231903076172	6.0711975097656	anonymous	4	7		contraception is not a solution to Zika, it's solution to pregnancy.			305		7		contraception should not be used to avoid mosquito bites				1	5	3	2	4	2	2	2	2	2	2	Chinese	27	6	1	2	2	2
2017-01-09 12:55:20	2017-01-09 14:05:53	0	109.236.86.38	100	4233	1	2017-01-09 14:05:55	R_2X04H4mACM1Gqoh					52.382400512695	4.8995056152344	anonymous	4	2	Because prevention is better than curing. When we are able to prevent a problem and its physical and psychological side effects, why we should let the problem happen, in the first place?		1000	1			2	Because prevention is better than curing. When we are able to prevent a problem and its physical and psychological side effects, why we should let the problem happens, in the first place? Besides, I don't believe that our world will be an awful place to live without Tania/s (If I remember her name correctly). We need to be more logical and not choosing one method over the other based on "emotions…		1000	1			1	1	1	2	3	3	5	5	5	2	Iranian	31	6	3	2	2	2
2017-01-09 13:56:58	2017-01-09 14:06:29	0	178.197.233.39	100	570	1	2017-01-09 14:06:31	R_3rYzqufZ7mNZvOM					47.144897460938	8.1551055908203	anonymous	4	3	Free contraception also allows family planning independently of the zika outbreak		150				5		I made a mistake I really favour contraception. I'm answering the next question based on that.			151		1	7	7	1	7	1	2	2	2	2	Swiss	45	6	2	1	1	2
2017-01-09 13:53:28	2017-01-09 14:09:37	0	169.149.37.238	100	968	1	2017-01-09 14:09:39	R_yVYZ2LRwhP4pScV					32.733306884766	74.86669921875	anonymous	4	7		Both the methodes were equally effective and the costs were same, so it is better to reproduce when you hv equal chance of contracting or not contracting microcephaly			1000		7		Given that both the methodes are equally effective and the costs involved are equal, it is better to reproduce			1000	1	4	5	3	2	2	2	4	4	4	1	Indian	44 years	6	3	2	1	1
2017-01-09 13:51:39	2017-01-09 14:23:10	0	86.103.174.140	100	1891	1	2017-01-09 14:23:11	R_cY0IdRrbtJbOQyV					54.334701538086	10.134796142578	anonymous	4	2	Because it has the added benefit of allowing more 'family planning' control, perhaps giving women more say over their bodily rights, and might also go some way towards reducing population numbers which currently exceed that which the planet can sustain.		950				3			678				5	5	5	2	2	3	2	1	2	2	Scottish	22	5	1	2	2	1
2017-01-09 14:30:44	2017-01-09 14:39:07	0	40.142.148.222	100	502	1	2017-01-09 14:39:09	R_1rdokje95YiCHtz					35.366500854492	-80.521499633789	anonymous	4	1	Think that would be more effective, but must be balanced with more efforts to eradicate disease		101				2	Limiting number of children born is a good thing		101				1	1	1	1	1	1	5	4	3	2	USA	69	6	1	2	2	3
2017-01-09 15:16:54	2017-01-09 15:24:09	0	95.34.110.253	100	434	1	2017-01-09 15:24:10	R_1onbrJXJJKI1Ktb					59.955596923828	10.480499267578	anonymous	4	4							4							4	4	4	1	4	4	4	4	4	1	U.s.a.	34	5	3	1	1	2
2017-01-09 15:27:30	2017-01-09 15:34:32	0	137.108.145.25	100	422	1	2017-01-09 15:34:34	R_1CkdsLW2yjqB8Z3					52.033294677734	-0.69999694824219	anonymous	4	1	I feel that, with contraception, fertility is easier to control that mosquitoes may be. It gives people the choice.		101				4							3	5	5	3	2	3	2	2	2	2	British	31	6	1	2	2	2
2017-01-09 15:21:47	2017-01-09 15:42:40	0	131.94.186.20	100	1252	1	2017-01-09 15:42:41	R_1pznFyPZggiuo2C					25.558395385742	-80.458198547363	anonymous	4	5		I thought it would be more likely to be accepted by the population since it is less invasive to the personas autonomy.			101		5		If people can have the kids they want now without passing on microcephaly to them, then I prefer the repelant			101		3	1	1	1	1	1	5	5	5	1	American	23	5	4	1	2	2
2017-01-09 15:46:38	2017-01-09 15:57:29	0	73.74.159.184	100	650	1	2017-01-09 15:57:30	R_2WIpurxzo6hR2YY					42.030197143555	-87.687797546387	anonymous	4	7		It does not interfere with human freedom and human lives.			371		7		It does not interfere with human freedom and human lives.			379		2	2	3	5	5	2	2	2	2	1	US	69	6	3	2	1	3
2017-01-09 15:53:25	2017-01-09 16:08:47	0	78.145.18.36	100	922	1	2017-01-09 16:08:49	R_3mjWrEryN6etgKF					51.545700073242	-0.14030456542969	anonymous	4	5		We don't know how long it will take to eradicate the virus. I find it difficult to put women and men willing to have kids in a situation where they have to put their reproductive desire on hold for an unpredicated period of time.			200		5		For the same reason than before			200		6	5	5	2	2	3	2	2	2	2	French	38	6	2	2	2	2
2017-01-09 06:33:17	2017-01-09 16:12:25	0	84.16.105.115	100	34747	1	2017-01-09 16:12:27	R_214e3WfdEGZk3uI					50.033294677734	16.199996948242	anonymous	4	6		less impact on people			1000		6		less impact on people			1000		3	3	3	2	2	2	4	4	4	1	czech	38	6	2	2	1	2
2017-01-09 12:33:08	2017-01-09 16:19:36	0	82.132.225.124	100	13587	1	2017-01-09 16:19:38	R_1isy6sRwF35TwMz					51.496398925781	-0.12240600585938	anonymous	4	6		Contraception should be available anyway, in my opinion. It would seem unwanted that society would not see any babies born for n unclear period of time. Hence I feel preventing microcepahly through mosquito repellent would be better.			200		6		Same answer as before			201		4	3	4	2	4	4	4	2	2	2	dutch	42	6	5	1	1	2
2017-01-09 15:47:03	2017-01-09 16:28:18	0	144.32.241.128	100	2475	1	2017-01-09 16:28:21	R_2CmlvIQixZ285h9					53.958602905273	-1.0827941894531	anonymous	4	6		Maybe some people still want to have babies. Contraception won't help them!			150		6		same reason as before, some people might not want to wait to have a child			150		3	7	7	2	2	2	2	2	2	1	Australian	43	5	4	2	1	1
2017-01-09 15:30:42	2017-01-09 16:29:13	0	137.151.203.74	100	3510	1	2017-01-09 16:29:14	R_diiHRtVP4KZaJup					33.876800537109	-117.89309692383	anonymous	4	3	The only way to be absolutely sure one's child will not develop microcephaly is to avoid creating a child altogether until the threat has passed. Also, mosquito repellent requires reapplication throughout the day, thus it presents a higher margin of error than the pill (once a day), ring (once a month), or IUD (once for 4-5 years).		110				3	As a parent, one hopes and prays for a healthy child. Whether it is Tonya or Thomas, the child will be loved. And one can argue that a healthy child will live a more pleasurable and easier life than a sick child.		110				2	2	4	1	2	2	3	2	2	1	United States of America	32	6	1	2	2	3
2017-01-09 16:20:56	2017-01-09 16:34:19	0	85.72.109.130	100	802	1	2017-01-09 16:34:22	R_ZCuRBmoPz8xi9Pj					37.983306884766	23.733306884766	anonymous	4	2	Contraception can prevent more than just the spread of the Zika virus and it's widespread use would more significantly improve the health of the population.		150				2	Same reason as before. Babies are not existent before an egg is fertilized therefore the delay of childbirth due to contraception is insignificant.		561				2	2	2	2	2	2	4	2	2	1	United States	20	2	4	1	2	3
2017-01-09 16:34:43	2017-01-09 16:50:11	0	186.144.36.134	100	927	1	2017-01-09 16:50:12	R_2VIyGUiQiFpUASV					4.5980987548828	-74.075798034668	anonymous	4	2	I believe over population is a problem, and by postponing some births in the present, you may encourage fewer total births in the future.		101	1			2	Delaying births in the present may, in fact, reduce the total number of births in the future.		101				6	6	6	2	2	6	4	4	4	1	USA	40	6	2	2	2	2
2017-01-09 16:36:26	2017-01-09 16:52:40	0	192.84.212.79	100	973	1	2017-01-09 16:52:41	R_pAklIPTAga4E2at					51.566696166992	-0.016693115234375	anonymous	4	7		more likely that people would use repellent over contraception. becomes more of a political minefield when you advise sexual practices			101		7		i think you have a strange conception of life esp re. different babies ... either way mosquito repellent would be prefferred becuase in addition to previous response, contraception makes sex worse !			101		4	4	4	2	2	2	2	2	2	1	British	27	6	1	2	2	3
2017-01-09 16:47:18	2017-01-09 16:59:26	0	36.255.86.15	100	727	1	2017-01-09 16:59:28	R_vdmbgrMns93KkN3					13.350006103516	74.75	anonymous	4	7					101	1	7		To avoid control and domination on women			104	1	5	5	7	1	1	1	4	4	4	1	Indian	25	6	5	1	2	3
2017-01-09 17:03:20	2017-01-09 17:09:06	0	177.79.39.10	100	346	1	2017-01-09 17:09:07	R_2OO6FrnzIKPv15S					-23.473297119141	-46.665802001953	anonymous	4	7		Contraception should not be a strongly pushed government program			514	1	7		Government should not strongly push contraception as a solution to health problems				1	3	3	5	2	2	2	4	4	4	1	American	44	5	4	1	1	3
2017-01-09 17:18:33	2017-01-09 17:36:12	0	107.147.212.56	100	1058	1	2017-01-09 17:36:13	R_31XTKvWWaEUxIsx					42.498001098633	-83.407203674316	anonymous	4	6		Women cannot be forced to use contraception even if it's in their best interest, and mosquito repellent would reduce the transmission rate for everyone. There may be lasting effects of Zika for non-pregnant people so reducing the transmission rate for everyone is better.			202		6		Zika infection may have lasting effects on non-pregnant people too. Reducing all cases is better than only caring about the effects on developing fetuses.			201		5	3	6	2	2	2	4	4	4	2	American	55	4	2	2	1	3
2017-01-09 17:52:56	2017-01-09 18:11:22	0	70.212.131.204	100	1105	1	2017-01-09 18:11:23	R_1hQk4rc4cCHAOIM					21.306900024414	-157.85830688477	anonymous	4	6		I perceive a higher probability of preventing the spread of the virus after pregnancy rather than trying to control pregnancy. People already have some control over conception and less control over mosquitos is the environment.			101		3	If both methods are of equal safety, then the unknown variable of mosquito repellant in the environment over time is avoided all together.		101				4	4	3	4	5	3	5	5	2	2	American	37	5	3	1	1	2
2017-01-09 17:32:35	2017-01-09 18:21:39	0	138.251.224.126	100	2944	1	2017-01-09 18:21:40	R_6AmUE432hCtVoHP					56.333297729492	-2.7832946777344	anonymous	4	3	I think the compliance rate would be higher with contraception than with the mosquito repellent, even if theoretically they are both as effective. In the case of the latter, I think people would feel entitled to judge by themselves whether it is really needed or not, based on their own perceptions of risk, and choose not to use it if they think there aren't many mosquitoes around, if the wind is …		200				2	same reasons as given to previous question. I couldn't care less about which babies will exist in the future, there is no reason to cry over children that were never even conceived, and much less to base policy on such regrets. Contraception has the added bonus of giving women control over their reproductive choices, and it would have a higher rate of compliance in my opinion, as it allows for le…		200				4	5	6	1	1	1	4	3	2	2	Romanian	30	6	4	1	2	2
2017-01-09 18:14:15	2017-01-09 18:39:11	0	157.50.145.83	100	1496	1	2017-01-09 18:39:14	R_WdgHv7C1woW7JQt					11.350006103516	77.733306884766	anonymous	4	7		Contraception limits right of a woman to conceive, same is not the case with Mosquito repellent				1	7		Same old reason, woman have right to get pregnant				1	4	5	2	6	2	2	4	3	4	1	Indian	35	5	3	2	1	1
2017-01-08 18:16:32	2017-01-09 18:40:00	0	118.92.217.84	100	87808	1	2017-01-09 18:40:01	R_3oX6lgDxyT6V6Tc					-41.19709777832	174.91979980469	anonymous	4	6		Mosquito appeared more immediate and many couples, evening understanding the risk could choose to not use contraception for 'pleasure'/ other purposes. Additionally, for those wanting a child, they may risk doing so regardless of the consequences.			101		4							3	3	3	4	7	3	5	3	2	2	NZ	19	2	3	2	2	2
2017-01-09 18:35:03	2017-01-09 18:46:56	0	75.70.6.88	100	712	1	2017-01-09 18:46:57	R_1hNhu2dtq4FdM1l					38.876495361328	-104.82879638672	anonymous	4	2	The many other benefits that contraception confers in addition to zika virus prevention.			1			2	The many other benefits conferred by contraception in addition to zika virus prevention.			1			3	3	3	1	2	1	4	4	4	1	USA	50	6	3	2	1	2
2017-01-09 18:49:52	2017-01-09 19:03:21	0	67.209.249.254	100	809	1	2017-01-09 19:03:23	R_3EcBXva7IKyV666					43.848907470703	-84.734901428223	anonymous	4	6		seems more long term solution			101		6		same reason			101		5	6	6	3	3	3	2	2	2	1	American	61	6	1	2	1	2
2017-01-09 18:52:24	2017-01-09 19:15:45	0	107.167.106.161	100	1400	1	2017-01-09 19:15:46	R_ywM6rycqoMRnoGJ					35	105	anonymous	4	7		1000				1	7		1000				1	1	3	1	1	1	1	4	4	4	1	Indian	31	6	5	2	2	2
2017-01-09 19:39:17	2017-01-09 19:59:20	0	93.87.184.85	100	1202	1	2017-01-09 19:59:21	R_3nUv9GSaJ2vA4LC					44.818603515625	20.46809387207	anonymous	4	5		I do not have ethical problems with contraceptio. It seems to me that Mosquito repellent is a better choice.			150		4							7	7	7	4	7	7	5	4	4	1	Serbian	50	6	3	1	1	1
2017-01-09 19:47:56	2017-01-09 20:00:30	0	67.4.197.163	100	753	1	2017-01-09 20:00:31	R_1EaN94YhivsMbiJ					45.080001831055	-93.137802124023	anonymous	4	5		Mosquito repellent protects all women, including the women for whom contraception fails or who don't use it well.			101		4							4	2	2	1	1	1	2	2	2	2	United States	66	6	1	2	1	1
2017-01-09 19:14:17	2017-01-09 20:09:28	0	99.181.54.18	100	3311	1	2017-01-09 20:09:29	R_bdbzvF9wBmi8izL					32.865005493164	-96.791397094727	anonymous	4	4							2				1			3	3	3	4	3	3	4	4	4	2	Indian	28	5	1	2	2	2
2017-01-09 20:14:42	2017-01-09 20:23:12	0	67.168.130.41	100	510	1	2017-01-09 20:23:14	R_1Bned8mDfJC9FNn					47.638107299805	-122.37149810791	anonymous	4	3	Tendency to think that reduction in conception would be healthier for all in the present day. So there would be dual benefit from this remedy.		101				3	for the same reason as before		101				3	3	3	2	1	1	4	4	4	2	usa	32	5	1	2	2	1
2017-01-09 20:15:33	2017-01-09 20:25:00	0	130.91.39.4	100	566	1	2017-01-09 20:25:01	R_3oQNgusxi23rfJK					39.959701538086	-75.196800231934	anonymous	4	3	avoids killing life		101				3	avoids killing		101				3	4	2	2	2	2	2	2	2	1	USA	40	5	2	2	1	2
2017-01-09 20:20:24	2017-01-09 20:33:09	0	151.227.204.173	100	765	1	2017-01-09 20:33:10	R_qOpMuaaQwaWqzxT					51.473602294922	-0.091598510742188	anonymous	4	5		Because they are equally effective and the mosquito repellent would not delay women from conceiving; there would likely be many women who did not want to put this off until street an outbreak had passed.			300		6		Same reason as for last time this question was posed. I'm more interested in immediate pressures on the women (how distressing it might be to have to wait an unknown length of time for the virus to pass/worries about declining fertility) than whether the baby born is a Thomas or a Tanya.			351		6	6	6	1	1	1	2	2	2	2	British	28	5	4	1	1	2
2017-01-09 20:31:57	2017-01-09 20:42:16	0	83.223.232.91	100	619	1	2017-01-09 20:42:17	R_9ZkgH6Dpl06J7Hj					38.713897705078	-9.139404296875	anonymous	4	2	Contraception has also other health care and social benefits.		363				2	Contraception has other health care and social benefits.		365				6	6	3	2	1	1	2	2	2	2	Portuguese	31	6	2	2	2	2
2017-01-09 20:51:41	2017-01-09 21:02:22	0	146.87.136.64	100	640	1	2017-01-09 21:02:23	R_3HSJND7Z6GtAPvd					53.483306884766	-2.2666931152344	anonymous	4	6		Because women retain the ability to plan their family			110		6		The argument changes nothing. Hypothetical humans have no moral weight.			110		2	2	3	2	2	2	4	4	3	1	British	35	5	1	2	1	2
2017-01-09 20:54:24	2017-01-09 21:05:58	0	174.31.211.184	100	693	1	2017-01-09 21:05:59	R_9RWC8JcSxG1xmc9					47.307800292969	-122.31770324707	anonymous	4	1	Possible environmental effects		452				1	POssible environmental consequences		461				6	6	1	2	4	1	2	2	2	2	US	47	4	1	2	1	3
2017-01-09 21:01:04	2017-01-09 21:29:34	0	192.222.145.144	100	1709	1	2017-01-09 21:29:35	R_3KBpasSb3S3QRcV					45.506301879883	-73.629699707031	anonymous	4	2	Because there are now other alternatives to avoid mosquito's health risks with the introduction of genomic infertile specimens in a population such as the Aedes aegypti		1000				2	Because even though the scenarios stipulate they have equal risks, I believe that if there are unforeseeable consequences that science discover later on, it is better that they affect humans rather than an other species.			1			7	4	7	4	4	2	4	4	4	1	Canadian	24	5	3	2	2	3
2017-01-09 19:45:55	2017-01-09 21:29:38	0	86.150.239.166	100	6223	1	2017-01-09 21:29:40	R_bpvtyHcxVgkpZxD					51.63330078125	-0.76669311523438	anonymous	4	6		Less social side effects e.g. Contraception has a whiff of eugenics in this situation			398		6		I still find contraception in such a use case to be a tough sell. I just can't see a population taking to it happily. Especially in today's post truth world of rabble rousing populists.			402		3	7	1	5	2	1	5	4	4	1	British	48	6	3	2	2	2
2017-01-09 21:09:38	2017-01-09 21:29:42	0	137.159.139.216	100	1203	1	2017-01-09 21:29:43	R_RW7DD6Z0zuXPzrz					34.025802612305	-118.78039550781	anonymous	4	6		Prefer to have more healthy humans than have less. Also keeps the agency families have over their child-bearing plans.			250		6		Same reasons, doesn't really matter that the children that "would have been born" are different. What child is born is altered by such trivial factors as time of intercourse in the day and previous diet of the partners. I don't take such factors to be morally relevant, and neither is contraception in my view.			248		2	7	7	1	7	1	4	4	4	1	U.S.A	21	4	4	1	2	3
2017-01-09 21:27:10	2017-01-09 21:33:21	0	207.87.244.222	100	370	1	2017-01-09 21:33:23	R_BE41kxPifuBD0dj					39.114807128906	-77.246200561523	anonymous	4	4							4							6	7	7	6	4	2	2	2	2	1	usa	59	6	3	1	1	2
2017-01-09 10:58:05	2017-01-09 21:38:28	0	109.42.2.29	100	38423	1	2017-01-09 21:38:30	R_Qh6dhfymGeYoW6R					48.885101318359	8.7306976318359	anonymous	4	6		I want to leave the babies the decision when they want to be born			765		7		same as above, also do we have a right to sort out our children?			784		5	5	3	1	1	2	2	2	2	2	german	32	5	2	1	2	3
2017-01-09 21:36:09	2017-01-09 21:48:32	0	178.197.234.108	100	743	1	2017-01-09 21:48:34	R_1rf4Pv9UcVafWD6					47.144897460938	8.1551055908203	anonymous	4	2			101				6					101		3	2	3	2	2	4	2	2	2	2	Swiss	22	5	2	2	2	2
2017-01-09 21:52:08	2017-01-09 21:58:04	0	24.36.51.246	100	356	1	2017-01-09 21:58:06	R_qyBqD8aUbmbZjOx					43.251403808594	-79.892501831055	anonymous	4	1	More likely to have the desired impact and empowers wonen.		543				1	Because it gives women control.		532				4	4	4	2	2	2	2	2	2	2	Canadian	45	5	1	2	1	2
2017-01-09 21:44:21	2017-01-09 22:00:33	0	75.66.128.30	100	972	1	2017-01-09 22:00:34	R_3OkplCYmRSZfp3M					35.113296508789	-89.902099609375	anonymous	4	1	I have some concerns about the environment impact of insecticides.		150				3	I have concerns about environmental impact of certain pesticides.		150				2	1	2	1	1	1	4	4	4	1	USA	48	4	1	2	2	3
2017-01-09 21:40:34	2017-01-09 22:01:04	0	176.249.131.233	100	1230	1	2017-01-09 22:01:06	R_1dvoACGP0FyFYwt					51.566696166992	-0.33329772949219	anonymous	4	6		Women could choose to avoid falling pregnant by abstaining. Repellent would help those already pregnant.			101		5		Helps babies already conceived and those that will be conceived			101		2	6	4	2	2	2	4	4	2	2	British	35	5	2	2	1	2
2017-01-09 22:02:33	2017-01-09 22:07:22	0	96.245.80.16	100	289	1	2017-01-09 22:07:24	R_ZrGacSgj5FCgXst					40.002395629883	-75.300796508789	anonymous	4	7		protecting people from disease seems infinitely preferable to ensuring fewer people around to protect			1000	1	7					1000	1	7	7	7	1	2	2	2	1	1	2	USA	25	5	3	1	2	1
2017-01-09 22:02:46	2017-01-09 22:08:38	0	64.125.175.43	100	352	1	2017-01-09 22:08:40	R_2P6uZ2gF0lt0fZG					42.360504150391	-71.054801940918	anonymous	4	7		Moral objections				1	7		Moral objections				1	5	7	7	2	2	2	2	2	2	1	American	33	6	3	1	1	1
2017-01-09 21:54:13	2017-01-09 22:08:58	0	67.245.101.139	100	885	1	2017-01-09 22:09:00	R_3PMpCiCpIQdttuz					40.760498046875	-73.993301391602	anonymous	4	2	because it seemed more effective at saving lives.		101				4							4	4	4	1	1	1	3	3	3	3	Canada	30	6	5	1	2	2
2017-01-09 22:01:42	2017-01-09 22:09:37	0	203.24.7.9	100	474	1	2017-01-09 22:09:40	R_3KutWdBPRXzZWIf					-33.880996704102	151.07989501953	anonymous	4	5		Although I am progressive in views on contraception, I believe that health services should promote reactive as well as proactive and population growth must continue as it is important for the economy. Now I say it out loud it sounds silly and maybe its just lapsed catholic guilt.			101		6		Because the Contraception is negating the existence of a peson who should hav been born and feels like its messing with the timeline or messing with the future			202		6	4	3	3	6	3	2	1	1	2	Australian	40	6	1	2	1	3
2017-01-09 22:03:48	2017-01-09 22:10:54	0	142.151.164.160	100	426	1	2017-01-09 22:10:56	R_1FF0muOebBjzQit					43.662902832031	-79.398696899414	anonymous	4	6		I'd imagine that people would be more likely to use it.			201		7		Because I'd rather not change the future -if that makes sense- when the costs are the same.			302		1	1	1	1	1	1	4	3	2	1	Canada	19	2	1	2	2	3
2017-01-09 22:02:09	2017-01-09 22:12:41	0	96.42.18.204	100	632	1	2017-01-09 22:12:42	R_1eXbLgikziVOMsK					42.558395385742	-89.159896850586	anonymous	4	6		Because if they are equally effective, we shouldn't interfere in women's choices about their bodies. If we can allow them to engage in the right timing for themselves, then we should.			201		6		Same answer as before: it allows women to plan their lives around the right timing for their own pregnancies.			202		5	4	3	2	2	2	2	2	2	2	USA	41	6	5	2	1	2
2017-01-09 22:03:46	2017-01-09 22:13:19	0	37.228.231.204	100	572	1	2017-01-09 22:13:20	R_2ylvPx3NvrV5CoQ					53.338897705078	-6.2595062255859	anonymous	4	6		If they're equally effective, it's just common sense to prevent people from getting the disease at all.			101		4							7	7	4	1	1	1	2	2	2	1	Irish	22	5	4	2	2	1
2017-01-09 22:08:41	2017-01-09 22:13:42	0	186.213.213.60	100	301	1	2017-01-09 22:13:44	R_2aOBogKaJAaGlYO					-15.783294677734	-47.916702270508	anonymous	4	1			333				1			333				1	1	1	1	1	1	3	3	3	1	Brazil	36	6	2	2	2	1
2017-01-09 13:38:06	2017-01-09 22:14:06	0	65.92.205.232	100	30960	1	2017-01-09 22:14:07	R_ALq8EfPOoEuf9rX					44.295501708984	-76.428001403809	anonymous	4	1	in general, I prefer solutions that reduce the number of people coming into existence. And I strongly support reproductive autonomy.		200				4							1	1	3	1	1	1	4	3	3	2	Canadian	67	6	5	1	1	2
2017-01-09 22:05:44	2017-01-09 22:14:26	0	130.126.149.141	100	521	1	2017-01-09 22:14:27	R_23egcKoBbwxYxc0					40.110595703125	-88.207298278809	anonymous	4	6		Women should always have access to contraception. But for the specific goal of preventing babies from being born with Zika-related microcephaly, mosquito repellent would be better because every woman, whether she is pregnant or not, would have some protection.			101		5		A number of factors go into whether it's a good time for a woman to have a child, and women who want to bear children while there's a Zika outbreak should be able to do so safely if possible.			101		5	4	3	2	2	2	1	1	1	2	USA	44	6	1	2	1	2
2017-01-09 22:05:33	2017-01-09 22:15:06	0	213.47.49.28	100	572	1	2017-01-09 22:15:07	R_3EjQNJwGMMoXHwZ					47.115707397461	15.590103149414	anonymous	4	4							5		Not sure			1000		7	3	4	1	1	1	4	4	4	1	Portuguese	41	6	2	2	2	1
2017-01-09 22:04:41	2017-01-09 22:16:13	0	207.67.119.130	100	691	1	2017-01-09 22:16:14	R_2B9D0FRFjJhTPN0					41.903793334961	-87.67569732666	anonymous	4	2	Access to contraception is a public good independent of Zika prevention		112				2	Women choosing when to have children gives them power		112				3	3	3	1	1	1	2	2	2	1	USA	26	5	4	2	2	2
2017-01-09 22:05:12	2017-01-09 22:16:57	0	50.200.247.82	100	705	1	2017-01-09 22:16:59	R_RxDsqKVRnZcM6dP					42.3583984375	-71.059799194336	anonymous	4	5		I think Mosquito repellent gives citizens the freedom to choose when to get pregnant (with minimal risk), whereas Contraception requires citizens to wait until some unknown future date, and takes away the ability to chose their own timeline.			105		5		The same reasons as before, the idea that different babies will be born via contraception makes no difference in my mind.			105		5	2	2	1	1	1	2	2	2	1	USA	30	5	2	2	2	2
2017-01-09 22:05:27	2017-01-09 22:18:18	0	73.44.10.131	100	770	1	2017-01-09 22:18:19	R_2V9fU08Zt12WCz3					41.96369934082	-87.884101867676	anonymous	4	7		Contraception is considered a grave evil in Catholicism, one of the world's largest religions and most popular in many Zika infected areas, and thus a far more controversial and culturally imperialistic solution compared to mosquito repellent.				1	7		Same as last answer. Contraception is a grave moral evil in the Catholic Church, whose members are found in many Zika-prone areas. Contraception is also contributing to a worldwide crisis by reducing the human population across the globe. The implied moral calculus of the way this scenario is set up is not actually relevant to correct moral decision-making.				1	7	7	7	2	2	2	1	1	1	1	USA	27	5	3	2	1	1
2017-01-09 22:12:11	2017-01-09 22:18:19	0	70.197.8.173	100	367	1	2017-01-09 22:18:20	R_1CBW511K0T15MYg					37.338806152344	-121.89140319824	anonymous	4	4							4							7	7	4	3	5	2	2	2	2	1	American	22	5	3	2	2	1
2017-01-09 22:11:12	2017-01-09 22:18:46	0	172.58.225.201	100	454	1	2017-01-09 22:18:48	R_abBIDes6jIunS0h					40.669494628906	-73.872596740723	anonymous	4	1	increases access to contraception		305				2	increases access to contraception		306				6	4	3	2	1	1	4	3	3	2	usa	33	6	2	2	2	2
2017-01-09 22:01:31	2017-01-09 22:20:17	0	130.89.232.77	100	1125	1	2017-01-09 22:20:18	R_1LSBMATdEAsWrhn					52.220092773438	6.9013061523438	anonymous	4	5		Because you want to make sure that people still can reproduce, however there are also environmental risks to mosquito repellent.			101		4							2	3	2	1	2	2	4	3	2	1	Dutch	25	5	5	2	2	1
2017-01-09 22:09:44	2017-01-09 22:20:20	0	220.239.202.166	100	636	1	2017-01-09 22:20:22	R_Ck9mfjrN7uLTUfn					-37.833297729492	145	anonymous	4	7		People should be free to reproduce at will			1000	1	7		People should be able to reproduce at will.			1000	1	7	6	6	1	1	1	4	4	4	1	United States	36	6	5	1	1	2
2017-01-09 22:06:51	2017-01-09 22:21:14	0	168.215.171.66	100	862	1	2017-01-09 22:21:15	R_bQrKcQHJRZvwcp3					29.927093505859	-90.097297668457	anonymous	4	1	Because I don't want there to be any chance, or at least the smallest possible chance, that a child is created with that sort of painful deformity.		101				1	Same answer as before, contraception means there is almost no chance a baby is born with that deformity. I get your premise that they are equally effective, but I reject it.		101				7	7	4	7	7	3	2	1	1	1	American	35	6	3	2	1	3
2017-01-09 22:13:37	2017-01-09 22:22:11	0	45.19.138.50	100	513	1	2017-01-09 22:22:12	R_3jeOXsOErKwwYBe					38.672897338867	-121.14880371094	anonymous	4	6		Contraception is ineffective for couples who wish to have a child. While there are added benefits to funding contraception, I do not feel as though they are worth the added burden imposed by this loss of freedom. There are also added benefits to mosquito repellent, including combating other MBIs like malaria or yellow fever.			557	1	6		Same as previous.				1	7	7	5	1	1	1	4	3	3	1	American	31	4	3	2	1	3
2017-01-09 22:15:05	2017-01-09 22:22:59	0	96.20.68.168	100	473	1	2017-01-09 22:23:00	R_1g7xUkJNmxp5mXj					45.486099243164	-73.573196411133	anonymous	4	7		Assume women chose to become/continue pregnancy. Should provide care based on this			1000		7		Same answer as before			1000		4	4	3	1	1	2	4	2	2	2	Canadian	43	6	3	2	2	2
2017-01-09 22:17:24	2017-01-09 22:24:06	0	208.4.14.9	100	402	1	2017-01-09 22:24:08	R_3rG0za8BXM3wqeA					41.873199462891	-88.000198364258	anonymous	4	1	people will actually use the contraception.		1000	1			1	why the fuck are you asking the exact same questions over and over?			1			3	4	5	4	4	4	4	4	4	1	USA	39	4	3	2	2	2
2017-01-09 22:15:32	2017-01-09 22:24:30	0	174.199.19.66	100	538	1	2017-01-09 22:24:32	R_1f8wm432jncEqxd					41.614303588867	-72.149101257324	anonymous	4	7		Bringing children into the world is an unquestionable good, and we should not discourage women from doing so.				1	7		Babies are beautiful sources of joy. We should not force women to risk their children's health just for wanting them to exist.				1	7	7	7	6	6	6	1	1	1	1	American	24	5	3	1	1	1
2017-01-09 22:10:20	2017-01-09 22:25:04	0	139.80.74.76	100	883	1	2017-01-09 22:25:05	R_1IZvSCHSanWx4af					-45.871398925781	170.51190185547	anonymous	4	5		The stated chance of microencephaly was 10% so funding contraception seemed less advantageous than funding mosquito repellant that would help more people to avoid becoming sick at all. I also think telling women when to have children or not is not acceptable. They should weigh the risk themselves (this is of course not implied by free contraceptives, but is sort of implied)			517	1	7		Mosquito repellant avoids many people getting zika whereas contraception only stops women having babies, some of which might have microencephaly many of which will not. I don't think women's reproductive choices should be forced.				1	6	6	6	3	2	2	2	2	2	2	New Zealander	35	6	4	1	2	2
2017-01-09 22:15:28	2017-01-09 22:25:54	0	172.56.3.189	100	626	1	2017-01-09 22:25:56	R_uypQWfcttkVFRNn					39.335403442383	-76.788803100586	anonymous	4	4							4							4	4	2	2	2	2	3	3	3	2	US	36	6	3	2	2	3
2017-01-09 22:10:54	2017-01-09 22:26:48	0	24.196.131.60	100	954	1	2017-01-09 22:26:50	R_zdPAmZR3NfQVPtD					43.037200927734	-89.38639831543	anonymous	4	7		Contraception seems like a weird way to deal with what is a mosquito problem. I believe that women should have access to contraception *in general*, but that is unrelated to any considerations of Zika.				1	7		Being able to time ones pregnancy is very important. This is the very reason why women have a right to contraception. This goes both ways, though, if the woman wants to have her baby now, we should make sure she is able to do so.				1	3	6	3	1	1	1	2	2	2	1	USA	32	5	2	2	1	3
2017-01-09 22:05:50	2017-01-09 22:28:18	0	97.90.213.49	100	1347	1	2017-01-09 22:28:19	R_3NUiL9nk9ZmbWyg					35.738693237305	-82.054801940918	anonymous	4	3	Mosquito repellant seems more prone to becoming more ineffective or inefficient over time whereas contraception seems to be more of a stable method. Tough decision however.		101				6		Since the two now seem to be equally effective methods and the difference becomes when the baby is born (and who the baby is), I opted for the repellent.				1	6	5	3	4	4	3	4	3	3	1	American	23	5	1	2	2	1
2017-01-09 22:23:32	2017-01-09 22:29:54	0	32.211.126.37	100	382	1	2017-01-09 22:29:56	R_2X1cMQDbUddNtg5					41.6123046875	-73.412101745605	anonymous	4	1	If that's what it takes to get women free contraception, then great.		400	1			1	The Tanya/Thomas dichotomy is useless, in my opinion. A mother is still mother, no matter when she makes that choice. Might as well offer her the choice of when!!		1000	1			4	5	6	2	1	1	2	2	2	2	White	22	5	2	2	2	1
2017-01-09 22:19:56	2017-01-09 22:30:39	0	107.77.200.129	100	642	1	2017-01-09 22:30:40	R_3KDYn6ftRwKlzKr					32.778701782227	-96.821701049805	anonymous	4	5					110		5					110		6	6	5	5	3	3	2	2	2	1	USA	35	4	1	1	2	1
2017-01-09 22:16:47	2017-01-09 22:31:33	0	184.152.79.217	100	885	1	2017-01-09 22:31:34	R_2zjbeV5YYvrPChn					40.694396972656	-73.990600585938	anonymous	4	6		Repellent attacks the problem closer to the source.			150	1	6		Repellent attacks the problem vloser to the source.			150		4	4	3	4	4	3	4	4	4	1	American (United States of America)	30	5	3	2	2	3
2017-01-09 22:25:30	2017-01-09 22:32:05	0	173.168.5.19	100	394	1	2017-01-09 22:32:06	R_VXuN6y8fjzAh9iV					27.942993164062	-82.524002075195	anonymous	4	5		Because some women will become pregnant no matter what and they need protection			202	1	5						1	6	6	6	1	2	1	2	2	1	2	USA	30	6	1	2	2	2
2017-01-09 22:24:06	2017-01-09 22:32:27	0	12.69.175.194	100	500	1	2017-01-09 22:32:28	R_28CLNIhfXqbt8IH					41.955993652344	-87.660697937012	anonymous	4	6		Mosquito repellent benefits all, not only the pregnant; moreover, I believe women should be able to choose the timing of their pregnancies without government influence.			101		6		The same reason as before: women should be free to choose the timing of their own pregnancies without government influence.			101		6	6	6	2	2	2	2	2	1	2	US	29	6	3	2	2	2
2017-01-09 22:11:16	2017-01-09 22:33:38	0	107.77.214.113	100	1342	1	2017-01-09 22:33:39	R_3NFcdbWlfklqUOZ					37.907302856445	-122.28199768066	anonymous	4	7		So the woman/family have the choice to have a child now, or the time of their choosing without delay.			999	1	7		Choice			1000	1	4	7	1	2	2	2	3	3	3	2	Mexican American	37	4	1	2	1	1
2017-01-09 22:31:12	2017-01-09 22:37:03	0	188.29.164.185	100	350	1	2017-01-09 22:37:04	R_SZ42pEFsJzz36Gl					51.559692382812	0.07080078125	anonymous	4	6		To protect all even women already pregnant			140		6		To address pregnant cuss hat have not been detected yet			123		3	3	1	1	7	1	3	3	1	2	Australian	45	6	3	2	2	3
2017-01-09 22:19:48	2017-01-09 22:42:16	0	165.225.34.101	100	1347	1	2017-01-09 22:42:17	R_1BOXU7HvT0gkt75					32.787704467773	-96.800003051758	anonymous	4	1	mosquito repellent isn't a pill to keep women from getting pregnant.		200				2	Still think women's access to birth control is very important.		110				3	3	3	2	2	2	5	4	4	2	White	33	6	3	2	2	3
2017-01-09 22:34:00	2017-01-09 22:42:53	0	172.58.46.133	100	532	1	2017-01-09 22:42:54	R_10AXhQkvrRWPu3z					47.606201171875	-122.33209991455	anonymous	4	6		Simpler, more direct, fewer ethical obstacles.				1	6		Same reasons				1	6	5	5	2	2	2	1	1	1	1	American	33	5	3	2	1	1
2017-01-09 22:34:54	2017-01-09 22:44:32	0	128.237.188.127	100	577	1	2017-01-09 22:44:33	R_30iTYW5FD52GoCy					40.443893432617	-79.956100463867	anonymous	4	1	Because I am biased. Even though you said they work the same, I know mosquito repellent would work less well.		125				1	Becuase in the long term, delaying birth until it is safe is better than using chemicals. DDT is a good example of the risk of using chemicals to repel mosquitos.		127				1	3	1	1	7	1	5	5	5	2	White	26	6	1	2	2	2
2017-01-09 21:58:17	2017-01-09 22:44:54	0	186.223.23.231	100	2797	1	2017-01-09 22:44:55	R_bsydmgEBYKa43tP					-22.561706542969	-47.402801513672	anonymous	4	5		Because contraception is great, but it wouldn't deal with the problem of already pregnant women.			101		5					101		4	4	4	3	4	4	2	2	2	2	Brazilian	33	6	5	1	2	2
2017-01-09 22:40:10	2017-01-09 22:45:12	0	76.115.21.191	100	302	1	2017-01-09 22:45:13	R_1CBXpYzZ4AAtI2T					45.450897216797	-122.69619750977	anonymous	4	2	I believe that preventing the disease (via pregnancy) is better than treating it (greater odds of success)		101				2	Same as before, fewer infected babies		592	1			1	1	1	1	1	1	5	5	5	2	USA/American	40	6	3	1	2	2
2017-01-09 22:35:30	2017-01-09 22:47:46	0	203.152.123.246	100	736	1	2017-01-09 22:47:48	R_1r3pTvCABuHY2ti					-37.791397094727	175.29440307617	anonymous	4	7		Anyone who is already pregnant at the time of the outbreak can get protection,but the contraception will only help women not already pregnant. In addition it allows people the freedom to reproduce as they wish.			1000	1	7		Same reason as previous answer - allows people the freedom to reproduce as they wish. Some older women may not want to delay pregnancy. Also allows protection of those already pregnant.				1	3	3	2	2	2	3	3	2	2	2	New Zealand European	30	5	3	2	1	3
2017-01-09 22:43:24	2017-01-09 22:51:04	0	69.204.82.110	100	459	1	2017-01-09 22:51:05	R_2S3lcpE3eSI7kwR					42.939407348633	-78.843803405762	anonymous	4	3	Providing birth control has additional benefits for women apart from preventing the effects of zika.		300				3	Same as previous answer		300				4	3	3	2	2	2	2	2	2	1	US	31	5	3	2	2	2
2017-01-09 22:40:03	2017-01-09 22:51:58	0	216.174.134.2	100	714	1	2017-01-09 22:51:59	R_3QYTj6QjE1rbAY3					50.425094604492	-104.53890228271	anonymous	4	7		every society needs babies to ensure they can carry on. not sure how long we would be preventing babies from being born under the other model.			101		7		likely more babies born over the live of this woman			101		4	4	4	3	3	2	4	3	3	2	canadian	30	6	3	2	2	3
2017-01-09 22:32:29	2017-01-09 22:52:48	0	129.59.122.21	100	1218	1	2017-01-09 22:52:49	R_Zwc85pOqd3imeZ3					36.14729309082	-86.777000427246	anonymous	4	6		This both allows people the liberty of copulating and reproducing at their discretion			101	1	5		People should have the liberty to have children when they so choose			101	1	6	2	3	4	2	3	2	2	2	1	American	19	4	4	2	2	3
2017-01-09 22:46:56	2017-01-09 22:53:41	0	24.198.137.246	100	405	1	2017-01-09 22:53:42	R_2zpR1t8H7X3yANY					43.973205566406	-71.232597351074	anonymous	4	7		Because it solves the problem with fewer negative consequences and allows women to time pregnancy as desired rather than delaying because of fear			145	1	7		It allows women to time their pregnancies as they desire for personal reasons				1	4	4	2	1	2	2	2	2	2	2	American	31	5	3	2	1	1
2017-01-09 22:44:57	2017-01-09 22:57:51	0	99.59.187.120	100	773	1	2017-01-09 22:57:52	R_1dhqar4BM5jSriM					42.188995361328	-87.806297302246	anonymous	4	7		Less invasive to people			214		7		Same reason as before - less invasive to people - I agree 100% with the rationale of Tanya vs. Thomas			224		4	3	6	3	3	3	4	4	2	1	Russian	29	6	2	2	1	2
2017-01-09 22:52:14	2017-01-09 22:58:26	0	139.218.167.111	100	371	1	2017-01-09 22:58:28	R_31yJB41ryTUuYLQ					-33.861206054688	151.19821166992	anonymous	4	7		Less intrusive on people's reproductive choices			819		7		As before, I think it's less intrusive on people's reproductive choices (and more likely to be used)			904		6	6	4	3	2	2	4	3	3	1	New Zealand	28	6	3	2	2	2
2017-01-09 22:36:23	2017-01-09 22:59:55	0	130.43.77.171	100	1412	1	2017-01-09 22:59:56	R_r0vUz1EWUTu9u8N					37.983306884766	23.733306884766	anonymous	4	2	feel there is greater chance of people actually using contraception over mosquito repellent		101				2	actual versus potential - a theoretical possibility of a 'different' child should have no bearing on decision. in all cases a new person is born. otherise may start wondering into what potentially adult person the unborn child will develop		101				4	5	6	4	2	2	4	4	4	1	Greek	38	5	1	2	1	2
2017-01-09 22:42:24	2017-01-09 23:02:31	0	118.211.73.231	100	1206	1	2017-01-09 23:02:33	R_2rwjoDa4QZTWFoS					-34.988494873047	138.53979492188	anonymous	4	4							4							4	3	3	3	2	2	5	4	3	2	australian	36	5	1	2	1	2
2017-01-09 22:51:31	2017-01-09 23:03:24	0	24.56.229.150	100	712	1	2017-01-09 23:03:25	R_31ilAdvIo17Iprm					47.583892822266	-122.29949951172	anonymous	4	1	the chemicals in pest repellent could have negative effects on human health, ecology, and mosquitos may quickly become immune		151				1	which baby exists in tbe future is still random		152				4	3	1	1	1	1	2	2	2	2	united states	32	5	1	2	2	3
2017-01-09 22:56:22	2017-01-09 23:04:40	0	50.92.141.199	100	497	1	2017-01-09 23:04:41	R_10NUAtkPxnEvhcD					49.276702880859	-123.13000488281	anonymous	4	7		Contraception is morally objectionable				1	7		Contraception is morally objectionable				1	4	4	4	2	2	2	1	1	1	1	Canadian	33	6	3	2	1	1
2017-01-09 22:59:13	2017-01-09 23:04:51	0	209.34.24.151	100	337	1	2017-01-09 23:04:52	R_2Eh6isjAR4VCbzu					30.307907104492	-95.431503295898	anonymous	4	7		For the overall health of the women; they will hopefully not be infected with Zika in the first place.			101		7		The same reason I provided last time, health of the woman.			101		7	4	3	4	2	1	2	2	2	2	American	24	6	3	1	2	1
2017-01-09 22:48:24	2017-01-09 23:06:18	0	125.238.212.62	100	1074	1	2017-01-09 23:06:19	R_1Nn8jdbYJ2ChaAr					-37.528198242188	175.71020507812	anonymous	4	2	more effective.		101				4							7	7	4	1	1	1	2	2	2	2	NZ/UK	48yrs	5	3	2	1	3
2017-01-09 23:01:49	2017-01-09 23:08:40	0	172.6.17.82	100	410	1	2017-01-09 23:08:42	R_ugqS5flgRyMA2CR					32.222396850586	-90.829299926758	anonymous	4	5		It seemed to me that it would be more effective at preventing Zika cases; some women are still going to get pregnant even if contraception is freely available.			101		4							3	4	4	2	2	2	3	3	3	1	USA	32	6	3	1	1	1
2017-01-09 23:02:17	2017-01-09 23:13:37	0	189.6.125.46	100	680	1	2017-01-09 23:13:38	R_2WP9Fc51lFQAh8h					-15.783294677734	-47.916702270508	anonymous	4	7		The Aedes mosquitoes spread more diseases than just Zika. Also, there seems to be evidence of Zika affecting children and adults as well.				1	7		Again, the Aedes mosquitoes carry more than just Zika, and Zika affects children and adults, not just fetuses.				1	4	2	4	1	1	1	2	2	2	2	Brazilian	27	5	2	2	2	1
2017-01-09 23:11:31	2017-01-09 23:16:57	0	173.52.76.75	100	325	1	2017-01-09 23:16:58	R_1q52CA3iMNrdqE7					40.625198364258	-73.945701599121	anonymous	4	5		To include women who would refuse contraception.			101		5		Again, to include women who refuse contraception.			101		4	3	2	4	3	1	4	2	2	2	US	43	6	1	2	1	1
2017-01-09 23:09:55	2017-01-09 23:17:45	0	88.106.172.168	100	469	1	2017-01-09 23:17:47	R_32UZDyguTMIRkF8					51.669204711914	-3.3056030273438	anonymous	4	1	more sure methodology.		101				1	avoids a long period of uncertainty		101				4	4	3	1	1	1	2	2	2	2	british	66	6	1	2	1	3
2017-01-09 22:54:19	2017-01-09 23:20:30	0	198.239.77.118	100	1570	1	2017-01-09 23:20:31	R_2xM1FJ2qE5fgSJJ					47.037902832031	-122.90069580078	anonymous	4	4							4							5	6	6	2	2	2	2	2	2	1	UK/USA/NZ	35	5	1	2	2	2
2017-01-09 23:05:08	2017-01-09 23:22:01	0	104.52.62.215	100	1012	1	2017-01-09 23:22:03	R_2ahi7FvvRbNCgjs					30.532104492188	-97.72859954834	anonymous	4	2	Contraception provides a choice for women that limits potential effects the general population might experience with a mosquito repellent		600				6		Because in this scenario it provides more choice to the women. Health concerns aside, it allows them to choose when to have children instead of wait.				1	6	6	6	2	2	2	2	2	2	1	American-U.S.A.	27	5	1	2	1	3
2017-01-09 22:58:05	2017-01-09 23:37:44	0	70.195.140.223	100	2378	1	2017-01-09 23:37:46	R_2fP2lx5NSUVdM5P					42.976104736328	-78.872703552246	anonymous	4	6		I suspect use of repellant would have a higher compliance rate			200		6		Altering timing of births in a forced or artificial way seems a bit draconian and impacts individual's personal liberties			202		4	3	3	3	3	2	2	2	2	1	American	53	6	1	2	1	2
2017-01-09 23:16:47	2017-01-09 23:40:58	0	172.76.184.184	100	1450	1	2017-01-09 23:40:59	R_1mQvxUPIWR9Z8Oo					40.989700317383	-85.033599853516	anonymous	4	7		Kill all mosquitoes everywhere. They are pests. Once gone, no more zika (or other mosquito diseases) ever. Better solution. Also, zika not only spread by sexual transmission. So.			1000	1	7		Informing the public of the possible connection between mosquitoes with zika and microencephaly gives them the ability to decide their own family planning. Are you selling contraception or trying to fix the mosquito problem? Kill the mosquitoes. Period. Not repel the mosquitoes, kill them all.			1000	1	6	6	6	3	3	4	4	4	4	2	United States	49	5	1	2	1	1
2017-01-09 23:49:53	2017-01-09 23:57:48	0	174.255.135.179	100	475	1	2017-01-09 23:57:49	R_2a7rPJfWORny3pH					37.751007080078	-97.821998596191	anonymous	4	1	contraception also keeps unwanted pregnancy rates low.		117	1			1	same as before			1			4	4	4	4	4	4	4	3	3	2	usa	55	5	3	2	2	2
2017-01-10 00:04:44	2017-01-10 00:19:50	0	108.32.74.28	100	905	1	2017-01-10 00:19:51	R_2Et4FstTN6mpQtY					40.499801635742	-80.184196472168	anonymous	4	7		Mosquitoes are the problem here, not babies.				1	7		Mosquitoes are the problem, not babies. Babies are never a problem				1	7	7	7	7	7	7	1	1	1	1	Usa	37	3	1	2	1	1
2017-01-10 00:12:19	2017-01-10 00:23:58	0	124.170.232.142	100	698	1	2017-01-10 00:24:00	R_30bYnwDzMujBpCg					-33.936294555664	151.14819335938	anonymous	4	2	Because it has broader and more long term benefits		200				2	Broader and more long term benefits		201				2	2	2	2	2	2	4	3	2	2	NZ	35	4	3	2	2	2
2017-01-10 00:17:59	2017-01-10 00:24:17	0	173.79.196.74	100	377	1	2017-01-10 00:24:18	R_PGSPQ1Kj10p9Xi1					39.025604248047	-77.077201843262	anonymous	4	7		Doesn't degrade women; allows for the gift of life; doesn't harm women				1	7		Contraception is evil				1	7	7	3	5	5	2	1	1	1	2	American	32	5	2	2	1	1
2017-01-10 00:19:56	2017-01-10 00:31:15	0	70.117.98.171	100	679	1	2017-01-10 00:31:17	R_1fdXOarXTKBElXp					30.454895019531	-97.756500244141	anonymous	4	6		Mosquito repellent is less disruptive to people's lives and gives women more freedom to make choices about when/whether to have children (I'm assuming women can still access contraception if they want it for non-Zika reasons)			101		6		Same answer as before, this doesn't really affect my decision			101		7	3	3	1	1	1	2	2	2	2	USA	20	4	3	2	2	2
2017-01-10 00:36:39	2017-01-10 00:54:21	0	79.76.186.137	100	1062	1	2017-01-10 00:54:22	R_2aLYV2dPwbLSHUL					52.033294677734	-0.69999694824219	anonymous	4	7		Allows people the choice to safely have children				1	7		Lets people choose to have children safely. Contraception lets you avoid microcephaly but only by not having children				1	7	7	7	1	1	1	5	2	5	1	British	34	5	4	2	1	1
2017-01-10 01:06:38	2017-01-10 01:16:07	0	75.141.143.57	100	568	1	2017-01-10 01:16:08	R_3rOOxlAaiTp0LfA					32.658599853516	-97.384201049805	anonymous	4	2			255				4							3	3	5	3	3	3	4	4	4	2	Latina	23	4	2	2	2	3
2017-01-10 00:01:30	2017-01-10 01:19:33	0	50.68.118.23	100	4683	1	2017-01-10 01:19:35	R_2zI2mmcbIi9FoHm					49.36149597168	-123.2626953125	anonymous	4	1	Contraception should be available to all, even without the threat of zika. Also mosquito repellant doesn't totally protect anyone from being bitten, so contraception is more likely to prevent the pregnancies in the first place.		977	1			1	I laready andwered ths question			1			1	1	1	4	4	3	4	4	4	2	Canadian	66	6	5	1	1	2
2017-01-09 23:23:59	2017-01-10 01:42:15	0	117.194.37.218	100	8295	1	2017-01-10 01:42:17	R_Aj3burBUtrincR3					22.569702148438	88.369689941406	anonymous	4	7		One could have the child and yet avoid the infection			1000	1	7		One could have the child and yet avoid the infection			1000	1	1	1	1	1	1	1	5	5	5	1	Indian	60	6	5	2	1	1
2017-01-10 01:39:58	2017-01-10 01:46:47	0	24.77.142.98	100	408	1	2017-01-10 01:46:48	R_3HhOqIFSW1lIe0i					49.862503051758	-97.166496276855	anonymous	4	7		mosquito repellent is likely to prevent transmission of other mosquito-borne diseases as well. overly strong promotion of contraception may prevent some women from having children who would have wanted them.			627		7		As previously stated. if all else is equal, women who would like to have children should not be prevented/pressured not to.			648		6	6	5	3	3	1	2	2	1	2	Canadian	30	6	1	2	2	1
2017-01-10 02:10:03	2017-01-10 02:17:24	0	203.16.246.2	100	441	1	2017-01-10 02:17:26	R_eWJNoXqJd2ftWbT					-37.860000610352	144.97171020508	anonymous	4	1	Not sure.		310	1			1	Because it seems to be easier for the mother to remember.		356	1			5	5	5	1	2	1	5	5	5	1	Australian	37	6	4	2	2	2
2017-01-10 02:10:02	2017-01-10 02:21:03	0	174.2.128.62	100	660	1	2017-01-10 02:21:05	R_27DvkU4qMEaKbrn					53.199996948242	-105.75	anonymous	4	2	Uncertainty of whether the mosquito repellent would be easy to apply, that it would certainly be effective, and that it was truly readily available.		200				2	Delaying pregnancy would allow for the parent or parents to create a better nest egg, there's no certainty despite the fact mosquito repellent is free that it would be easily accessible, and I wonder whether the mosquito repellent would be easy to apply, whether it might have other effects that may impact the adults and their potential children.		200				4	3	4	2	1	1	2	2	2	1	Canadian	45	6	3	2	2	3
2017-01-10 02:10:29	2017-01-10 02:23:44	0	192.230.180.182	100	794	1	2017-01-10 02:23:45	R_1zG7mjVybTTtuLf					35.761199951172	-81.727996826172	anonymous	4	4							4							4	7	4	3	2	1	5	1	1	2	USA	69	5	1	2	1	3
2017-01-10 02:17:06	2017-01-10 02:24:59	0	47.197.232.101	100	472	1	2017-01-10 02:25:00	R_24MIqHKzL0YAvwq					27.921997070312	-82.5	anonymous	4	6		Allows women to choose when to have children			297		6		Same reason as first--allows for choice of pregnancy, including during Zika period			297		3	3	2	1	1	1	2	2	2	1	American	21	4	4	2	2	2
2017-01-10 02:31:15	2017-01-10 02:40:38	0	103.248.84.77	100	562	1	2017-01-10 02:40:39	R_2QGHTvmlVlJo5zu					28.466705322266	77.033294677734	anonymous	4	6		Mosquito repalent would bring down the overall incidence of Zika Virus thereby providing benefit not only to potenial mothers but whole of society				1	6		Reason same as last answer			925	1	4	5	3	4	4	3	4	4	4	1	Indian	29	6	1	2	2	3
2017-01-10 02:40:45	2017-01-10 02:49:31	0	203.213.244.178	100	526	1	2017-01-10 02:49:33	R_300Ewbz2nRRbqwM					-37.800003051758	144.96670532227	anonymous	4	1	The women should have access to contraception that they need anyway and the problem is only serious for preg women		101				1	Nothing has changed about the scenario outcomes from the first time the question was asked		101				4	3	4	2	2	2	2	2	2	2	Australian	24	5	1	2	2	2
2017-01-10 02:45:49	2017-01-10 03:03:41	0	137.97.191.98	100	1071	1	2017-01-10 03:03:43	R_A4gvU0zAnLGuRRn					9.9667053222656	76.233306884766	anonymous	4	7		There are pregnant women already, we need two have both mechanisms, like contraception and mosquito repellent. In the first page of survey we don't have choice to choose both or some percentage of both mechanisms.				1	7		There are already pregnant women so we need to have both mechanisms in place				1	4	7	7	1	1	7	1	1	1	1	Indian	37	5	1	2	1	3
2017-01-10 03:14:19	2017-01-10 03:25:25	0	71.161.91.82	100	665	1	2017-01-10 03:25:26	R_3oS1icxkjeTSusu					42.875198364258	-72.848602294922	anonymous	4	7		Dual benefit. Lower incidence of microcephaly and lower incidence of adults with Zika.			200		7		Dual benefit. Reduced microcephaly and fewer adult cases of Zika, which may actually slow the disease spread.			563		3	2	2	1	1	1	5	5	4	1	USA	55	5	3	2	2	2
2017-01-10 02:23:56	2017-01-10 03:34:35	0	190.171.27.34	100	4239	1	2017-01-10 03:34:37	R_24eHhan79TK6zyV					9.9333038330078	-84.083297729492	anonymous	4	4							4							4	3	3	2	1	3	2	2	2	1	Canada	40	6	1	2	1	2
2017-01-10 03:51:12	2017-01-10 03:57:35	0	197.89.100.63	100	383	1	2017-01-10 03:57:37	R_3mmEjVclo8ZLFsk					-29.850006103516	31.016693115234	anonymous	4	4							4							7	7	7	2	2	2	5	2	3	2	South African	57	6	1	2	1	2
2017-01-10 04:10:04	2017-01-10 04:19:13	0	73.157.139.185	100	549	1	2017-01-10 04:19:15	R_1l06N3esflgnTcz					44.625106811523	-123.13090515137	anonymous	4	7		Contraceptive lifestyle degrades families			200	1	7		Contraceptive lifestyle degrades families			341	1	7	7	7	2	1	3	1	1	1	1	USA	32	6	3	2	1	1
2017-01-10 04:13:12	2017-01-10 04:26:38	0	107.77.208.111	100	806	1	2017-01-10 04:26:40	R_8vQIHhiWPdCx1wl					41.848297119141	-87.651702880859	anonymous	4	2	Free contraception for poor women would be useful to them in ways other than just preventing Zika. I would be in favor of giving out free cobtraception even in the absence of a Zika outbreak.		200				2	I still consider contraception generally more important than mosquito repellant even in the absence of an outbreak of something like Zika.		200				2	2	2	1	1	1	2	2	2	1	American	22	5	3	2	2	3
2017-01-10 05:11:21	2017-01-10 05:15:08	0	107.77.205.9	100	226	1	2017-01-10 05:15:09	R_1Gx1jEXIYgFeG83					45.523406982422	-122.6762008667	anonymous	4	4							4							4	3	4	1	1	4	4	4	4	1	US	60	4	1	1	2	1
2017-01-10 05:17:54	2017-01-10 05:25:21	0	66.76.161.245	100	447	1	2017-01-10 05:25:23	R_sU0ww1dQDc7IAyR					32.56950378418	-93.69229888916	anonymous	4	6		I feel that people shouldn't have to delay having children, should they desire one, when there is another option			119		6		Teh same reason as before. If equally effective I'd always go with the option that allows the masses a maximum of personal freedom.			119		7	5	3	7	4	3	4	4	4	1	American	37	5	2	2	2	3
2017-01-10 05:18:05	2017-01-10 05:29:09	0	59.178.184.104	100	663	1	2017-01-10 05:29:10	R_1kUIEuJAanvH6HO					28.600006103516	77.200012207031	anonymous	4	7		Because of the ethical implications of controlling women's bodies; also not all foetuses develop microcephaly for certain.				1	7		Again, I have a problem with policy that tries to control a public health problem through the control of women's bodies.				1	7	6	4	2	2	4	2	2	2	2	Indian	29	6	3	2	2	2
2017-01-10 05:18:32	2017-01-10 05:34:19	0	189.122.225.132	100	946	1	2017-01-10 05:34:20	R_3EIeTLbzRDF0YVz					-22.88639831543	-43.203704833984	anonymous	4	7		Freedom pf choice for women over when they want to have a child			200		7		Freedom pf choice for women pver when they want to get pregnant			174		4	5	3	2	2	2	3	3	3	2	Brazilian	31	6	5	2	2	1
2017-01-10 05:44:40	2017-01-10 05:59:53	0	73.95.132.124	100	913	1	2017-01-10 05:59:55	R_2VHYiyCjUV6GLe1					39.7041015625	-104.93389892578	anonymous	4	3	It seemed that contraception would help these girls in more ways than just the zika virus.		201				3			207				6	6	6	2	2	2	2	2	2	1	United States	23	5	3	1	2	1
2017-01-10 05:49:26	2017-01-10 06:00:15	0	1.152.97.90	100	649	1	2017-01-10 06:00:17	R_3huczxpb5FYbUCH					-37.819000244141	145.15328979492	anonymous	4	7		You can't stop people from attempting to conceive by giving them condoms. If they truly want a child, regardless of the risks, then the best way to to reduce the risk for that person is to offer them effective repellent.			1000	1	7		Same answer as before.			101	1	2	2	2	7	7	1	4	4	4	1	Australian	27	6	1	2	2	2
2017-01-10 08:02:20	2017-01-10 08:10:14	0	61.68.97.248	100	473	1	2017-01-10 08:10:15	R_3RyzmNKTljNLCug					-33.859100341797	151.2001953125	anonymous	4	6		Prevention is better than a cure. If they're equally effective and safe, it's better to prevent people getting infected in the first place than to let them get infected and then scramble to manage the consequences			101		6		Same answer as before			101		6	4	4	1	2	2	2	2	2	1	Australian	24	5	3	2	2	2
2017-01-10 08:28:31	2017-01-10 08:40:08	0	71.102.126.157	100	696	1	2017-01-10 08:40:09	R_3g71bwDdToCliWZ					41.248992919922	-75.961502075195	anonymous	4	5		Protects more people from virus.			110		5		Still repellent protects more people make and female, pregnant or not. Contraception only delays or prevents pregnancy.			110		4	4	3	3	3	3	4	3	3	2	American	42	4	4	1	1	2
2017-01-10 09:59:12	2017-01-10 10:05:06	0	110.227.77.150	100	353	1	2017-01-10 10:05:08	R_wTaqlBhs93ipRu1					22.569702148438	88.369689941406	anonymous	4	6		Contraception isn't always effective at preventing pregnancy and the root of the problem is with mosquitos, so keep them away!			121		4							6	6	3	4	2	2	4	3	4	1	Indian	23	5	3	2	2	2
2017-01-10 10:34:09	2017-01-10 10:53:43	0	83.244.244.66	100	1173	1	2017-01-10 10:53:44	R_3Mg0BIFHj0VOb4l					51.483306884766	-0.26669311523438	anonymous	4	2	Unknown effects of repellent on the environment. Free contraception can also help lessen the spread of STDs etc.		640				2	The argument of one individual being born over a potential individual is irrational (to me).		601				6	4	5	1	1	2	2	2	2	2	French/Irish	28	5	2	2	2	3
2017-01-08 13:43:22	2017-01-10 12:18:20	0	108.45.93.80	100	167698	1	2017-01-10 12:18:22	R_1FmP7iDNiFI5xaF					39.235107421875	-77.139602661133	anonymous	4	1	We do not know all that is needed to be known about the Zika virus and therefore should not risk having kids		580	1			4							1	1	1	1	1	1	5	5	5	1	United States	24	4	1	2	2	3
2017-01-10 12:09:22	2017-01-10 12:20:39	0	145.28.194.216	100	677	1	2017-01-10 12:20:39	R_4HJxy3vNInOVMnX					52.353500366211	4.8901977539062	anonymous	4	7		Because some women may not be able to postpone pregnancy, and if mosquito repellent is just as effective that allows families to make their own decisions regarding when to have a baby insofar as possible			105		7		same as before, because it allows families to decide when to have a baby themselves (and some women cannot postpone a pregnancy)			105		5	3	4	1	2	2	2	2	2	2	Dutch	23	6	5	2	2	3
2017-01-09 22:22:39	2017-01-10 13:18:11	0	66.115.199.167	100	53731	1	2017-01-10 13:18:12	R_1ISGM1jdNwtJwNk					41.600494384766	-93.609100341797	anonymous	4	1	seems like it'd be more effective for the risks. also i don't want another baby right now.		101				1	i don't deal in possibilities i guess?		101	1			7	7	4	1	1	4	2	2	2	1	United States of America	33	5	2	2	1	2
2017-01-10 15:35:02	2017-01-10 15:51:21	0	88.4.12.13	100	979	1	2017-01-10 15:51:29	R_xeWVdAwigAo0Teh					41.655197143555	-4.7236938476562	anonymous	4	7		Because women should have the right to get pregnant and this solution wont affect the natality of the country as the other option did			422		7		Babies should be born when their parents want them to be, there is no point on dealying the birth of the baby because then, it will be another person			933	1	5	6	7	2	1	1	2	2	2	2	Spanish	18	5	2	2	2	3
2017-01-10 15:49:24	2017-01-10 16:04:03	0	219.91.153.48	100	879	1	2017-01-10 16:04:05	R_3LjSV0WUR15Itoc					18.533294677734	73.86669921875	anonymous	4	5		so that women don't have to go through the trouble of hormonal changes			200		5		to let the natural course of things and not affect the babies or harm them in anyway			200		3	5	3	2	5	3	3	2	2	1	Indian	20	5	2	2	2	3
2017-01-10 16:09:59	2017-01-10 16:19:25	0	108.219.179.52	100	565	1	2017-01-10 16:19:27	R_tLrcT6X9v4A6AJb					29.950500488281	-90.205703735352	anonymous	4	4							4							6	6	6	2	2	4	2	2	2	1	USA	71	6	3	2	2	3
2017-01-10 16:09:46	2017-01-10 16:19:34	0	128.103.28.54	100	587	1	2017-01-10 16:19:35	R_PTmwpR8VopDw1ix					42.380004882812	-71.13289642334	anonymous	4	4							4							3	3	3	3	3	3	2	2	2	1	American	27	6	5	2	2	3
2017-01-10 16:23:12	2017-01-10 16:35:52	0	99.59.187.120	100	760	1	2017-01-10 16:35:55	R_3lEUdpjKQBlAogJ					42.188995361328	-87.806297302246	anonymous	4	1	Free contraception has additional benefit in family planning		735				1	Delaying pregnancy throw contraception until it is safe or until the woman can afford her own repellent improves future lives of the woman and her children		735				6	4	5	1	1	1	5	3	4	2	Russian	30	5	2	2	1	2
2017-01-10 17:16:14	2017-01-10 17:25:20	0	179.212.91.143	100	545	1	2017-01-10 17:25:21	R_r0GV9dPG0sUY90d					-23.666702270508	-46.516693115234	anonymous	4	7		I believe couples have the right to decide when/if they want children. I believe contraception is a right as well, but the couples who want children should not have to delay having them (especially the older ones) due to the outbreak			151		7		Conception is always random to an extent in the sense that there is little control over which sperm cell fertilizes the egg, and who is the person that is born. The decision between contraception and repellent should be made based on numbers only.			150		7	3	3	5	5	3	3	3	3	1	Brazilian	26	5	2	2	2	3
2017-01-10 16:24:35	2017-01-10 17:30:21	0	71.92.164.130	100	3946	1	2017-01-10 17:30:23	R_1PREgoPkM4kK1Be					37.751007080078	-97.821998596191	anonymous	4	6		women who did become pregnant would be protected				1	6		women should be the one to determine when they have children				1	2	2	6	1	1	1	5	3	3	2	USA	59	6	4	2	1	2
2017-01-10 16:19:57	2017-01-10 17:36:01	0	204.167.92.26	100	4564	1	2017-01-10 17:36:03	R_24H7qpSk1fOvonU					42.364593505859	-71.102798461914	anonymous	4	2	I felt that this method would be more productive.		101				2	I thought contraception may be more productive in keeping babies healthy.		101				6	4	5	3	2	2	2	2	2	1	American	26	6	4	1	2	3
2017-01-10 10:02:06	2017-01-10 17:42:58	0	189.13.164.1	100	27652	1	2017-01-10 17:42:59	R_23VIBHEkMfGd38B					-20.38330078125	-43.5	anonymous	4	7		There is no way to know when the Zika outbreak will end. The repellent resguards the women's choice in having children and prevents contamination.			101		4							1	1	3	7	1	1	3	3	3	1	Brazillian	20	2	3	1	2	2
2017-01-10 17:29:15	2017-01-10 17:51:19	0	47.31.59.154	100	1323	1	2017-01-10 17:51:21	R_2QtWo1vsXTUTO48					28.600006103516	77.200012207031	anonymous	4	6		It will safeguard already pregnant women. also, it will help against other diseases as well.			321		6		It safeguards the already existing feotus unlike contraceptives and protects against other diseases too.			363		6	6	7	1	1	2	1	1	1	1	Indian	26	6	1	2	2	1
2017-01-10 17:37:30	2017-01-10 17:55:31	0	24.85.225.94	100	1080	1	2017-01-10 17:55:33	R_33BwJBUdypfPAxK					49.264602661133	-123.16479492188	anonymous	4	1	Contraception has the possibility of collateral positives; opportunity for family planning, etc		1000				1	Same reason as before		1000				4	6	4	1	1	1	4	3	3	2	Canadian	48	6	2	2	1	3
2017-01-10 17:55:28	2017-01-10 18:01:46	0	122.176.188.76	100	378	1	2017-01-10 18:01:49	R_2Y99wVbqhDv4Rm0					28.600006103516	77.200012207031	anonymous	4	6		Because it avoids the limitation on procreation.				1	6		For the same reason				1	4	4	4	4	2	4	4	4	4	1	Indian	27	5	2	2	2	2
2017-01-10 17:57:29	2017-01-10 18:04:40	0	45.50.178.97	100	430	1	2017-01-10 18:04:41	R_6VDsmC9dZGX3fcl					34.048599243164	-118.44239807129	anonymous	4	1	Because it would have positive knock on effects in terms of family planning even beyond the zika outbreak.		200				1	Giving me that extra information does not affect my choice.		200				3	1	1	2	2	2	2	2	2	1	USA	21	5	3	2	2	3
2017-01-10 17:52:33	2017-01-10 18:06:32	0	129.74.238.8	100	839	1	2017-01-10 18:06:34	R_31ilMbnRrBLjcSQ					41.700698852539	-86.250099182129	anonymous	4	7		Because contraception does not get at the root of the problem, which is the spread of Zika virus; contraception only addresses the incidence of pregnancy. With mosquito repellant, women's rights (and family rights) to seek pregnancy are protected.				1	7		Contraception does not get at the core issue, and mosquito repellant reduces the incidence of Zika (and consequently of microcephaly) without inhibiting the woman's (and her partner's) ability to seek pregnancy. It is immoral for an entity to pursue temporary sterilization as the only "assistance," as if pregnancy rather than Zika were the problem.				1	7	7	7	1	1	1	1	1	1	2	US	28	6	3	2	2	1
2017-01-10 18:06:25	2017-01-10 18:19:26	0	120.59.169.71	100	780	1	2017-01-10 18:19:28	R_qzm4vPlX1nV3Ul3					28.666702270508	77.216705322266	anonymous	4	2			101				6					101		5	4	5	2	2	2	3	3	2	2	Indian	22	5	1	2	2	3
2017-01-10 19:04:57	2017-01-10 19:18:53	0	66.87.117.48	100	835	1	2017-01-10 19:18:54	R_27d3VM01tLrZNXt					40.830902099609	-73.906997680664	anonymous	4	3	I think it is a good idea to Provide free contraception. There are many benefits beyond stopping the The disease.		101				3	Contraception has many social benefits other then stopping the disease.		101				2	2	2	2	2	2	4	3	3	1	American	49	5	2	1	2	2
2017-01-10 04:39:15	2017-01-10 20:27:35	0	174.89.245.122	100	56900	1	2017-01-10 20:27:36	R_p01eQk0ivTDp82J					45.543792724609	-73.592697143555	anonymous	4	6		As long as it's equally effective it's a better choice because it allows people to remain in control of when they have babies			101		6		I think which baby is born is irrelvant, I chose to fund mosquito repellent for the same reason as before			101		6	6	7	3	2	2	4	2	2	2	American	20	4	3	2	2	3
2017-01-10 20:34:25	2017-01-10 20:44:28	0	129.123.122.216	100	602	1	2017-01-10 20:44:29	R_3NKfcHlMj9noAXc					41.641204833984	-111.89659881592	anonymous	4	2	Mosquito repellant is more obnoxious to use than contraceptives, and more people would need to regularly use it.		110				2	Same reasoning as before. The delaying conception effect is negligible.		110				2	2	2	3	2	1	4	4	2	1	American (United States)	26	5	3	2	2	1
2017-01-10 20:42:34	2017-01-10 20:50:10	0	162.13.152.211	100	456	1	2017-01-10 20:50:10	R_bCTkC0Fmh06gngF					51.449996948242	-2.5832977294922	anonymous	4	6		Allow people to choose whether to have children if now is the time they want them			101		6		Because your example is basically my reasoning for my answer			101		4	4	3	6	2	2	2	2	2	2	British	30	6	1	2	2	3
2017-01-10 21:20:23	2017-01-10 21:27:49	0	49.183.175.107	100	446	1	2017-01-10 21:27:50	R_3EaqnWTf551MSw7					-38.033294677734	145.25	anonymous	4	7		Greatest good for greatest number - protects against other mosquito borne diseases, no impact on reproductive choice/rights, no impact on future demographics				1	7		No impact on demographics, less invasive, preventing spread of other mosquito borne disease				1	4	4	5	4	2	3	4	3	3	2	Australian	32	6	1	2	2	3
2017-01-10 21:22:19	2017-01-10 21:49:30	0	179.218.18.177	100	1631	1	2017-01-10 21:49:32	R_3Odom1g5gVLbRYB					-22.88639831543	-43.203704833984	anonymous	4	1			101	1			1			101				1	4	1	1	1	1	5	5	1	3	Brazilian	25	6	5	1	2	3
2017-01-10 21:17:59	2017-01-10 21:49:36	0	179.218.18.177	100	1896	1	2017-01-10 21:49:37	R_72HbVzwRIsjb41H					-22.88639831543	-43.203704833984	anonymous	4	1			101				1			101				1	1	1	4	1	1	5	5	1	2	brazilian	55	6	3	2	2	2
2017-01-10 22:29:43	2017-01-10 22:36:56	0	142.161.83.166	100	433	1	2017-01-10 22:36:58	R_2aesD74rS1bDcgh					50.011001586914	-97.218399047852	anonymous	4	4							4							3	5	4	1	1	1	4	4	4	1	Canadian	29	4	1	2	2	2
2017-01-10 22:20:36	2017-01-10 22:37:05	0	179.153.2.148	100	988	1	2017-01-10 22:37:06	R_3ewCTtDAotTwRLo					-23.473297119141	-46.665802001953	anonymous	4	2	Contraception focus in a major problem, including any other desease anso social issues		906				2	Contraception target the main problem that is unwanted pregnancy		901				6	6	6	5	2	3	3	3	3	1	Brasil	55	6	4	2	1	2
2017-01-10 22:55:36	2017-01-10 23:06:57	0	128.177.12.30	100	681	1	2017-01-10 23:06:59	R_3qxt5dphmYu3XgX					47.602600097656	-122.3283996582	anonymous	4	1	Contraception is also effective against other illnesses		101				1	Contraception is also effective against other illnesses. Additionally, saying "Thomas" would exist instead of "Tanya" is pure speculation. Maybe Tanya would have still born, but healthy and a few years younger.		101				7	4	4	4	4	4	3	3	3	2	United Statesian	33	4	3	1	2	2
2017-01-10 22:50:50	2017-01-10 23:16:37	0	138.36.179.148	100	1547	1	2017-01-10 23:16:38	R_VXy5GbcCu4TNQn7					-8.38330078125	-36.550003051758	anonymous	4	7		No direct interference in the woman's body.			500		7		No interference over who is to be born.			500		3	3	3	2	2	2	3	3	3	1	Brazilian	53	6	3	1	2	1
2017-01-10 23:02:24	2017-01-10 23:43:05	0	24.6.178.117	100	2441	1	2017-01-10 23:43:07	R_OjQvsLD6EKfL8ad					37.567001342773	-121.98289489746	anonymous	4	7		In case if someone don't want to delay in her conception process			101		7		Useing mosquito repellent i don't have to delay my pregnency and baby will be free of zika infaction			103		4	3	4	2	2	1	4	3	2	2	Indian	32	5	1	2	1	1
2017-01-10 23:22:50	2017-01-10 23:47:12	0	78.141.103.75	100	1461	1	2017-01-10 23:47:14	R_cJev6hq2Ruh0JgJ					48.149993896484	17.11669921875	anonymous	4	6		prioritize our species, rather prevent "predator" action (mosquito bites) than limit our functionalities (get pregnant)			750		6		same reason, rather let spreading our species			750		5	3	5	2	4	3	5	5	5	1	slovak	29	2	1	1	2	3
2017-01-10 23:29:14	2017-01-10 23:50:48	0	72.51.127.124	100	1294	1	2017-01-10 23:50:50	R_1HdHGwM0W0ewYeE					18.416702270508	-64.61669921875	anonymous	4	6		Repellent does not require the public to put their plans to conceive on hold...nor does it strongly infringe on their personal freedoms			712	1	6		The impact of ' treatment' will be minimal with repellent.			592	1	5	5	5	3	2	3	2	2	2	2	British Virgin Islander	34	6	1	2	1	1
2017-01-11 00:21:39	2017-01-11 00:26:25	0	106.220.140.194	100	285	1	2017-01-11 00:26:26	R_2zUqjWD31n2Z70r					17.375305175781	78.474395751953	anonymous	4	4							4							4	4	3	2	2	1	4	4	4	3	India	23	6	4	2	2	2
2017-01-11 00:30:40	2017-01-11 00:46:52	0	14.139.82.6	100	972	1	2017-01-11 00:46:54	R_24O6Bc6KXgz0vqY					17.375305175781	78.474395751953	anonymous	4	6		Enforcing contraception measures seems to harsh a regulation to be imposed over the masses whereas repellent measures results in the same outcome with much less of a mental fatigue.			400		6		Same as previous + in order to let agencies play out the role in their normal course of action with minimal diversions			400		2	3	5	4	4	4	1	1	1	1	Indian	23	5	1	2	2	3
2017-01-11 00:35:03	2017-01-11 01:28:39	0	158.121.251.126	100	3216	1	2017-01-11 01:28:40	R_25AcVBI9bV5vW9c					42.315902709961	-71.05590057373	anonymous	4	5		reproductive freedom			131		6		reproductive freedom			101		2	2	3	2	3	3	5	4	5	1	US	55	6	5	1	1	1
2017-01-11 01:10:18	2017-01-11 01:30:20	0	131.161.206.218	100	1201	1	2017-01-11 01:30:21	R_2ffEbUSx1rQIkIE					-3.1999969482422	-52.199996948242	anonymous	4	3	Uma questão de controle populacional !		171	1			2			553	1			1	4	3	2	2	2	4	4	4	1	Brasileiro	59	2	1	2	2	2
2017-01-11 03:46:08	2017-01-11 03:56:53	0	73.162.92.183	100	645	1	2017-01-11 03:56:54	R_WiyCk7CpZfa0e6B					38.23469543457	-122.29769897461	anonymous	4	1	If the point being s tonorevent babies being born with microcephaliy, then preventing conception in the first place is more effective than trying to prevent infection.		211				4							4	4	3	4	2	2	4	3	3	2	American	51	6	3	1	2	2
2017-01-09 08:38:48	2017-01-11 07:39:41	0	76.178.144.183	100	169252	1	2017-01-11 07:39:42	R_1hSbMEpp3wjLfRZ					46.732192993164	-117.24549865723	anonymous	4	4							4							2	2	2	3	3	4	2	2	2	1	United States	23	5	1	2	2	2
2017-01-11 09:42:12	2017-01-11 09:57:16	0	43.250.252.254	100	904	1	2017-01-11 09:57:18	R_1dAhuVTjrAbj1Wt					26.850006103516	80.916687011719	anonymous	4	6		Reproduction is a natural ..why contraception only for women..what about men			114	1	2	To control population		116				6	6	6	1	1	1	4	4	4	1	Indian	22	4	1	2	2	2
2017-01-11 09:52:33	2017-01-11 10:03:42	0	14.202.67.34	100	668	1	2017-01-11 10:03:43	R_2z744JYsSJ0q6hX					-27.416702270508	152.96670532227	anonymous	4	5		Better for people to be able to get pregnant if safe to do so.			101		6		This is the scenario I imagined when answering the first question.			101		6	7	7	7	6	4	1	1	1	1	Australian	44	5	1	1	1	1
2017-01-11 11:22:07	2017-01-11 11:25:50	0	148.88.173.251	100	223	1	2017-01-11 11:25:51	R_1Hcv9J3pks0033u					54.046493530273	-2.7996978759766	anonymous	4	4							4							2	6	4	2	6	4	3	3	3	1	British	42	6	5	1	1	2
2017-01-11 13:44:26	2017-01-11 14:15:58	0	200.203.142.43	100	1891	1	2017-01-11 14:16:00	R_a62rP9WoC7zMFi1					-23.433303833008	-51.86669921875	anonymous	4	7		There are a lot of reasons. First of all, the contraception is not supposed to be just a woman's responsibility. Another reason is that it was not specified the type of contraception, but if it is about taking pills, it entails side effects for womans. And other reason is that the repellents help in reducing the spread of the disease as a whole, as it prevents people from being infected and conse…				1	7		Same reason as before, There are a lot of reasons. First of all, the contraception is not supposed to be just a woman's responsibility. Another reason is that it was not specified the type of contraception, but if it is about taking pills, it entails side effects for womans. And other reason is that the repellents help in reducing the spread of the disease as a whole, as it prevents people from b…				1	7	6	4	1	1	1	2	1	1	2	Brazil	33	6	3	2	2	3
2017-01-11 17:19:42	2017-01-11 17:37:25	0	103.31.189.202	100	1063	1	2017-01-11 17:37:25	R_3UDyXeciWTHzk8d					22.569702148438	88.369689941406	anonymous	4	7		Mosquito repellent tackles the problem one step before contraception, i.e. closer to the 'root problem' also has other positive effect e.g. malaria prevention, also changing mentality around sex is significantly more difficult, psycologically, culutrally etc. where as mosquitos are already a 'nuisance'.			301	1	7		Same reason as given before				1	4	2	2	7	7	3	3	3	3	1	Namibian	24	5	3	1	2	3
2017-01-11 17:52:41	2017-01-11 18:06:23	0	45.115.189.107	100	821	1	2017-01-11 18:06:25	R_3rMAf4w5Zv0rh6Q					28.570007324219	77.320007324219	anonymous	4	7		Because it is 100% safe and foolproof.			101	1	7		Because at least the woman won't contract the virus.			101	1	7	5	2	1	4	4	4	2	2	2	Indian	25	6	1	2	2	1
2017-01-11 17:44:05	2017-01-11 18:29:57	0	122.102.118.234	100	2752	1	2017-01-11 18:30:00	R_2tmxXIlD1dQJpe3					13.083297729492	80.283294677734	anonymous	4	7		Mosquito repellent is equally effective and safe so, at the time of the out break women who are alredy pregnant can save their babies from any potential zika infection.			101		7		Reason is same as previous. At the moment of outbreak women who already had conceived can make sure that their babies will be infection free by using mosquito repellent.			101	1	4	3	2	4	2	2	4	4	2	1	Indian	28	5	1	2	2	2
2017-01-11 23:13:12	2017-01-11 23:19:46	0	71.161.100.188	100	393	1	2017-01-11 23:19:47	R_1HqUdfPTrPisPET					43.882995605469	-72.839897155762	anonymous	4	7		Because it will protect everyone not just pregnant women,.			101	1	7		Once again, mosquito repellent protects everyone not just pregnant women			1000	1	2	2	1	1	1	1	5	5	5	1	USA	72	6	4	2	1	1
2017-01-12 00:59:06	2017-01-12 01:11:36	0	92.21.55.225	100	749	1	2017-01-12 01:11:37	R_3GiFKe6jfwTAk8Z					51.466705322266	-0.10000610351562	anonymous	4	6		Women should be allowed to choose when to become pregnant.			189		6		For the same reason as before: I want to protect women's right to self-determination.			182		6	6	7	1	1	1	2	2	1	2	Swedish	24	5	4	2	2	2
2017-01-11 22:12:07	2017-01-12 01:52:01	0	191.248.180.238	100	13194	1	2017-01-12 01:52:03	R_3QJLjHKtlwEYzJP					-23.473297119141	-46.665802001953	anonymous	4	1	It is most efficient than the repellent		101				4							2	2	2	3	2	2	5	5	5	1	Brazil	27	6	5	1	2	2
2017-01-12 04:55:20	2017-01-12 05:07:09	0	137.159.152.179	100	709	1	2017-01-12 05:07:11	R_xAaG5bFRlOweso1					34.025802612305	-118.78039550781	anonymous	4	4							3	Because I want Thomas to exist more than Tanya		150				4	5	2	2	1	1	2	2	2	1	Kazakhstan	20	2	1	2	2	3
2017-01-12 04:53:05	2017-01-12 05:20:50	0	137.159.121.236	100	1665	1	2017-01-12 05:20:51	R_3fE3Uo0IZOzrdp0					34.025802612305	-118.78039550781	anonymous	4	6		To protect women who are already pregnant, since they could not have forseen the risk of microcephaly in getting pregnant. It seems more just to reduce the number of people blindsided by their child's microcephaly.			401		6		To avoid the injustice of already-pregnant women being blindsided by the threat of microcephaly and left defenseless against Zika.			401		4	7	5	2	7	2	3	3	3	1	American	20	4	4	2	2	1
2017-01-12 05:41:59	2017-01-12 05:52:16	0	67.160.166.232	100	617	1	2017-01-12 05:52:17	R_patQmtiS62yvtD3					44.902297973633	-123.06620025635	anonymous	4	6		There is no help for those who may chose to be prefers w the contraception			299		6		It allows the choice to get pregnant when she wants			538		4	3	3	1	4	1	2	2	2	2	Lesotho/USA	40	6	1	2	2	3
2017-01-12 06:55:18	2017-01-12 07:19:32	0	100.15.10.96	100	1454	1	2017-01-12 07:19:34	R_22lwNWJ0dOHaUFx					38.625900268555	-76.977897644043	anonymous	4	2	costs vs benefits; not only do contraceptives prevent overpopulation, but they also do not harm the environment the way a mosquito repellent can.		375				3	even if the repellent was safe, the question of human population is still important and can only be addressed through contraception.		101				1	1	1	1	1	1	1	1	1	1	American	29	5	4	1	2	2
2017-01-12 08:16:17	2017-01-12 08:28:33	0	47.31.219.39	100	736	1	2017-01-12 08:28:36	R_25z2VRKuByfidrW					28.600006103516	77.200012207031	anonymous	4	7		In many cases contraception and pregnancy aren't a choice - familial/social pressures etc. Without accurate information on whether all women would be able/willing to use contraceptives, repellent makes more sense.			101		7		Gives the mother/parents greater freedom over family planning			101		5	7	3	4	2	3	4	4	4	2	Indian	23	6	1	2	2	3
2017-01-12 09:45:47	2017-01-12 10:02:17	0	118.189.208.77	100	990	1	2017-01-12 10:02:19	R_XhWhJNNJbTurPS9					1.2855072021484	103.85650634766	anonymous	4	6		Uncertain about whether 'effectiveness' refers to single instances of contraception/repellent usage, or if they are equally effective overall (in preventing microcephaly in the population) - assuming the former, it seems like mosquito repellent is more convenient/has less stigma (religious/cultural) associated with it, and is (thus) more likely to be used by pregnant women. Also, mosquito repelle…			105		6		For the same reasons as previously stated - changing the babies which exist has no bearing on the matter, although the possibility of a sudden increase in birth rates post-zika (if contraception is funded) seems to be a potential (foreseeable) problem, which is not the case with repellent.			180		4	3	3	3	3	3	5	5	5	2	Singaporean	20	4	4	2	2	3
2017-01-12 14:43:45	2017-01-12 14:52:10	0	103.193.60.243	100	504	1	2017-01-12 14:52:12	R_3RmbNCjK1mDSrSs					20.233306884766	85.833312988281	anonymous	4	5		Because the policy choice is easier to communicate			101		5		Because it is easier to explain as a policy			101		1	1	7	1	1	1	2	2	2	1	Odia	32	6	5	1	2	3
2017-01-12 15:58:28	2017-01-12 16:05:28	0	217.155.178.150	100	420	1	2017-01-12 16:05:29	R_pH4NxCJJ1MsPEs1					52.20930480957	0.148193359375	anonymous	4	4							4							2	2	2	2	2	2	4	4	4	1	British	58	5	1	2	1	2
2017-01-12 15:39:25	2017-01-12 16:26:56	0	103.217.147.110	100	2850	1	2017-01-12 16:26:58	R_RPN4D1w0KBfDJgB					9.9833068847656	76.283294677734	anonymous	4	5		Because providing free contraception as a solution is a restrictive approach; people shouldn't have the state telling them when to have children. Those who are aware of the risks can choose to deliver or delay their pregnancy themselves.			200		7		free contraceptives are more intervening, the choice should be the parents'			262	1	6	6	7	1	1	1	2	2	2	2	Indian	27	6	1	2	2	3
2017-01-12 19:17:08	2017-01-12 19:32:43	0	116.202.189.101	100	934	1	2017-01-12 19:32:45	R_1dLYDRjLey0TAR2					12.983306884766	77.583312988281	anonymous	4	1	Contraception has greater social benefits than Mosquito Repellent beyond the Zika problem		202				1	There is no reason to prefer one potential baby over another, and contraception has added social benefits.		202				5	7	3	1	1	1	5	5	5	1	Indian	21	2	1	2	2	2
2017-01-12 19:38:59	2017-01-12 19:47:06	0	208.53.125.216	100	486	1	2017-01-12 19:47:07	R_1rl8wlV8AbLDE4K					48.035400390625	-122.81449890137	anonymous	4	6		I was concerned that there would still be pregnancies from improper use of the contraception.			101		4							4	3	2	1	1	1	5	2	2	2	American	60	6	1	2	1	3
2017-01-12 23:15:55	2017-01-12 23:23:27	0	75.76.61.38	100	452	1	2017-01-12 23:23:28	R_25XUo3PfF05widI					32.44709777832	-86.251998901367	anonymous	4	2	Preventing birth seems to have a higher probability of success.		148				4							2	2	3	2	1	1	5	4	5	1	USA	48	6	1	2	1	2
2017-01-12 23:04:09	2017-01-12 23:23:50	0	129.25.206.253	100	1180	1	2017-01-12 23:23:51	R_1H8d8qp9lxRTDYJ					39.959701538086	-75.196800231934	anonymous	4	6		IF equally effective, I believe it would be politically more accepted to kill mosquitos than to give out contraception in my country.			101		6		Same as before, as policymaker I believe it is politically more accepted to kill mosquitos than to give out contraception. Since contraception is taken by women voluntarily in any case, I do not think it is my business to judge whether Tanya or Thomas should be born.			101		6	6	6	6	6	3	2	2	2	1	German	26	6	2	2	2	3
2017-01-12 23:48:24	2017-01-12 23:54:58	0	201.46.198.120	100	394	1	2017-01-12 23:54:59	R_25tgesw5ZtlFb37					-22.902099609375	-43.130294799805	anonymous	4	7		Contraception should be a personal choice.			122		7		Again, because i think contraception is a private choice.			124		5	7	7	6	7	3	4	2	1	1	brazilian	28	6	2	1	1	3
2017-01-12 22:37:42	2017-01-13 01:20:28	0	187.20.124.90	100	9765	1	2017-01-13 01:20:29	R_bkKUgi1kfPm4eTD					-19.955307006836	-43.898803710938	anonymous	4	6		Because Contraception would impact negatively on the fertility rate (a result I have no information to deem desirable), while the repellent would have zero impact on it.			200		6		Because contraception not only often makes women postpone their pregnancy, it also impacts the aggregate number of babies born per cohort of women. This happens because, say, a woman that was inclined to having two babies ends up having only one, later in life, after the risk of zika has disappeared.			200		2	3	3	3	2	2	4	4	4	1	Brazilian	30	6	5	1	2	3
2017-01-13 02:48:24	2017-01-13 02:56:08	0	74.214.43.161	100	464	1	2017-01-13 02:56:09	R_12xTtpyjMm9vrlz					38.273300170898	-77.173896789551	anonymous	4	7		Contraceptives can be abortifacient, which goes against natural law morality.				1	7		Same as last answer				1	4	5	5	3	3	3	1	1	1	1	USA	33	6	2	2	1	1
2017-01-13 03:03:00	2017-01-13 03:49:00	0	142.116.9.58	100	2759	1	2017-01-13 03:49:01	R_1cTW6acPUovGIle					43.665496826172	-79.420402526855	anonymous	4	2	Contraception, taken correctly, seems a more likely plan than trying to prevent a mosquito bite in the tropics.		101				3	Because all things being equal, access to contraception is hugely important for many other socio-economic outcomes.		101				7	4	4	2	3	4	4	4	4	2	Canadian	49	5	2	2	2	2
2017-01-13 11:06:51	2017-01-13 11:14:05	0	72.211.180.116	100	433	1	2017-01-13 11:14:06	R_2eakYWazZIvqwB6					33.613494873047	-112.2333984375	anonymous	4	7		Contraception is intrinsically immoral because it contravenes natural law.				1	7		Contraception is intrinsically immoral because it contravenes natural law.				1	1	7	7	2	7	7	5	5	5	1	American	32	6	5	1	2	1
2017-01-13 08:04:24	2017-01-13 11:20:08	0	122.176.181.222	100	11744	1	2017-01-13 11:20:10	R_3gMipFFbUijr1mK					28.466705322266	77.033294677734	anonymous	4	5		Although I am pro-choice, I think prevention of spread of mosquitto population is more preferable.			110		5		Due to the same reason as stated before. Depopulation of vector carrying mosquito is more prefferable.			110		4	3	3	2	3	1	4	3	3	1	Indian	20	4	1	2	2	2
2017-01-13 12:32:26	2017-01-13 12:42:46	0	178.197.224.185	100	619	1	2017-01-13 12:42:48	R_29tgJ0cmygFCH39					47.144897460938	8.1551055908203	anonymous	4	7		It eliminates the cause of the illness and not the potentially ill person			1000	1	7						1	4	4	7	1	1	1	1	1	1	2	Swiss	52	6	5	2	2	1
2017-01-13 13:21:32	2017-01-13 13:29:35	0	2.122.28.118	100	483	1	2017-01-13 13:29:37	R_rroxHR4eDeSkly1					51.589904785156	0.014297485351562	anonymous	4	5		It interferes less with the right to reproduce			101		5		Again: it interferes less with human rights. But also it would avoid gaps in age range of population, which could be bad later on.			101		3	3	2	3	3	3	4	4	4	1	UK	32	6	3	2	2	1
2017-01-09 16:16:56	2017-01-13 17:52:43	0	67.225.30.195	100	351346	1	2017-01-13 17:52:44	R_2zCvjkJlby18890					50.415298461914	-104.61029815674	anonymous	4	6		I chose this because it is the least disruptive in the lives of humans and non-humans.			101		7		Mosquito repellent is less invasive for the normal human conception pattern.				1	6	6	6	2	2	2	2	1	2	2	Canadian	63	5	3	2	1	1
2017-01-13 21:27:00	2017-01-13 21:36:09	0	31.185.189.71	100	548	1	2017-01-13 21:36:10	R_3Ej0moDuorMAqJ5					55.830093383789	-4.2528991699219	anonymous	4	7		Repellent means there would be no need for people to delay pregnancies.			101		7		So as to not delay pregnancy.			541		6	6	6	2	2	2	5	2	2	1	British	27	5	4	2	1	2
2017-01-13 21:30:55	2017-01-13 21:37:00	0	83.92.102.121	100	364	1	2017-01-13 21:37:02	R_12yTEUyen7MCeDD					55.748992919922	12.546005249023	anonymous	4	4							4							2	3	3	3	3	3	4	4	4	1	Danish	29	6	4	1	2	2
2017-01-13 21:28:28	2017-01-13 21:41:28	0	92.19.81.234	100	780	1	2017-01-13 21:41:29	R_33yHDhYjFlfgESk					53.816696166992	-3.0500030517578	anonymous	4	4							4							3	7	6	1	2	2	2	2	2	2	British	43	6	3	1	2	2
2017-01-13 21:32:29	2017-01-13 21:46:48	0	104.157.104.239	100	858	1	2017-01-13 21:46:49	R_r3kRq66Ws51QcKJ					50.736206054688	-113.96949768066	anonymous	4	2	It is my perception that contraception is less harmful to the environment than mosquito repellent.		552				2	I have no preference over one child versus another because of the timing of when they were born.		553				4	5	6	1	1	1	4	1	1	1	Canadian	46	6	3	1	2	3
2017-01-13 22:33:01	2017-01-13 22:49:08	0	42.111.7.152	100	967	1	2017-01-13 22:49:13	R_tDIu167YPhVx40p					28.666702270508	77.216705322266	anonymous	4	7		I believe that on a longer duration having less Mosquitoes would ensure an overall healthier environment. While contraceptions would mean that people are still getting ill of that disease, therefore they have a lower utility than spray repellants. I also believe that one should not unnecessarily curtain life choices like having children when other means are possibe.			112		7		Mosquito repellants are more socially useful as they help mosquitoes stay away and therefore avoid sickness. Plus it allows freedom to have kids whenever you want.			119		4	2	2	5	2	2	4	4	4	1	Indian	21	5	3	2	1	3
2017-01-13 22:26:56	2017-01-13 23:15:37	0	67.241.77.156	100	2920	1	2017-01-13 23:15:38	R_1GBUrLIuTPpm8CD					42.407196044922	-76.515899658203	anonymous	4	5		Assuming it provided equal protection, it did not force women to delay having a child, an issue that might be relevant to some families.			110		5		Same reason I gave before			110		4	3	3	5	4	2	4	4	3	1	US	62	6	1	2	1	3
2017-01-13 23:34:45	2017-01-13 23:51:50	0	86.161.96.133	100	1024	1	2017-01-13 23:51:51	R_AEXA3XulTqkWEtX					51.550003051758	0.16670227050781	anonymous	4	7		Because the human element of contraception seems to make it less predictable than mosquito repellent.			101		4							4	3	3	4	3	3	2	2	2	1	English	53	6	5	2	1	2
2017-01-14 00:14:49	2017-01-14 00:31:08	0	151.224.19.146	100	979	1	2017-01-14 00:31:10	R_1hMAWInKy13CR9v					51.48030090332	-0.19929504394531	anonymous	4	6		Less intrusive than contraception			125		6		no baby is superior to the other, tanya and thomas are both equally deserving to be alive			125		5	6	3	3	3	2	2	2	2	2	French	30	6	5	1	2	3
2017-01-14 04:29:30	2017-01-14 04:41:17	0	189.121.182.99	100	707	1	2017-01-14 04:41:19	R_3QK6ZKU8bV3wtSF					-23.473297119141	-46.665802001953	anonymous	4	7		I chose to fund Mosquito repellent because it does not interfere with the lives of citizens as much as Contraception.			120		7		For the same reason as before.			120		3	3	3	1	1	1	5	5	5	1	brazilian	34	6	2	2	2	2
2017-01-14 04:47:02	2017-01-14 05:00:13	0	24.202.220.50	100	790	1	2017-01-14 05:00:14	R_3PvjpDXl8fPxoot					45.489700317383	-73.795799255371	anonymous	4	4							4							2	2	2	2	2	2	5	2	2	1	Canadian	40	6	3	2	1	2
2017-01-14 08:11:03	2017-01-14 08:23:59	0	109.228.190.42	100	775	1	2017-01-14 08:24:00	R_1poJtocU5xAsiPJ					59.850006103516	17.63330078125	anonymous	4	4							4							3	7	3	1	7	2	4	4	2	1	Swedish	35	6	2	1	1	2
2017-01-14 18:47:09	2017-01-14 19:02:05	0	86.146.196.92	100	896	1	2017-01-14 19:02:07	R_2xJzWgVEKavUJfm					51.533294677734	-0.10000610351562	anonymous	4	2	the chance of still being bitten by a mosquito far outweighs the delay in a countries growth caused by providing contraception		150				2	I am not bothered by the gender of the baby I just think that it would be better to delay and not have to use a repellent if possible		150				5	5	4	3	2	2	2	2	2	2	Australian/British	42	5	1	2	2	3
2017-01-14 01:11:33	2017-01-14 19:44:03	0	109.151.173.212	100	66750	1	2017-01-14 19:44:04	R_10DGIGAXxFRTPhk					52.071304321289	1.1443939208984	anonymous	4	7		Contraception limits people's reproductive choices, and does not factor in people who are unable, or choose not, to use it. It doesn't help vulnerable people, such as rape victims				1	7		Same answers as before				1	6	7	4	1	1	1	4	2	1	2	British	57	5	2	2	1	3
2017-01-14 20:11:29	2017-01-14 20:20:10	0	68.109.59.86	100	520	1	2017-01-14 20:20:11	R_3lAEQWqVqX5cfjQ					32.897506713867	-83.753601074219	anonymous	4	1	would target women who could become pregnant and allow them control over their bodies, as opposed to the repellant, which would cover everyone, regardless of possibility of becoming pregnant		101	1			1	I stick to the empowerment argument I articulated earlier; despite even the potentiality of different people existing in the future		101				2	6	3	7	6	2	4	4	3	1	American	30	6	1	2	1	1
2017-01-14 21:09:07	2017-01-14 21:21:24	0	191.179.28.188	100	737	1	2017-01-14 21:21:26	R_3nqPls1K3OlihDM					-29.833297729492	-51.149993896484	anonymous	4	2	Becuse a tend to belive that human error is more likely with he repellent.		149				2	Because is more reasonable to wait.		149	1			6	6	6	3	5	5	2	1	1	1	Brazilian	23	6	5	1	2	2
2017-01-14 23:41:26	2017-01-14 23:50:17	0	24.70.73.68	100	531	1	2017-01-14 23:50:19	R_pcvIXafGwwVHxzr					49.2998046875	-117.66889953613	anonymous	4	1	More effective.			1			1	More effective.			1			1	1	3	6	5	5	3	3	3	1	Canadian	25	5	4	1	2	1
2017-01-15 00:05:06	2017-01-15 00:13:39	0	45.72.237.2	100	513	1	2017-01-15 00:13:41	R_3DiF25Am4tDqMQV					43.696594238281	-79.412002563477	anonymous	4	2	Because these are tumultuous times.		101				4							5	5	5	3	2	3	2	1	1	3	White	24	6	3	2	2	3
2017-01-15 00:21:09	2017-01-15 00:31:09	0	115.113.11.140	100	600	1	2017-01-15 00:31:11	R_29ohw9AYGj6K0W2					12.983306884766	77.583312988281	anonymous	4	6		Thinking of the mosquito repellent in a way similar to bednets it provides a way to continue with life unchanged and seems to be an easier thing to adopt than to delay contraception during the months when zika virus is active.			375		4							4	2	6	4	2	1	4	4	4	1	Indian	40	6	1	2	2	3
2017-01-08 01:02:48	2017-01-08 01:03:18	0	74.79.11.58	10	29	0	2017-01-15 01:03:32	R_1n8y7zWb9f7IKzJ							anonymous	4	7
2017-01-08 01:02:55	2017-01-08 01:03:25	0	96.39.151.147	10	30	0	2017-01-15 01:03:32	R_27Ne7Iq2pB18jlX							anonymous	4	5
2017-01-08 01:02:59	2017-01-08 01:06:11	0	107.222.212.78	44	192	0	2017-01-15 01:06:21	R_3EMSIfz7LkVktkW							anonymous	4	4							4
2017-01-08 01:03:50	2017-01-08 01:08:18	0	71.168.94.214	29	267	0	2017-01-15 01:08:46	R_3D0wJn4O45Xluua							anonymous	4	5		Demanding women delay pregnancy limits their choices			201		5
2017-01-08 01:09:03	2017-01-08 01:09:10	0	172.56.13.101	2	6	0	2017-01-15 01:09:48	R_3jSRD2ne4geFeTc							anonymous	4
2017-01-08 01:09:45	2017-01-08 01:10:36	0	191.178.135.180	2	51	0	2017-01-15 01:11:12	R_3lXIW3nqCk9sV8C							anonymous	4
2017-01-08 01:08:22	2017-01-08 01:11:14	0	107.130.236.100	29	172	0	2017-01-15 01:11:17	R_2rjYXSUDapulKGh							anonymous	4	1	I'm thinking about the future children.		101				1
2017-01-08 01:04:51	2017-01-08 01:11:50	0	107.77.200.229	29	419	0	2017-01-15 01:12:31	R_XyRW6VLk1Slbv5D							anonymous	4	1	Safer to wait to solve Zika instead of taking a chance		101	1			1
2017-01-08 01:17:52	2017-01-08 01:18:27	0	82.35.235.181	2	34	0	2017-01-15 01:19:18	R_1jU5O7p1Da73U9Y							anonymous	4
2017-01-08 01:24:50	2017-01-08 01:24:57	0	73.227.130.24	2	7	0	2017-01-15 01:25:37	R_exL6vQ6qu0VHWb7							anonymous	4
2017-01-08 01:29:11	2017-01-08 01:30:02	0	216.211.40.7	10	51	0	2017-01-15 01:30:04	R_2EfQghV7OBkGuTR							anonymous	4	3
2017-01-08 01:36:17	2017-01-08 01:36:42	0	174.56.190.207	10	25	0	2017-01-15 01:37:14	R_2t1RYxqffLGRDTb							anonymous	4	1
2017-01-15 01:33:36	2017-01-15 01:46:15	0	174.95.13.249	100	759	1	2017-01-15 01:46:17	R_3Ra56Ip5vekmsaF					44.900100708008	-76.016098022461	anonymous	4	7		Making contraception available is one thing, enforcing its use is another			1000	1	7		Making contraception available is one thing, enforcing its use is another			1000	1	6	3	2	1	1	1	4	4	4	3	Canadian	51	4	3	2	2	1
2017-01-08 01:50:52	2017-01-08 01:51:20	0	75.87.248.216	10	27	0	2017-01-15 01:51:23	R_3EfEC47KXjhAdxw							anonymous	4	1
2017-01-08 01:53:23	2017-01-08 01:53:33	0	209.197.161.193	2	10	0	2017-01-15 01:54:10	R_bPEJe7i3SteE8BX							anonymous	4
2017-01-08 01:50:41	2017-01-08 01:55:25	0	216.15.38.172	29	283	0	2017-01-15 01:55:31	R_2S04tHe0Jzhn0nG							anonymous	4	6		It is external. Not something internal like contraception.			101		6
2017-01-08 01:57:48	2017-01-08 02:03:31	0	85.178.139.144	10	343	0	2017-01-15 02:04:01	R_Wpa4NEwqnP2wti1							anonymous	4	6
2017-01-08 02:03:58	2017-01-08 02:04:22	0	103.38.194.2	10	23	0	2017-01-15 02:05:16	R_1pAOSrax0GkmLeB							anonymous	4	6
2017-01-08 02:19:52	2017-01-08 02:20:06	0	14.100.134.47	2	14	0	2017-01-15 02:20:43	R_Aj1PlFqQl9Q50l3							anonymous	4
2017-01-08 02:27:22	2017-01-08 02:28:07	0	73.8.242.102	10	44	0	2017-01-15 02:28:18	R_6kVhlTNBab936h3							anonymous	4	7
2017-01-08 02:38:11	2017-01-08 02:38:25	0	172.56.17.41	2	14	0	2017-01-15 02:38:50	R_1pxTQGQehr3y2ND							anonymous	4
2017-01-08 02:19:05	2017-01-08 02:44:42	0	182.19.206.95	29	1536	0	2017-01-15 02:44:48	R_1CgqvuBp2TnogFM							anonymous	4	6		For all we know, the Zika virus may take a long time to recover from. Also, to limit the population growth and human freedom of the choice to reproduce is against free will (if it exist)			500		5
2017-01-08 03:20:18	2017-01-08 03:21:32	0	42.60.136.13	10	74	0	2017-01-15 03:22:11	R_1rlvRsF1gv0K8V0							anonymous	4	3
2017-01-08 03:21:28	2017-01-08 03:22:09	0	76.105.253.128	10	40	0	2017-01-15 03:22:13	R_sAx37RmFL0sfkuR							anonymous	4	5
2017-01-08 03:56:11	2017-01-08 03:56:21	0	99.3.61.98	2	10	0	2017-01-15 03:57:24	R_10NOPo6usCnYOcX							anonymous	4
2017-01-08 02:27:01	2017-01-08 03:58:07	0	123.243.151.5	29	5466	0	2017-01-15 03:59:02	R_2EcSd7angJpi5Ce							anonymous	4	5		Better to lessen the risk of babies being born with microcephaly than push women to not give birth at all			220		5
2017-01-08 04:09:50	2017-01-08 04:09:56	0	219.74.25.9	2	6	0	2017-01-15 04:10:29	R_tWFWIFaidPc3jHj							anonymous	4
2017-01-08 04:40:44	2017-01-08 04:42:18	0	98.113.237.16	13	94	0	2017-01-15 04:42:19	R_0IG0YNfrgbU5yzb							anonymous	4	2
2017-01-08 04:57:26	2017-01-08 05:03:30	0	24.154.91.160	68	363	0	2017-01-15 05:03:32	R_3PIwaZxu3HNCCLn							anonymous	4	3			101				4										3	2	2	4	4	4
2017-01-15 05:21:12	2017-01-15 06:06:10	0	103.18.72.106	100	2698	1	2017-01-15 06:06:11	R_1diWZDCNA9vg2Cq					28.666702270508	77.216705322266	anonymous	4	3	Mosquito repellant is riskier than using contraceptives. It is not fool-proof.		101				4							1	1	1	2	1	1	5	5	5	1	INDIAN	24	5	4	1	2	2
2017-01-08 06:36:55	2017-01-08 06:37:01	0	94.4.21.237	2	5	0	2017-01-15 06:37:16	R_26nEIOkJg88zYSO							anonymous	4
2017-01-15 06:28:17	2017-01-15 06:39:50	0	173.16.190.19	100	692	1	2017-01-15 06:39:52	R_aXmNHj4yTzzLLLr					41.56640625	-93.740501403809	anonymous	4	3	I don't want people having more babies.		122				2	There are already too many humans.		123				2	2	2	1	1	1	5	3	3	1	USA	41	5	1	2	2	3
2017-01-08 07:23:01	2017-01-08 07:24:01	0	220.255.108.44	10	59	0	2017-01-15 07:25:00	R_2S1OFZVUaV4dNgg							anonymous	4	7
2017-01-15 09:21:56	2017-01-15 09:31:53	0	1.144.97.35	100	596	1	2017-01-15 09:31:54	R_DrfI40MXERBTtXr					-33.783294677734	151.04998779297	anonymous	4	6		I believe in a woman's choice on whether she has children or not.			977	1	6		Same as before. A woman's right to decide her reproduction issues.			1000	1	7	7	7	3	6	4	4	4	4	1	Australian	58	6	1	2	1	2
2017-01-15 08:58:54	2017-01-15 10:15:46	0	2.29.252.244	100	4611	1	2017-01-15 10:15:47	R_1d6UBwSLOWz8smd					53.583297729492	-2.4333038330078	anonymous	4	4							4							7	6	2	3	3	1	4	1	1	1	British	40	6	1	2	1	3
2017-01-08 08:53:34	2017-01-08 11:19:34	0	219.74.25.9	2	8759	0	2017-01-15 11:19:39	R_2EA9PI1JEcyGlhd							anonymous	4
2017-01-15 12:13:43	2017-01-15 12:27:20	0	107.77.233.183	100	817	1	2017-01-15 12:27:22	R_ZCw9xVJYHiaswLL					33.748992919922	-84.388000488281	anonymous	4	2	Perhaps the repellent could have negative environmental consequences. Plus, people should just generally have access to contraception. There are many additional positive social, environmental and economic benefits to contraception.		1000	1			2	To me, there is no ethical dilemma over the identity of the baby that exists in the future. It is all a choice between life and nonlife, and I chose the option that potentially reduces the most potential harm to all possible players.		886	1			5	4	4	3	2	2	4	4	4	1	American	29	5	1	2	2	2
2017-01-08 13:02:06	2017-01-08 13:02:38	0	37.152.238.147	10	31	0	2017-01-15 13:02:44	R_tXtHb8yLmM0qlbz							anonymous	4	6
2017-01-08 13:01:54	2017-01-08 13:02:58	0	95.90.239.9	10	63	0	2017-01-15 13:03:11	R_26fJk6TRURqKaYZ							anonymous	4	7
2017-01-08 13:03:25	2017-01-08 13:03:52	0	73.17.89.174	2	26	0	2017-01-15 13:04:18	R_7OiXLhvyR14xefv							anonymous	4
2017-01-08 13:03:48	2017-01-08 13:04:58	0	111.82.34.184	10	69	0	2017-01-15 13:05:16	R_2171dmrLY9ylLXT							anonymous	4	1
2017-01-08 13:03:38	2017-01-08 13:04:55	0	121.214.130.30	10	77	0	2017-01-15 13:05:16	R_1Qi8jyw4f9dXeqP							anonymous	4	7
2017-01-08 13:05:13	2017-01-08 13:07:05	0	187.104.175.250	2	111	0	2017-01-15 13:07:07	R_2wgBVB9XBF2djjq							anonymous	4
2017-01-08 13:05:29	2017-01-08 13:07:16	0	78.56.128.97	10	107	0	2017-01-15 13:08:04	R_1jx4XjERAwvp8uX							anonymous	4	6
2017-01-08 13:06:37	2017-01-08 13:09:49	0	91.105.109.49	10	191	0	2017-01-15 13:10:00	R_BEpXJpVTxr6pfl7							anonymous	4	5
2017-01-08 13:10:40	2017-01-08 13:11:16	0	94.112.238.164	10	35	0	2017-01-15 13:11:17	R_2zjWNzIneqADz1F							anonymous	4	7
2017-01-08 13:08:11	2017-01-08 13:11:49	0	94.234.32.125	54	217	0	2017-01-15 13:12:06	R_27rMNhdOiQOS9x8							anonymous	4	4							4							2	7	2
2017-01-08 13:09:41	2017-01-08 13:11:55	0	175.35.50.242	29	134	0	2017-01-15 13:12:12	R_3haa1QKdPk8lGsK							anonymous	4	2			101				1
2017-01-08 13:12:08	2017-01-08 13:12:57	0	94.250.188.119	2	49	0	2017-01-15 13:13:01	R_1hYJkPudF0VCgIT							anonymous	4
2017-01-08 13:12:34	2017-01-08 13:12:42	0	73.163.166.37	2	8	0	2017-01-15 13:13:12	R_1FerN085EgxOxfp							anonymous	4
2017-01-08 13:05:17	2017-01-08 13:12:51	0	27.99.67.134	24	453	0	2017-01-15 13:13:14	R_4SBiZ5EndfSq8QF							anonymous	4	6					101
2017-01-08 13:11:35	2017-01-08 13:14:45	0	50.254.92.19	10	190	0	2017-01-15 13:15:15	R_2R82ZXpJ7dPlMeJ							anonymous	4	1
2017-01-08 13:13:15	2017-01-08 13:15:37	0	91.123.147.58	10	141	0	2017-01-15 13:16:08	R_1JEgegd530D1qEI							anonymous	4	6
2017-01-08 13:14:42	2017-01-08 13:16:17	0	77.99.17.2	2	95	0	2017-01-15 13:16:20	R_2V1KCgtl5FZWNJ5							anonymous	4
2017-01-08 13:13:15	2017-01-08 13:17:11	0	77.234.253.46	10	236	0	2017-01-15 13:17:13	R_ALpm7jgmwgmvLBT							anonymous	4	7
2017-01-08 13:14:36	2017-01-08 13:19:12	0	220.253.70.196	29	275	0	2017-01-15 13:19:17	R_1mrBYXCLTXTSwSj							anonymous	4	7		Because it can help already pregnant women and those wishing to start a family.			500		7
2017-01-08 13:18:20	2017-01-08 13:21:03	0	176.103.72.53	10	163	0	2017-01-15 13:21:25	R_294y80Tx7NS3GRL							anonymous	4	6
2017-01-08 13:19:47	2017-01-08 13:20:50	0	76.108.193.77	10	62	0	2017-01-15 13:21:32	R_1H7tABFROhMNccG							anonymous	4	2
2017-01-08 13:20:01	2017-01-08 13:21:15	0	86.168.55.136	10	73	0	2017-01-15 13:21:37	R_2dzG2e4wLJKfgvC							anonymous	4	3
2017-01-08 13:19:17	2017-01-08 13:22:36	0	84.192.187.60	44	199	0	2017-01-15 13:22:42	R_2Vg7LJNS17Ik7QI							anonymous	4	4							4
2017-01-08 13:22:08	2017-01-08 13:22:27	0	1.36.214.33	2	19	0	2017-01-15 13:23:18	R_2rPcDGsdtf6S7y4							anonymous	4
2017-01-08 13:23:35	2017-01-08 13:23:45	0	83.58.192.89	2	10	0	2017-01-15 13:23:57	R_2tDWE4LQGF8W72z							anonymous	4
2017-01-08 13:23:49	2017-01-08 13:25:44	0	72.185.199.131	24	114	0	2017-01-15 13:25:49	R_21FFvSQT6sCtkWs							anonymous	4	3	It allows women to control their bodies			1
2017-01-08 13:25:59	2017-01-08 13:27:30	0	93.220.68.229	10	90	0	2017-01-15 13:27:33	R_781Czpc83evQqn7							anonymous	4	1
2017-01-08 13:24:45	2017-01-08 13:27:33	0	94.204.244.84	2	167	0	2017-01-15 13:27:35	R_1mPNCSLjSFmShOd							anonymous	4
2017-01-08 13:25:01	2017-01-08 13:28:05	0	67.175.5.181	24	183	0	2017-01-15 13:28:49	R_cvyQNtL9QcqqOMp							anonymous	4	1	It seemed more reliable and more directly addressed to the problem of microcephalic babies.		101
2017-01-08 13:30:30	2017-01-08 13:30:43	0	108.210.204.235	2	13	0	2017-01-15 13:31:39	R_3Qr0HVcfscHXPUt							anonymous	4
2017-01-08 13:28:36	2017-01-08 13:32:10	0	213.250.20.77	10	214	0	2017-01-15 13:32:40	R_w0oLfUYFOicS89P							anonymous	4	7
2017-01-08 13:28:32	2017-01-08 13:32:18	0	88.160.37.40	29	225	0	2017-01-15 13:33:10	R_3OfyaWeLR5ZhcHA							anonymous	4	1	Because there are other wider benefits to women's health and access to education when not pregnant or raising children			1			1
2017-01-08 13:08:45	2017-01-08 13:33:45	0	183.90.36.13	24	1499	0	2017-01-15 13:33:51	R_25AZY8Kc8hO4dRj							anonymous	4	4
2017-01-08 13:14:18	2017-01-08 13:33:13	0	209.58.128.176	44	1134	0	2017-01-15 13:34:01	R_XsPfcyf5BGNWr0B							anonymous	4	5		contraception is often hormonal and has many side effects - i believe these would be more emotionally severe than mosquito repellent side effects			149		5		contraception is usually hormonal and has emotional side effects that repellent does not - I do not want women to have to deal with these side effects.			185
2017-01-08 13:31:11	2017-01-08 13:34:05	0	194.255.146.30	10	173	0	2017-01-15 13:34:43	R_24ORFRXQMmQZe0c							anonymous	4	1
2017-01-08 13:12:25	2017-01-08 13:40:07	0	198.13.192.239	29	1662	0	2017-01-15 13:40:59	R_1LCMTqsmyPxAoEU							anonymous	4	4							5
2017-01-08 13:42:44	2017-01-08 13:43:11	0	72.200.208.40	10	26	0	2017-01-15 13:43:42	R_3Dtfb00LE8eZeYf							anonymous	4	1
2017-01-08 13:44:04	2017-01-08 13:44:37	0	46.199.62.93	2	33	0	2017-01-15 13:45:03	R_1qfT1h21HGb70AM							anonymous	4
2017-01-08 13:44:59	2017-01-08 13:47:55	0	5.173.7.212	24	175	0	2017-01-15 13:48:20	R_27TlufQbEewwno0							anonymous	4	3	It has more than one function, you get more service for the price.		101
2017-01-08 13:44:49	2017-01-08 13:49:42	0	80.215.167.46	44	292	0	2017-01-15 13:50:19	R_24C5IiWswrrcKx4							anonymous	4	5					215		5					206
2017-01-08 13:50:16	2017-01-08 13:50:26	0	82.72.253.199	2	9	0	2017-01-15 13:50:29	R_3OfaRs4DIcF1x41							anonymous	4
2017-01-08 13:47:33	2017-01-08 13:50:25	0	182.55.175.81	2	172	0	2017-01-15 13:51:19	R_3GBt3X6JGBFys8f							anonymous	4
2017-01-08 13:51:28	2017-01-08 13:54:17	0	78.61.242.226	10	168	0	2017-01-15 13:54:31	R_3My3JTB43HBS5x3							anonymous	4	6
2017-01-08 13:52:35	2017-01-08 13:55:18	0	213.83.153.87	24	162	0	2017-01-15 13:55:35	R_DiQpdFMzuOxs61b							anonymous	4	6					101
2017-01-08 13:46:47	2017-01-08 13:55:17	0	112.198.102.252	44	509	0	2017-01-15 13:55:42	R_XAQg7ryx8RduXHX							anonymous	4	7		Better to limit the number of infections before hand			360		6		Postponing child birth will have its own unintended consequences.			262
2017-01-08 13:55:41	2017-01-08 13:56:28	0	47.18.161.60	2	46	0	2017-01-15 13:56:35	R_3qdNYdvKMdhtnOK							anonymous	4
2017-01-08 13:42:54	2017-01-08 13:57:35	0	101.14.176.91	29	881	0	2017-01-15 13:57:38	R_yO4JKIereX3sxVf							anonymous	4	7		Reproduction is time-sensitive, people who want to grow their families should be able to do so whenever			301		7
2017-01-08 13:12:07	2017-01-08 13:17:20	0	88.217.180.105	44	313	0	2017-01-15 14:01:35	R_cYETEAZAFclzSvP							anonymous	4	7						1	7						1
2017-01-08 13:18:30	2017-01-08 14:01:39	0	59.189.57.213	10	2588	0	2017-01-15 14:01:44	R_1mQlSCUIAs0ob5c							anonymous	4	2
2017-01-08 13:53:28	2017-01-08 14:02:30	0	98.5.80.102	29	541	0	2017-01-15 14:02:57	R_2YonPzkWhBm3PNV							anonymous	4	1	Gives women more choices, is well-tested and effective; seem less likely to fail		190	1			1
2017-01-08 14:03:17	2017-01-08 14:03:22	0	99.7.113.66	2	4	0	2017-01-15 14:03:26	R_baxb69w6DIjMrRv							anonymous	4
2017-01-08 13:59:41	2017-01-08 14:02:28	0	24.145.203.84	68	166	0	2017-01-15 14:03:26	R_3EyDULhRJ48g3I9							anonymous	4	4							4							7	1	2	7	7	2
2017-01-08 13:58:43	2017-01-08 14:05:50	0	95.96.69.216	29	427	0	2017-01-15 14:06:04	R_O0zPdVh20AytT7b							anonymous	4	2	Contraception encourages better and more educated sexual decisions and awareness.		101	1			3
2017-01-08 14:07:38	2017-01-08 14:09:15	0	188.27.180.194	2	96	0	2017-01-15 14:09:16	R_21EQRdUzypvzoGk							anonymous	4
2017-01-08 14:11:19	2017-01-08 14:11:56	0	213.205.252.168	10	36	0	2017-01-15 14:12:17	R_3rIEGgZzsCE8xW1							anonymous	4	7
2017-01-08 14:13:40	2017-01-08 14:14:27	0	24.246.1.134	10	47	0	2017-01-15 14:14:42	R_sXMBiNqNTgY7MjL							anonymous	4	1
2017-01-08 14:14:43	2017-01-08 14:16:55	0	109.175.100.252	10	132	0	2017-01-15 14:17:00	R_31uqHgoUAih7p1d							anonymous	4	6
2017-01-08 14:12:47	2017-01-08 14:17:45	0	80.4.10.41	59	298	0	2017-01-15 14:17:47	R_1JKLNGfLPY2a5Yr							anonymous	4	3	Because there is always a risk if there is a pregnancy. No pregnancy =no problem. Plus the world is overpopulated as it is.		110				4										6	6	6
2017-01-08 14:20:52	2017-01-08 14:21:27	0	188.174.185.79	2	34	0	2017-01-15 14:21:40	R_3Lcecjk9hlJD7Dy							anonymous	4
2017-01-15 13:32:43	2017-01-15 14:21:49	0	117.206.98.58	100	2946	1	2017-01-15 14:21:51	R_rlnsAVxwECncrHH					11.466705322266	77.450012207031	anonymous	4	1	Population explosion. One cannot rely on mosquito repellents all the time. We may not if we have contracted the virus. But if we choose to delay pregnancy, we will be more safe.		501	1			1	Same answer. Also, I think I'm okay with a different baby. Prevention is better than cure.		502	1			7	7	7	7	1	4	5	4	5	1	Indian	21	5	1	1	2	2
2017-01-08 14:19:43	2017-01-08 14:21:42	0	178.221.182.194	10	118	0	2017-01-15 14:21:53	R_308lJnvTaVmgs3Q							anonymous	4	3
2017-01-08 14:22:23	2017-01-08 14:22:47	0	46.246.16.123	2	24	0	2017-01-15 14:22:54	R_2wEmKIeG8wcd59F							anonymous	4
2017-01-08 14:22:23	2017-01-08 14:24:40	0	73.18.180.248	24	136	0	2017-01-15 14:24:57	R_1OHoZL38N2oA95p							anonymous	4	6					243
2017-01-08 14:15:38	2017-01-08 14:24:55	0	77.22.254.45	63	557	0	2017-01-15 14:24:58	R_6gmPBvqLRHy80JH							anonymous	4	5		In case of failed contraception efforts + that way women can get pregnant even when zika is strong			150		5		Same reasons as stated before. Contraception efforts may fail + mosquito repellent allows for pregnancies during zika periods			150		2	2	3				4	4	2
2017-01-08 14:25:03	2017-01-08 14:28:05	0	104.136.48.164	44	181	0	2017-01-15 14:28:23	R_pEjD0nnpkLL1iTL							anonymous	4	6		protects both the mother and child, rather than just the child			206		4
2017-01-08 14:25:45	2017-01-08 14:28:16	0	202.156.127.233	44	151	0	2017-01-15 14:28:43	R_TelgBUWQbN2mOit							anonymous	4	4							4
2017-01-08 14:27:20	2017-01-08 14:29:26	0	180.190.82.72	10	126	0	2017-01-15 14:29:47	R_1qTXNQHBtqRqONt							anonymous	4	6
2017-01-08 14:28:20	2017-01-08 14:29:47	0	80.3.166.84	2	87	0	2017-01-15 14:29:59	R_2chK18F1b6okEms							anonymous	4
2017-01-08 14:28:51	2017-01-08 14:30:16	0	82.181.189.190	10	85	0	2017-01-15 14:30:32	R_2WvxpinF86xDjTh							anonymous	4	2
2017-01-08 14:30:44	2017-01-08 14:31:44	0	121.44.171.41	10	59	0	2017-01-15 14:31:51	R_2pJeKthScB90tRC							anonymous	4	2
2017-01-08 14:30:33	2017-01-08 14:31:46	0	49.191.146.211	24	72	0	2017-01-15 14:32:05	R_24Dd0K7zu0PGW5M							anonymous	4	1			694	1
2017-01-08 14:30:51	2017-01-08 14:32:13	0	82.73.185.22	10	81	0	2017-01-15 14:32:15	R_2eahEaJja0wgTNS							anonymous	4	6
2017-01-08 14:32:17	2017-01-08 14:33:30	0	107.77.223.136	10	72	0	2017-01-15 14:33:34	R_3KPWEMRKhHXuaDl							anonymous	4	3
2017-01-08 14:34:13	2017-01-08 14:37:19	0	88.111.73.190	10	186	0	2017-01-15 14:38:00	R_3DwnjfMmTossDM8							anonymous	4	1
2017-01-08 14:38:43	2017-01-08 14:42:07	0	99.122.48.124	10	204	0	2017-01-15 14:42:13	R_ZeMKo8YNJsZsUpP							anonymous	4	1
2017-01-08 14:42:58	2017-01-08 14:43:57	0	180.191.130.26	10	58	0	2017-01-15 14:44:17	R_1reo7oMRcBqKhtL							anonymous	4	6
2017-01-08 14:42:13	2017-01-08 14:43:54	0	213.48.64.2	24	100	0	2017-01-15 14:44:32	R_3QWUb0Id9Zwi0wg							anonymous	4	4
2017-01-08 14:44:53	2017-01-08 14:45:25	0	31.217.77.234	2	31	0	2017-01-15 14:45:27	R_24OVULZUFNIlMs3							anonymous	4
2017-01-08 14:44:01	2017-01-08 14:46:15	0	94.22.114.179	44	133	0	2017-01-15 14:46:31	R_1P5h26Hk0CiajS0							anonymous	4	4							4
2017-01-08 14:42:14	2017-01-08 14:51:59	0	87.212.151.49	44	584	0	2017-01-15 14:52:33	R_yvGlxbLqZlSKmGZ							anonymous	4	2	If truly equally effective as a method, I would prefer not to kill mosquitos while builing their resistance to the repellent		200				2	Same reason as before, I don't mind the effect just discribed		200
2017-01-08 13:02:36	2017-01-08 14:58:29	0	94.214.151.131	10	6952	0	2017-01-15 14:58:46	R_1LbWBVuVxEifyL6							anonymous	4	1
2017-01-08 14:55:30	2017-01-08 15:00:12	0	50.46.205.246	29	282	0	2017-01-15 15:00:26	R_1pQIeMVb9OBjk3u							anonymous	4	2	less toxic, easier to control		266				1
2017-01-08 14:58:04	2017-01-08 15:01:10	0	50.5.53.119	63	186	0	2017-01-15 15:01:15	R_2E5eYgpt8EKAyqy							anonymous	4	4							4							6	2	2				2	2	2
2017-01-08 14:20:22	2017-01-08 14:21:03	0	82.128.184.142	2	41	0	2017-01-15 15:01:17	R_1CcxWMkPeYJ7XLv							anonymous	4
2017-01-08 13:15:39	2017-01-08 14:12:05	0	80.85.85.223	13	3386	0	2017-01-15 15:01:21	R_4VeZunE3oChtNsh							anonymous	4	2
2017-01-08 14:47:13	2017-01-08 14:48:06	0	112.198.102.62	2	53	0	2017-01-15 15:01:23	R_8o9rRfdd6c0o2UJ							anonymous	4
2017-01-08 14:59:00	2017-01-08 15:01:23	0	160.176.186.29	2	143	0	2017-01-15 15:02:10	R_3kup70c6n3e9mJG							anonymous	4
2017-01-08 15:01:36	2017-01-08 15:01:51	0	90.196.5.241	2	15	0	2017-01-15 15:02:21	R_3qO1k8SSwScQTsy							anonymous	4
2017-01-08 15:02:00	2017-01-08 15:02:58	0	74.70.164.177	10	57	0	2017-01-15 15:03:05	R_1g7Pt3u7t2KwAp7							anonymous	4	1
2017-01-08 15:03:23	2017-01-08 15:03:59	0	147.147.202.95	2	36	0	2017-01-15 15:04:02	R_29msQVQ9G7NyWJv							anonymous	4
2017-01-08 15:05:35	2017-01-08 15:07:26	0	220.255.100.127	10	110	0	2017-01-15 15:08:13	R_2U0fsj0meUbLiys							anonymous	4	5
2017-01-08 15:08:18	2017-01-08 15:09:22	0	97.96.52.140	10	63	0	2017-01-15 15:09:44	R_yEjjTnmbKLFhOmd							anonymous	4	6
2017-01-08 15:10:02	2017-01-08 15:11:23	0	213.205.251.73	10	81	0	2017-01-15 15:12:08	R_3foWsVi7d3wqC3P							anonymous	4	6
2017-01-08 15:15:22	2017-01-08 15:15:42	0	81.25.53.42	2	19	0	2017-01-15 15:16:21	R_26lh2iyTI47RQOf							anonymous	4
2017-01-08 15:15:29	2017-01-08 15:18:56	0	146.90.198.44	29	207	0	2017-01-15 15:19:33	R_24uDJKiolS40roG							anonymous	4	1	prevents the problem at source, also non-toxic		369	1			2
2017-01-08 15:18:49	2017-01-08 15:19:18	0	88.9.45.85	2	28	0	2017-01-15 15:19:58	R_2aM3GlggsBsEbrk							anonymous	4
2017-01-08 15:20:15	2017-01-08 15:21:07	0	216.197.185.193	10	51	0	2017-01-15 15:21:39	R_3oBIWLTWZFRU496							anonymous	4	5
2017-01-08 15:21:50	2017-01-08 15:22:16	0	174.141.206.59	10	25	0	2017-01-15 15:22:21	R_9nIc7NnhpFbRvhf							anonymous	4	7
2017-01-08 15:22:14	2017-01-08 15:23:11	0	95.20.238.100	10	56	0	2017-01-15 15:23:27	R_1FgCnASv213VIb0							anonymous	4	2
2017-01-08 15:12:56	2017-01-08 15:23:06	0	68.49.163.146	29	609	0	2017-01-15 15:23:54	R_3IVJnDREAx0TirI							anonymous	4	7		It allows women to get pregnant if they wish. I'm assuming women have a full array of birth control methods from which to choose or abstain as they prefer.			557	1	7
2017-01-08 15:26:35	2017-01-08 15:26:48	0	65.92.244.76	2	13	0	2017-01-15 15:27:12	R_3sc7OBUXpkrbcS8							anonymous	4
2017-01-08 15:19:52	2017-01-08 15:26:51	0	2.232.192.255	29	418	0	2017-01-15 15:27:18	R_896Wh0uvdvYFNWF							anonymous	4	6		selfdetermination comes first if methos equaly effective			101		6
2017-01-08 15:28:48	2017-01-08 15:29:52	0	98.235.61.126	10	64	0	2017-01-15 15:30:20	R_ONHLKjYxJqnxYel							anonymous	4	1
2017-01-08 15:29:34	2017-01-08 15:31:18	0	62.48.213.246	44	103	0	2017-01-15 15:31:25	R_2YnqJwsgek0EGNP							anonymous	4	4							4
2017-01-08 15:25:23	2017-01-08 15:32:04	0	176.149.227.145	24	400	0	2017-01-15 15:32:21	R_32Wl03JQH9dt40X							anonymous	4	5		Is mosquito repellent is equally effective there's no reason to prevent those who want children from having them			105
2017-01-08 15:31:59	2017-01-08 15:32:05	0	106.51.27.184	2	6	0	2017-01-15 15:32:28	R_1cSyzZVMRZjo1JA							anonymous	4
2017-01-08 15:31:22	2017-01-08 15:33:09	0	75.70.17.118	10	106	0	2017-01-15 15:33:33	R_27qUTYfAm9cy3LA							anonymous	4	1
2017-01-08 15:35:16	2017-01-08 15:36:22	0	89.100.11.168	10	65	0	2017-01-15 15:36:48	R_3nCUPY4Kpfh8yk1							anonymous	4	1
2017-01-08 14:22:01	2017-01-08 15:36:15	0	186.50.4.9	10	4454	0	2017-01-15 15:36:58	R_2VfkdTVModajedd							anonymous	4	7
2017-01-08 15:39:33	2017-01-08 15:40:50	0	92.29.152.197	2	77	0	2017-01-15 15:41:09	R_2QrfaJqlxoZZ6Qx							anonymous	4
2017-01-15 15:38:08	2017-01-15 15:48:29	0	73.221.129.152	100	620	1	2017-01-15 15:48:30	R_11d0qRANLlvLKDC					46.986694335938	-122.7407989502	anonymous	4	4							4							5	3	4	1	1	2	3	3	3	2	American	56	5	1	2	2	3
2017-01-08 15:44:18	2017-01-08 15:50:58	0	174.193.138.206	44	399	0	2017-01-15 15:51:51	R_3NCm1EzXOXE7JOY							anonymous	4	1	Repellant unreliable		976	1			1	Repellant unreliable			1
2017-01-08 15:51:42	2017-01-08 15:52:31	0	130.193.221.146	10	48	0	2017-01-15 15:52:42	R_SBlaTNEk1goil3j							anonymous	4	2
2017-01-08 15:38:59	2017-01-08 15:57:54	0	14.195.233.220	2	1134	0	2017-01-15 15:58:00	R_1JRYYwYIgBuT7ZM							anonymous	4
2017-01-08 15:56:22	2017-01-08 15:57:49	0	194.96.43.184	44	86	0	2017-01-15 15:58:17	R_2ePytkjgyFpVgAm							anonymous	4	4							4
2017-01-08 15:41:21	2017-01-08 16:01:36	0	174.16.7.137	13	1215	0	2017-01-15 16:01:49	R_1SK8ylQeyQT5Fzv							anonymous	4	1
2017-01-08 16:02:14	2017-01-08 16:02:40	0	86.173.143.167	2	26	0	2017-01-15 16:02:42	R_3oBEKV8GCbo6kaQ							anonymous	4
2017-01-08 15:58:20	2017-01-08 16:03:14	0	73.153.172.14	29	293	0	2017-01-15 16:03:30	R_3MnFT7br1fivhKx							anonymous	4	1	There's a chance that they might continue contraception and skip having expensive babies. It might also be the only way for them to get contraception in the first place.		202				1
2017-01-08 16:07:40	2017-01-08 16:09:11	0	114.75.77.27	10	90	0	2017-01-15 16:09:52	R_2VsdYkX4Tjjta5o							anonymous	4	6
2017-01-08 16:03:46	2017-01-08 16:12:24	0	193.212.197.67	10	517	0	2017-01-15 16:12:45	R_1oh70aUziXOGQU3							anonymous	4	7
2017-01-08 16:13:20	2017-01-08 16:13:57	0	24.124.87.77	10	37	0	2017-01-15 16:14:03	R_3MQ02KoqMfdTklt							anonymous	4	5
2017-01-08 16:14:17	2017-01-08 16:15:49	0	80.71.141.102	10	92	0	2017-01-15 16:16:17	R_1QJxAO4J8aQqLOy							anonymous	4	1
2017-01-08 13:14:17	2017-01-08 16:17:09	0	41.169.47.110	63	10972	0	2017-01-15 16:17:23	R_1NntYMLCggw1zAQ							anonymous	4	7		I value life			1000	1	7					1000	1	2	7	7				1	1	1
2017-01-08 16:17:04	2017-01-08 16:17:42	0	89.205.104.164	2	38	0	2017-01-15 16:17:47	R_2TL7uUBa1KpOP8I							anonymous	4
2017-01-08 13:55:50	2017-01-08 16:20:34	0	97.113.122.243	2	8683	0	2017-01-15 16:21:01	R_3jTIMITRPESQyJj							anonymous	4
2017-01-08 16:19:22	2017-01-08 16:20:49	0	92.52.26.42	10	87	0	2017-01-15 16:21:34	R_1n3JhgfjY34umEW							anonymous	4	5
2017-01-08 16:20:46	2017-01-08 16:23:36	0	76.109.210.229	10	170	0	2017-01-15 16:23:43	R_1PZgRWx0TkzyOf9							anonymous	4	1
2017-01-08 16:21:04	2017-01-08 16:28:35	0	70.211.64.211	29	451	0	2017-01-15 16:29:13	R_31Gko7K3k9wLWKx							anonymous	4	1	Human contraception, for any reason, tremendously benefits the planet.			1			1
2017-01-08 16:36:15	2017-01-08 16:37:03	0	172.58.23.146	10	47	0	2017-01-15 16:37:44	R_Pu0JYZlcgGqNSvv							anonymous	4	1
2017-01-08 16:35:55	2017-01-08 16:37:58	0	67.162.159.51	10	123	0	2017-01-15 16:38:07	R_ZaYiU7RPflpwVpL							anonymous	4	1
2017-01-08 16:27:13	2017-01-08 16:38:07	0	69.127.156.229	29	653	0	2017-01-15 16:38:14	R_1Ok9gfZlItiPKp0							anonymous	4	7		It protects men and children, too. I also don't believe governments should be involved in contraception decisions.				1	7
2017-01-08 16:38:50	2017-01-08 16:40:38	0	73.178.82.175	10	108	0	2017-01-15 16:40:40	R_2dW0stC40mWErDI							anonymous	4	2
2017-01-08 16:40:52	2017-01-08 16:42:11	0	81.25.16.82	10	78	0	2017-01-15 16:42:44	R_2tJBR0OluX9zH7I							anonymous	4	6
2017-01-08 16:35:35	2017-01-08 16:42:08	0	174.28.113.142	44	393	0	2017-01-15 16:42:44	R_28TZVNrmONWDF6J							anonymous	4	1	Contraception leads to a host of benefits in economy, environment, and the well being of individuals. Also, it is the safest and most guarunteed manner of avoiding microcephaly		1000	1			1	A higher chance of avoiding microcephaly			1
2017-01-08 16:41:48	2017-01-08 16:43:37	0	109.157.119.104	2	109	0	2017-01-15 16:43:48	R_2EBtHDMUnnudxPp							anonymous	4
2017-01-08 16:40:51	2017-01-08 16:44:22	0	67.162.159.51	29	211	0	2017-01-15 16:44:37	R_3EFG1pXXqbCBB7W							anonymous	4	1	Contraception should alreafy have been provided as a public-health service.		1000	1			1
2017-01-08 16:44:51	2017-01-08 16:47:04	0	174.59.24.120	10	133	0	2017-01-15 16:47:10	R_3nlpY832xqhDnq1							anonymous	4	2
2017-01-08 16:51:18	2017-01-08 16:52:25	0	77.77.236.145	10	66	0	2017-01-15 16:52:34	R_1dn8fuo5HiuQXZI							anonymous	4	2
2017-01-08 16:43:47	2017-01-08 16:52:23	0	92.15.228.208	10	515	0	2017-01-15 16:53:18	R_2xREwXRVxlUI2bb							anonymous	4	6
2017-01-08 16:52:23	2017-01-08 16:55:14	0	172.56.20.193	44	171	0	2017-01-15 16:55:33	R_9N2QZCT5dpRIwGl							anonymous	4	1	Would work better			1			1	Would be better overall			1
2017-01-08 16:55:44	2017-01-08 16:58:17	0	178.118.248.131	24	152	0	2017-01-15 16:58:48	R_BJUhPHhXTg6n7X3							anonymous	4	2			101	1
2017-01-08 17:00:18	2017-01-08 17:01:57	0	99.21.105.246	10	98	0	2017-01-15 17:02:52	R_29m3XiCgCllEQxl							anonymous	4	6
2017-01-08 17:04:07	2017-01-08 17:04:37	0	66.87.140.52	24	30	0	2017-01-15 17:04:59	R_21cW5D0HaxXHlAR							anonymous	4	4
2017-01-08 16:47:55	2017-01-08 17:06:27	0	24.86.154.153	10	1112	0	2017-01-15 17:07:02	R_2UarjUpmYGGdR3I							anonymous	4	1
2017-01-08 16:35:32	2017-01-08 17:07:51	0	88.193.95.102	2	1939	0	2017-01-15 17:08:07	R_1dv5tqYfdqNyE2T							anonymous	4
2017-01-08 17:10:00	2017-01-08 17:12:20	0	2.238.38.40	10	140	0	2017-01-15 17:12:21	R_3ew5aAXLWindFHu							anonymous	4	3
2017-01-08 17:12:01	2017-01-08 17:13:02	0	184.64.141.185	24	60	0	2017-01-15 17:13:20	R_1LwaGw6QdTLAqCE							anonymous	4	4
2017-01-08 17:16:22	2017-01-08 17:17:33	0	70.75.27.11	10	70	0	2017-01-15 17:17:48	R_1i27I65PfI22Tcm							anonymous	4	7
2017-01-08 17:13:23	2017-01-08 17:18:15	0	75.154.242.203	44	291	0	2017-01-15 17:18:22	R_2RQvgQ3AJKr9LE4							anonymous	4	3	Safer, don't trust repellent to block virus, and repellent toxic -what about inbred infertility for mosquitoes?		195				3	Safer - less chemicals - and provides contraception to those who want it		209
2017-01-08 17:14:03	2017-01-08 17:19:41	0	24.135.53.4	2	338	0	2017-01-15 17:19:51	R_2OGQ1z0FBNyP9yG							anonymous	4
2017-01-08 17:20:18	2017-01-08 17:21:46	0	217.120.66.184	10	88	0	2017-01-15 17:22:32	R_We2WPGZwdO7BxDj							anonymous	4	2
2017-01-08 17:23:38	2017-01-08 17:24:29	0	201.27.40.120	10	50	0	2017-01-15 17:24:31	R_b2zDotebHaOwShX							anonymous	4	2
2017-01-08 17:26:51	2017-01-08 17:28:40	0	24.10.197.9	10	108	0	2017-01-15 17:28:57	R_1q20s9lZX6Z7aB0							anonymous	4	1
2017-01-08 16:59:34	2017-01-08 17:31:28	0	83.250.202.185	10	1913	0	2017-01-15 17:32:08	R_1TXagT0yAM0hXRn							anonymous	4	5
2017-01-08 17:19:43	2017-01-08 17:31:41	0	1.22.245.61	44	718	0	2017-01-15 17:32:09	R_WBcP6SWvUyUzdHb							anonymous	4	6		it's better to prevent the carriers of Zika than to infringe with the reproductive rights of people			101	1	6						1
2017-01-08 16:55:59	2017-01-08 17:32:15	0	123.193.228.247	29	2176	0	2017-01-15 17:32:27	R_1JXFsqjOU0iVo6Y							anonymous	4	3	It would be a short-term mothod. Mosquito repellent is surely the key action for solving the problem but it takes time.		1000				6
2017-01-08 15:13:26	2017-01-08 17:33:08	0	66.87.124.21	10	8381	0	2017-01-15 17:33:14	R_3qJ6XsMSkxEXpPX							anonymous	4	7
2017-01-08 17:30:03	2017-01-08 17:40:31	0	79.122.32.91	44	627	0	2017-01-15 17:40:43	R_3h0JPyIyHYc4VYA							anonymous	4	1	responsible behavior			1			1	birth and death follow natural laws			1
2017-01-08 17:36:12	2017-01-08 17:42:36	0	104.33.98.114	29	383	0	2017-01-15 17:42:54	R_ypDHC0yBxSvXyzT							anonymous	4	6		There would be no need to delay pregnancies if mosquito repellent is as effective			101		6
2017-01-08 17:45:30	2017-01-08 17:46:00	0	73.134.197.194	2	30	0	2017-01-15 17:46:03	R_PXuQthHCxrr1UAN							anonymous	4
2017-01-08 17:48:10	2017-01-08 17:49:55	0	50.254.36.150	10	105	0	2017-01-15 17:50:18	R_2arI9lczSkenV9y							anonymous	4	6
2017-01-08 17:46:08	2017-01-08 17:50:36	0	195.174.156.51	24	268	0	2017-01-15 17:51:09	R_9pgPznmhc5TeGfD							anonymous	4	2	we are already over-populated.		101
2017-01-08 17:53:26	2017-01-08 17:53:45	0	86.130.98.241	2	18	0	2017-01-15 17:54:04	R_3D0mRlRXQ598NKT							anonymous	4
2017-01-08 17:51:53	2017-01-08 17:54:18	0	62.44.134.196	10	145	0	2017-01-15 17:54:30	R_1FsVpLPHjsJg33T							anonymous	4	6
2017-01-08 18:01:05	2017-01-08 18:01:58	0	39.44.243.165	2	52	0	2017-01-15 18:02:47	R_1Qc2nvFpj7Cp9Sf							anonymous	4
2017-01-08 18:06:23	2017-01-08 18:08:32	0	83.58.192.89	44	128	0	2017-01-15 18:08:46	R_2VIMUkBt0mmtfmI							anonymous	4	3				1			1				1
2017-01-08 18:15:19	2017-01-08 18:16:51	0	107.77.225.202	10	91	0	2017-01-15 18:17:37	R_2VP8BnaV0JeyebV							anonymous	4	3
2017-01-08 18:11:25	2017-01-08 18:19:06	0	188.28.159.97	10	461	0	2017-01-15 18:19:45	R_WilC4TNmiUkBypz							anonymous	4	5
2017-01-08 18:14:42	2017-01-08 18:19:17	0	80.71.142.158	10	275	0	2017-01-15 18:19:46	R_3JF8MYuUFLX9cfg							anonymous	4	7
2017-01-08 18:23:33	2017-01-08 18:24:02	0	174.201.8.180	10	29	0	2017-01-15 18:24:12	R_1o0y1lBDXl924p9							anonymous	4	7
2017-01-08 18:24:00	2017-01-08 18:26:32	0	72.49.4.141	24	151	0	2017-01-15 18:27:13	R_300IxKq1uaCYcDi							anonymous	4	2	More reliable			1
2017-01-08 18:30:01	2017-01-08 18:35:50	0	92.37.102.127	44	349	0	2017-01-15 18:36:08	R_vAoUCuDgvJUHAyZ							anonymous	4	6		Less damaging to women				1	6		Less damaging to women				1
2017-01-08 18:35:07	2017-01-08 18:40:18	0	203.45.92.108	54	310	0	2017-01-15 18:40:20	R_1EiytMDQKGw9NXM							anonymous	4	4							4							4	4	4
2017-01-08 18:24:00	2017-01-08 18:50:14	0	80.71.141.100	10	1574	0	2017-01-15 18:50:54	R_yBG5AiiYA46yOjv							anonymous	4	1
2017-01-08 18:44:56	2017-01-08 18:51:53	0	103.248.247.245	29	416	0	2017-01-15 18:52:41	R_2wn6TJdbDmXJMJz							anonymous	4	7		easier to convince people to use mosquito repellent than contraceptives			150		6
2017-01-08 19:01:28	2017-01-08 19:01:57	0	24.243.240.186	10	28	0	2017-01-15 19:02:00	R_1eK0IcXc9DVWvzg							anonymous	4	1
2017-01-08 18:30:05	2017-01-08 18:31:33	0	67.160.238.243	13	88	0	2017-01-15 19:02:08	R_bCwagi2XJdB4aRT							anonymous	4	5
2017-01-08 19:00:08	2017-01-08 19:05:21	0	166.181.83.54	10	312	0	2017-01-15 19:05:54	R_3eyLLabl0IYV4II							anonymous	4	3
2017-01-08 19:05:32	2017-01-08 19:06:35	0	95.90.253.201	2	63	0	2017-01-15 19:07:10	R_BsNgexGZhtVTVPr							anonymous	4
2017-01-08 18:53:12	2017-01-08 19:06:57	0	186.3.224.37	54	824	0	2017-01-15 19:07:31	R_1eFxDhxzgoNZmFM							anonymous	4	6		Women may want to have children in that period. Preventing pregnancies seems more extreme than just preventing pregnant women to get the virus.			101		6		Women may want to get pregnant in that period.			101								2	2	2
2017-01-08 19:06:02	2017-01-08 19:07:08	0	71.236.140.174	2	66	0	2017-01-15 19:07:33	R_YSu8I5ZPmNflRCx							anonymous	4
2017-01-08 17:52:38	2017-01-08 19:09:32	0	178.203.233.1	24	4613	0	2017-01-15 19:10:10	R_egndNGqsrW32YIp							anonymous	4	5		Birth is a natural thing regardless if there's a disease or not. It shouldn't be artificially procrastinatied.			1000	1
2017-01-08 19:08:06	2017-01-08 19:09:49	0	95.180.70.131	10	103	0	2017-01-15 19:10:20	R_2Uip3XJ19iWNahm							anonymous	4	5
2017-01-08 19:11:48	2017-01-08 19:13:00	0	107.209.182.162	10	71	0	2017-01-15 19:13:36	R_2qy3pc0SRSQgZPJ							anonymous	4	1
2017-01-08 19:19:44	2017-01-08 19:20:27	0	179.210.174.31	2	43	0	2017-01-15 19:21:02	R_2zYIRgESuvf6jIJ							anonymous	4
2017-01-08 19:17:07	2017-01-08 19:24:10	0	68.203.137.101	24	422	0	2017-01-15 19:24:19	R_2ZTZnH1Lq9soR1z							anonymous	4	7		You can't never be pregnant				1
2017-01-08 19:28:36	2017-01-08 19:28:55	0	220.244.20.113	2	18	0	2017-01-15 19:28:59	R_1qh6KeT8oJbBPEc							anonymous	4
2017-01-08 19:29:03	2017-01-08 19:30:21	0	181.132.72.54	10	77	0	2017-01-15 19:30:57	R_xu27zwPxF8B3xsd							anonymous	4	1
2017-01-08 19:30:42	2017-01-08 19:31:41	0	184.10.28.145	2	59	0	2017-01-15 19:32:12	R_1gHhMvyQwpN9rnt							anonymous	4
2017-01-08 19:41:16	2017-01-08 19:50:22	0	181.19.45.200	29	545	0	2017-01-15 19:51:17	R_1OVtJKUQEqpmEo5							anonymous	4	3	The repellent might affect health in other aspects and, since a virus like Zika is constantly evolving, it (the repellent) might not be always as effective as at the start.		1000				3
2017-01-08 19:53:09	2017-01-08 19:53:42	0	60.48.161.189	2	32	0	2017-01-15 19:54:09	R_25RtHU5JTJAt9Fs							anonymous	4
2017-01-08 19:54:09	2017-01-08 19:55:40	0	161.53.53.3	10	91	0	2017-01-15 19:56:10	R_3hEX7y9X8LRgtpQ							anonymous	4	1
2017-01-08 19:56:27	2017-01-08 19:58:20	0	69.71.81.100	10	113	0	2017-01-15 19:58:42	R_1psRN0tsv9yNwpu							anonymous	4	5
2017-01-08 20:05:24	2017-01-08 20:05:38	0	174.196.139.76	2	13	0	2017-01-15 20:05:58	R_3imsn7WTF5JSLAM							anonymous	4
2017-01-08 20:03:55	2017-01-08 20:05:27	0	66.91.20.50	10	92	0	2017-01-15 20:06:11	R_2ZCS7ZfPHlykLCT							anonymous	4	3
2017-01-08 20:02:30	2017-01-08 20:08:24	0	92.74.164.173	10	354	0	2017-01-15 20:08:26	R_1FaKmwV5DljcG9q							anonymous	4	7
2017-01-08 20:14:40	2017-01-08 20:15:20	0	105.102.70.104	2	40	0	2017-01-15 20:15:26	R_2RZZx6hN9kAicIk							anonymous	4
2017-01-08 20:11:46	2017-01-08 20:19:56	0	86.50.87.41	24	489	0	2017-01-15 20:19:57	R_p4Ur4qwujDk4iRP							anonymous	4	5		it seems to be targeted more to the cause			101
2017-01-08 20:20:36	2017-01-08 20:22:00	0	122.56.207.185	10	83	0	2017-01-15 20:22:53	R_3nDgTCjrVZ15cha							anonymous	4	3
2017-01-08 20:29:18	2017-01-08 20:29:43	0	67.190.86.45	2	24	0	2017-01-15 20:29:59	R_Q6dmGDvdeTM48tH							anonymous	4
2017-01-08 20:29:48	2017-01-08 20:31:27	0	2.82.245.118	10	99	0	2017-01-15 20:31:30	R_3ph7BVoJAE6m0JN							anonymous	4	1
2017-01-08 20:34:20	2017-01-08 20:35:03	0	50.169.108.211	10	43	0	2017-01-15 20:35:38	R_1hB99P5p3j0YOC1							anonymous	4	1
2017-01-08 20:27:35	2017-01-08 20:42:46	0	107.77.198.135	44	910	0	2017-01-15 20:42:55	R_1KkJHugXByk98U6							anonymous	4	7		It doesn't seem to me the risks of microcephaly are high enough to be promoting any sort sterilization. Temporary or not.				1	7		Contraception may prevent Tonya from existing leading to Thomas, but without it there may be a Tonya and Thomas. This also assumes microcephaly, or the potential for, is so bad that it's not worth being born. Last thing			699	1
2017-01-08 20:33:52	2017-01-08 20:43:21	0	105.225.52.26	24	569	0	2017-01-15 20:44:06	R_73OaZ8DRZB3L5L3							anonymous	4	7		Pregnancy is not always planned, those wanting to fall pregnant may not be able to wait for the virus to pass, better control of the spread of disease would negate the necessity for these choices. Neither is a 100% solution - there is compliance on the part of the mother in effective use of both the contraceptive and the repellent.			869	1
2017-01-08 20:41:14	2017-01-08 20:44:15	0	190.213.238.64	24	180	0	2017-01-15 20:45:08	R_RUdkvL76eNI6w3D							anonymous	4	2	Free contraception solves more problems than just Zika and microcephaly		782
2017-01-08 20:44:43	2017-01-08 20:49:32	0	68.184.13.235	29	289	0	2017-01-15 20:49:57	R_38bHyz0wLZnQqRz							anonymous	4	1	Contraception also prevents unplanned pregnancies, thus reducing abortions.		730				2
2017-01-15 13:21:25	2017-01-15 20:52:46	0	92.2.98.136	100	27080	1	2017-01-15 20:52:47	R_XvTBH7e6OoGYyLD					50.182205200195	-5.4158020019531	anonymous	4	6		More likely to be used			101		6		Would not impact on life choices e.g. when to have a child			101		4	4	2	7	3	2	2	2	2	2	British	34	5	2	2	2	2
2017-01-08 20:51:32	2017-01-08 20:54:49	0	87.115.255.20	10	196	0	2017-01-15 20:54:58	R_DJpxIF9EPXGpi7v							anonymous	4	1
2017-01-08 20:59:36	2017-01-08 21:00:10	0	31.48.65.12	2	34	0	2017-01-15 21:00:41	R_VUadrl6D0x1YCxH							anonymous	4
2017-01-08 21:00:14	2017-01-08 21:01:06	0	118.208.223.54	10	51	0	2017-01-15 21:01:13	R_RhlA5wUwad9nB05							anonymous	4	6
2017-01-08 20:49:20	2017-01-08 20:57:14	0	95.44.81.54	34	474	0	2017-01-15 21:02:51	R_5dLyTaMrjuo7wSF							anonymous	4	3	because women might not be aware of being pregnant on early stages and can still be hit with zika virus		101				3
2017-01-08 21:09:09	2017-01-08 21:09:29	0	73.194.142.140	2	20	0	2017-01-15 21:09:58	R_WBSiTW5mnu8RKQF							anonymous	4
2017-01-08 21:09:38	2017-01-08 21:10:12	0	151.224.116.112	2	34	0	2017-01-15 21:11:11	R_5dlGuQQKOGykx0d							anonymous	4
2017-01-08 21:20:37	2017-01-08 21:23:02	0	50.5.88.89	2	145	0	2017-01-15 21:23:22	R_33xVvxMAqg9S1Ga							anonymous	4
2017-01-08 21:23:14	2017-01-08 21:27:14	0	75.111.202.84	44	239	0	2017-01-15 21:28:12	R_3jfmyFmZxO1pxKp							anonymous	4	6		Seems like given equal effectiveness it would be better to avoid contraception.			648		6		It's better				1
2017-01-08 21:28:26	2017-01-08 21:29:13	0	73.143.125.242	10	47	0	2017-01-15 21:29:29	R_4SpJ0qGoQ5j1wGt							anonymous	4	2
2017-01-08 21:27:21	2017-01-08 21:29:48	0	209.93.158.1	24	146	0	2017-01-15 21:30:02	R_OcJhdKzywn9tnWx							anonymous	4	1			101	1
2017-01-08 21:31:44	2017-01-08 21:37:14	0	194.28.234.78	10	329	0	2017-01-15 21:37:47	R_29t8l0bgvMblFwQ							anonymous	4	5
2017-01-08 21:42:19	2017-01-08 21:42:30	0	24.5.87.239	2	11	0	2017-01-15 21:42:42	R_2Wx5XZer1bdj2Js							anonymous	4
2017-01-08 21:52:17	2017-01-08 21:53:24	0	75.130.207.12	10	67	0	2017-01-15 21:53:41	R_XpLNjiEoyAJFI0p							anonymous	4	5
2017-01-15 21:49:26	2017-01-15 21:59:06	0	131.111.202.95	100	580	1	2017-01-15 21:59:07	R_bvI8GeocdBgxxpD					52.199996948242	0.11669921875	anonymous	4	7		I first went with contraception but realised how long will we ask people to stop procreating? Contraception isn't 100% effective either. So onus needs to be on risk elimination. Hence repellent.				1	7		Which baby is or is not born is a matter of chance. It doesn't change the original imperative: risk elimination. So mosquito repellent is always the best choice. (What a change from what I thought when I had read the first question! :P)				1	6	3	7	1	1	1	2	2	2	2	Bangladeshi	29	6	1	2	2	1
2017-01-08 20:49:02	2017-01-08 21:12:29	0	49.183.206.197	68	1407	0	2017-01-15 22:03:14	R_0GrMXPnpdpRnxfD							anonymous	4	7		Choice - mosquito repellent doesn't impact a woman's right to have children, contraception does. Also, repellent has added bonus of stemming other mosquito borne diseases, which affect everyone, not just women of child bearing age. Thus greatest good for greatest number.				1	7		Greatest good for greatest number, no impact on reproductive choices, no impact on future demographics				1				2	2	2	4	3	2
2017-01-08 22:07:09	2017-01-08 22:08:31	0	70.195.208.224	10	82	0	2017-01-15 22:08:36	R_21vv2lIhf9FRaxG							anonymous	4	2
2017-01-15 22:01:49	2017-01-15 22:15:20	0	135.19.253.57	100	811	1	2017-01-15 22:15:22	R_A5Ve06XdtXVLP0d					45.558502197266	-73.538597106934	anonymous	4	1	Because contraception helps reduce birth rate and eventually, overpopulation.		1000	1			1			677	1			1	1	1	2	4	2	5	4	5	2	Canadian	22	5	4	1	2	3
2017-01-15 22:06:19	2017-01-15 22:19:21	0	189.61.222.45	100	782	1	2017-01-15 22:19:22	R_2TuAIYexbUnaxpz					-22.899993896484	-47.083297729492	anonymous	4	1	More comprehensive protection and reduces number of children improves quality of life.		101				1	Less children to feed etc. Better quality of life.		101				7	2	6	6	1	6	4	4	4	2	Brazilian	68	6	2	2	1	2
2017-01-08 22:13:26	2017-01-08 22:19:20	0	185.89.72.21	29	353	0	2017-01-15 22:20:10	R_3MLjkW2T5q7IHMN							anonymous	4	2	Mosquitos overcome repellents,less pregnancies means less potential cases of microcephaly		101	1			2
2017-01-08 22:25:34	2017-01-08 22:27:28	0	172.72.25.242	10	113	0	2017-01-15 22:27:34	R_3KJTsHJ0TtES4GI							anonymous	4	3
2017-01-08 22:23:41	2017-01-08 22:31:56	0	68.231.145.217	29	495	0	2017-01-15 22:32:29	R_1IN35Oajcewv9pj							anonymous	4	2	Population control			1			2
2017-01-08 22:50:37	2017-01-08 22:52:25	0	98.252.176.117	10	108	0	2017-01-15 22:53:01	R_3IVMXvCu0aXjwkv							anonymous	4	7
2017-01-08 22:50:30	2017-01-08 22:55:12	0	208.53.113.224	29	282	0	2017-01-15 22:55:25	R_1hNfBxwaqwBapxY							anonymous	4	5		Because some women may already be pregnant, and need immediate protection.			560		5
2017-01-08 22:44:51	2017-01-08 22:59:00	0	27.33.157.93	44	849	0	2017-01-15 22:59:08	R_sbtOTb2SIDQb6Ol							anonymous	4	1	If they are both equally effective in preventing zika. Providing women access to free birth control has the additional benefit of giving them control over reproductive choices.		150				1	Same reason as before.		150
2017-01-08 22:59:42	2017-01-08 23:00:49	0	73.69.27.70	10	66	0	2017-01-15 23:01:12	R_URflpIjTZIbMQ0h							anonymous	4	7
2017-01-08 22:50:56	2017-01-08 22:52:25	0	93.142.96.41	2	89	0	2017-01-15 23:03:45	R_3rcjc7yUUFgtGRf							anonymous	4
2017-01-08 22:07:51	2017-01-08 22:10:54	0	188.4.228.20	13	183	0	2017-01-15 23:03:49	R_8pS8rySAl8AqG4R							anonymous	4	1
2017-01-15 23:05:10	2017-01-15 23:15:32	0	86.17.45.80	100	621	1	2017-01-15 23:15:33	R_3hg3uvo9HzHKweq					52.973205566406	-1.3224029541016	anonymous	4	4							4							2	4	2	1	1	1	2	2	1	1	British	23	5	4	2	2	2
2017-01-15 22:53:24	2017-01-15 23:19:40	0	70.49.26.214	100	1576	1	2017-01-15 23:19:42	R_VVz7U3ibKUzAybf					43.690902709961	-79.837699890137	anonymous	4	6		Families may have many reasons to not choose contraceptives. This also may help existing pregnant women. People cannot be relied on to use either methods accurately, but may use repellent more often than contraceptives as they become necessary.			202	1	5		Unknown future, better to make decisions that will definitely affect the present rather than ones that might affect the future. Though the supposed guarantee of a healthy baby is good. Delaying pregnancies can be done through free educational channels, whereas mosquito repellent is a physical good that needs real money to create and distribute it.			1000	1	4	5	3	2	2	3	4	4	4	2	Canadian	22	5	1	2	2	3
2017-01-08 23:18:52	2017-01-08 23:20:30	0	175.156.3.196	10	97	0	2017-01-15 23:20:51	R_3rTKFj114BJX2cI							anonymous	4	6
2017-01-08 23:19:24	2017-01-08 23:21:18	0	86.23.16.46	10	113	0	2017-01-15 23:21:27	R_UyIcYDkEptV6nF7							anonymous	4	5
2017-01-08 23:11:09	2017-01-08 23:24:11	0	219.100.138.183	54	781	0	2017-01-15 23:24:18	R_2pWaLjsoEtss8LG							anonymous	4	4							4							4	4	4
2017-01-08 23:11:14	2017-01-08 23:24:34	0	146.198.236.226	10	799	0	2017-01-15 23:24:52	R_erFEUj2vsI19tkZ							anonymous	4	2
2017-01-08 23:28:23	2017-01-08 23:29:26	0	49.199.21.205	10	63	0	2017-01-15 23:30:01	R_T8l8B8YKsFuCthL							anonymous	4	7
2017-01-08 23:41:38	2017-01-08 23:41:47	0	73.41.71.118	2	8	0	2017-01-15 23:42:11	R_OKdBz2rLYpX1oZz							anonymous	4
2017-01-08 23:33:23	2017-01-08 23:49:48	0	69.5.131.1	10	985	0	2017-01-15 23:50:16	R_3Dev8RpuDRnWcIH							anonymous	4	3
2017-01-08 23:49:54	2017-01-08 23:53:30	0	173.35.1.88	10	216	0	2017-01-15 23:54:12	R_1ONyS9RyPYXwunY							anonymous	4	5
2017-01-15 23:48:05	2017-01-15 23:56:24	0	68.47.46.103	100	498	1	2017-01-15 23:56:25	R_eetk8thjMmVWv5v					44.999404907227	-93.296997070312	anonymous	4	5					101		5					538		6	5	5	1	1	1	2	2	2	2	American	33	5	1	2	2	3
2017-01-08 23:55:34	2017-01-08 23:55:50	0	124.188.46.31	2	15	0	2017-01-15 23:56:42	R_33rmv0SO5mPOXg0							anonymous	4
2017-01-08 23:53:49	2017-01-08 23:56:55	0	85.240.179.227	10	185	0	2017-01-15 23:57:37	R_3oHOv5mTr22Ovft							anonymous	4	5
2017-01-09 00:02:37	2017-01-09 00:02:48	0	172.56.39.135	2	10	0	2017-01-16 00:03:21	R_pt0A6V0SSbtleMN							anonymous	4
2017-01-08 23:43:48	2017-01-09 00:03:05	0	203.106.153.174	29	1156	0	2017-01-16 00:03:54	R_a2FNdrqXLJVO7eN							anonymous	4	6		Helps other people as well				1	6
2017-01-15 23:55:46	2017-01-16 00:04:19	0	77.98.51.184	100	512	1	2017-01-16 00:04:20	R_WwH7rYGu6qdZsE9					55.004699707031	-1.4727935791016	anonymous	4	4							4							4	3	3	3	2	2	4	1	3	2	Uk	50	6	2	1	1	2
2017-01-09 00:12:36	2017-01-09 00:17:05	0	72.39.163.130	29	269	0	2017-01-16 00:17:16	R_0wjWPLQ5daLvG93							anonymous	4	7		I believe contraception is wrong and makes us into a God over our bodies. Self control and using the bodies natural cycles is the only type of contraceptive I believe is valid.			130	1	7
2017-01-09 00:16:54	2017-01-09 00:24:05	0	138.217.251.106	29	430	0	2017-01-16 00:24:27	R_pRFZjRTGTTgltvz							anonymous	4	2	Because a choice can be made to avoid pregnancy until the virus is absent		101	1			2
2017-01-09 00:26:24	2017-01-09 00:27:55	0	108.69.126.111	10	91	0	2017-01-16 00:28:21	R_3EEDUjabSdGGS2G							anonymous	4	3
2017-01-09 00:47:02	2017-01-09 00:47:50	0	108.51.173.46	10	48	0	2017-01-16 00:48:17	R_1DpUhdJySBzFFqj							anonymous	4	7
2017-01-09 00:47:04	2017-01-09 00:53:16	0	71.222.23.113	54	371	0	2017-01-16 00:53:47	R_1ieZCj08gylY93w							anonymous	4	6		I felt it more likely to succeed, given that it was a choice unrelated to relationships and intimacy (contraception is easy to forget about, depending on what kind it is..)			135		4							6	3	3
2017-01-09 00:51:59	2017-01-09 00:56:57	0	90.206.31.132	29	298	0	2017-01-16 00:57:16	R_3pshzbZyT9Y3Iwb							anonymous	4	4							5
2017-01-09 00:56:28	2017-01-09 00:57:52	0	174.237.0.1	24	84	0	2017-01-16 00:58:15	R_vV7JnEw3TfgcVa1							anonymous	4	4
2017-01-09 01:02:14	2017-01-09 01:03:01	0	69.71.4.157	10	46	0	2017-01-16 01:03:17	R_10JzgwPGLwsXKUK							anonymous	4	1
2017-01-09 01:01:40	2017-01-09 01:03:13	0	107.77.196.214	24	92	0	2017-01-16 01:03:22	R_24vJ4T84M09rwlH							anonymous	4	4
2017-01-09 01:00:10	2017-01-09 01:05:34	0	71.197.155.209	29	323	0	2017-01-16 01:05:46	R_1gwm6aKRbRqgZ1r							anonymous	4	2	The world needs fewer children and women deserve a choice in when and if they reproduce.			1			2
2017-01-09 01:06:18	2017-01-09 01:06:36	0	73.251.134.242	2	17	0	2017-01-16 01:06:51	R_2tosC0UPFFZROmF							anonymous	4
2017-01-09 01:01:44	2017-01-09 01:07:45	0	172.58.142.129	44	360	0	2017-01-16 01:07:54	R_UmPSlSsnLPpOpFv							anonymous	4	6		I imagine it would be easier for women to comply (no religious implications)			201		6		I think it would be easier for women to comply (no religious implications)			201
2017-01-09 00:28:59	2017-01-09 01:20:57	0	107.3.1.53	63	3118	0	2017-01-16 01:21:23	R_1GPo0z5oas6W9PE							anonymous	4	2	Choice for womenswear		617				2	Unknown collateral damage of repellanr		678				4	4	4				3	3	3
2017-01-09 01:03:17	2017-01-09 01:22:13	0	73.69.230.68	29	1135	0	2017-01-16 01:22:26	R_2wcyefiYeUkTssV							anonymous	4	7		An effective method for this and other problems without impugning upon individual freedom.			201		7
2017-01-09 01:19:05	2017-01-09 01:22:37	0	50.64.153.17	29	211	0	2017-01-16 01:22:44	R_2QLOlL91HmzQ0m4							anonymous	4	1	Contraception has other benefits, such as preventing women and girls in school from becoming pregnant.		151				3
2017-01-09 01:28:46	2017-01-09 01:29:05	0	72.200.200.132	2	19	0	2017-01-16 01:29:06	R_3elx8zdr3QXqQi7							anonymous	4
2017-01-09 01:29:36	2017-01-09 01:30:08	0	73.129.63.200	10	31	0	2017-01-16 01:30:49	R_ZLfH8tbZgq4VrtD							anonymous	4	1
2017-01-09 01:30:43	2017-01-09 01:30:58	0	202.62.18.70	2	15	0	2017-01-16 01:31:02	R_2PaQIob4HukdGa0							anonymous	4
2017-01-09 01:31:09	2017-01-09 01:31:30	8	202.62.18.70	2	21	0	2017-01-16 01:31:53	R_1GQ6EzRGM1xcrCE							anonymous	4
2017-01-09 01:34:35	2017-01-09 01:34:50	0	73.39.93.137	2	14	0	2017-01-16 01:34:58	R_2colHlcUrXJS82R							anonymous	4
2017-01-09 01:23:41	2017-01-09 01:36:04	0	202.62.18.70	10	742	0	2017-01-16 01:36:29	R_2yl4hz2EXU3ndSG							anonymous	4	7
2017-01-09 01:38:20	2017-01-09 01:40:09	0	108.161.30.63	10	108	0	2017-01-16 01:40:39	R_296S1pHonCPEBa4							anonymous	4	2
2017-01-09 01:42:41	2017-01-09 01:43:04	0	72.178.3.129	2	23	0	2017-01-16 01:43:52	R_2XmlVtZxf9sN26g							anonymous	4
2017-01-09 01:47:12	2017-01-09 01:48:53	0	72.178.3.129	10	100	0	2017-01-16 01:49:35	R_1cSuTCZQtMu8cJn							anonymous	4	7
2017-01-09 01:53:52	2017-01-09 01:54:07	0	223.186.81.38	2	14	0	2017-01-16 01:54:11	R_x3f9LWBzYwp3wwp							anonymous	4
2017-01-09 00:26:23	2017-01-09 01:52:59	0	203.7.42.231	2	5196	0	2017-01-16 02:04:54	R_eCYyQpGIhJeJxRj							anonymous	4
2017-01-09 02:13:10	2017-01-09 02:14:36	0	223.227.15.91	10	86	0	2017-01-16 02:14:47	R_2QAtzDKPtaxMkLG							anonymous	4	2
2017-01-09 02:22:01	2017-01-09 02:26:54	0	73.97.177.28	10	292	0	2017-01-16 02:27:01	R_3m98OMFmZk6kh7I							anonymous	4	2
2017-01-09 02:27:12	2017-01-09 02:28:23	0	73.164.139.175	10	71	0	2017-01-16 02:28:43	R_3snWuN6AG56JJ4T							anonymous	4	2
2017-01-09 02:35:01	2017-01-09 02:36:09	0	45.36.164.51	10	68	0	2017-01-16 02:36:34	R_27VwTJmbGYWcNRm							anonymous	4	7
2017-01-09 02:36:00	2017-01-09 02:45:20	0	72.197.31.69	44	560	0	2017-01-16 02:45:47	R_2uCBmkFfhFmrky7							anonymous	4	5		Condoms wouldn't stop the women from getting Zika in the first place.			153		4
2017-01-09 02:42:25	2017-01-09 02:46:16	0	96.235.157.204	2	230	0	2017-01-16 02:46:17	R_Oyatn8zd0IkLKZb							anonymous	4
2017-01-09 02:47:37	2017-01-09 02:48:28	0	107.77.234.56	10	51	0	2017-01-16 02:48:35	R_1nZaBBjhotZ0Ud5							anonymous	4	6
2017-01-09 02:48:09	2017-01-09 02:48:32	0	24.19.54.5	2	23	0	2017-01-16 02:49:24	R_1mXHlMkGbiDGRSX							anonymous	4
2017-01-09 02:53:41	2017-01-09 02:55:28	0	104.0.56.174	10	106	0	2017-01-16 02:55:43	R_1lmXunulx6WcFa8							anonymous	4	3
2017-01-09 02:53:43	2017-01-09 02:59:31	0	111.92.98.213	29	348	0	2017-01-16 03:00:12	R_273AzB01usauMS9							anonymous	4	7		mosquito repellent would be beneficial to a large category of the citizens including pregnant women. moreover, this approach would also bring down the diseases spread by mosquitoes.			222		6
2017-01-09 03:00:55	2017-01-09 03:02:31	0	97.82.156.252	29	96	0	2017-01-16 03:02:32	R_DHQzkYUhA6MjBaF							anonymous	4	1	Wouldn't harm environment			1			5
2017-01-09 03:02:13	2017-01-09 03:03:50	0	73.39.35.226	10	97	0	2017-01-16 03:04:08	R_6mpDFIeQ5tLUFsl							anonymous	4	7
2017-01-09 01:45:46	2017-01-09 02:08:56	0	190.26.51.54	23	1390	0	2017-01-16 03:05:18	R_aYoRRwFR1Zl8y3j							anonymous	4	2	Because contraception prevents other diseases		163
2017-01-09 02:58:59	2017-01-09 03:06:50	0	104.179.137.2	24	470	0	2017-01-16 03:07:35	R_9mDzQHfAIECPqh3							anonymous	4	5		Chose repellent because mosquitos carry other diseases, too.			392	1
2017-01-09 03:06:06	2017-01-09 03:17:13	0	190.157.17.221	29	666	0	2017-01-16 03:17:50	R_23Vxc5vIkQxL4Dg							anonymous	4	6		It deals with an issue that doesn't invade o vulnerates the rights of women over their bodies.			829	1	6
2017-01-09 03:23:10	2017-01-09 03:29:22	0	111.95.125.217	44	371	0	2017-01-16 03:30:11	R_3EG5T3e8TlD5XTt							anonymous	4	1			622	1			1				1
2017-01-09 03:27:48	2017-01-09 03:30:38	0	174.238.144.73	29	169	0	2017-01-16 03:30:46	R_1E6Yr76cCoGAOBS							anonymous	4	1	Not for chemicals			1			1
2017-01-09 03:36:40	2017-01-09 03:36:55	0	110.142.30.32	2	14	0	2017-01-16 03:37:05	R_2fxHyWvOQ5roalc							anonymous	4
2017-01-09 03:40:08	2017-01-09 03:40:25	0	47.31.133.100	2	17	0	2017-01-16 03:41:11	R_3kaWRe9KvXv20wl							anonymous	4
2017-01-09 03:42:58	2017-01-09 03:46:32	0	174.2.10.216	24	214	0	2017-01-16 03:46:51	R_1LoH1pEWZcImyIC							anonymous	4	4
2017-01-09 03:42:59	2017-01-09 03:54:28	0	50.64.22.13	68	688	0	2017-01-16 03:54:45	R_110B2PX2dIqZncf							anonymous	4	2	More control over the outcome and helps other potential ailments, people may for get to apply the repellent and only one bite is needed, from my experience it can be difficult to constantly apply repellent and no one wants to sleep in that- so you would need mosquito nets for night. Depending on the contraception method it may help avoid STDs.		115				4							5	3	3	1	1	1
2017-01-09 01:53:06	2017-01-09 04:02:56	0	201.53.113.217	29	7789	0	2017-01-16 04:02:59	R_1f3klX2p4F4tJfw							anonymous	4	7		Because a virus can't interfere in women reproductive rights over their bodies.			501	1	6
2017-01-09 04:18:08	2017-01-09 04:18:17	0	124.169.3.66	2	9	0	2017-01-16 04:18:42	R_2A0Gepi20awayIY							anonymous	4
2017-01-09 04:43:46	2017-01-09 04:44:59	0	106.76.37.143	2	72	0	2017-01-16 04:45:14	R_21BUUWnZOFeTwzb							anonymous	4
2017-01-09 04:43:23	2017-01-09 04:46:43	0	135.23.158.38	29	199	0	2017-01-16 04:47:38	R_bNnvUmHC6sPSjXX							anonymous	4	7					301		7
2017-01-09 04:44:49	2017-01-09 04:48:19	0	42.109.192.131	10	210	0	2017-01-16 04:48:26	R_1jHW12rj2LnU51t							anonymous	4	7
2017-01-09 04:48:42	2017-01-09 04:49:06	0	122.61.67.242	2	23	0	2017-01-16 04:49:46	R_0pOCiLO6B2oPlJL							anonymous	4
2017-01-09 05:05:24	2017-01-09 05:10:39	0	103.194.21.146	44	314	0	2017-01-16 05:11:33	R_2S99eLelDObSJUZ							anonymous	4	7		Because irrespective of contraception, certain people would want to desperately have babies (age factor etc) and might be ready to take risks for it. Instead why not make it safe pregnancy if it for certain that the repellent would work.			449	1	7						1
2017-01-09 05:10:23	2017-01-09 05:11:42	0	97.94.16.42	10	78	0	2017-01-16 05:12:03	R_3KCNbfNwz2dur3s							anonymous	4	5
2017-01-09 05:11:04	2017-01-09 05:12:03	0	66.216.233.235	10	58	0	2017-01-16 05:12:42	R_3EtZcZICuA1wpiZ							anonymous	4	1
2017-01-09 04:30:33	2017-01-09 05:13:42	0	99.250.193.24	2	2589	0	2017-01-16 05:13:45	R_3MDweatCZFsOEyj							anonymous	4
2017-01-09 05:16:44	2017-01-09 05:17:54	0	75.159.147.166	10	70	0	2017-01-16 05:18:00	R_1hAsB9LVuaCyKYN							anonymous	4	2
2017-01-09 05:18:03	2017-01-09 05:18:14	0	158.140.167.49	2	10	0	2017-01-16 05:18:49	R_27NyeOG5TBB8pbd							anonymous	4
2017-01-09 05:33:42	2017-01-09 05:36:48	0	75.39.108.201	24	186	0	2017-01-16 05:36:49	R_2YXtZdmjmxh1ATG							anonymous	4	1	Contraception prevents; mosquito repellent just tries to keep them away		183
2017-01-09 05:42:38	2017-01-09 05:45:09	0	82.217.227.80	10	150	0	2017-01-16 05:45:40	R_120iVOIoDU98ame							anonymous	4	5
2017-01-09 05:42:05	2017-01-09 05:46:32	0	213.37.129.37	44	266	0	2017-01-16 05:46:42	R_2duVyA4h0Hxx30b							anonymous	4	3			150				6					150
2017-01-09 04:53:36	2017-01-09 05:51:16	0	171.51.71.62	2	3460	0	2017-01-16 05:52:01	R_574huFbCMMWTFYZ							anonymous	4
2017-01-09 05:55:23	2017-01-09 05:58:31	0	65.112.11.35	44	187	0	2017-01-16 05:59:03	R_pyYUSNTWClTE9l7							anonymous	4	4							5					101
2017-01-08 20:28:37	2017-01-09 05:30:07	0	203.214.92.172	13	32490	0	2017-01-16 06:05:39	R_3EJ1tIbm0f2i6Ed							anonymous	4	1
2017-01-09 06:11:30	2017-01-09 06:11:47	0	73.200.124.39	2	16	0	2017-01-16 06:12:31	R_3dZlXgRR6JW0H9q							anonymous	4
2017-01-09 06:17:26	2017-01-09 06:17:56	0	37.163.32.101	2	29	0	2017-01-16 06:18:29	R_2YSubw5ZFhUIKex							anonymous	4
2017-01-09 06:26:09	2017-01-09 06:29:01	0	101.183.110.100	2	171	0	2017-01-16 06:29:07	R_2atdm5fdO3xIYRV							anonymous	4
2017-01-09 06:46:45	2017-01-09 06:48:06	0	37.138.193.240	10	81	0	2017-01-16 06:48:49	R_QnogXFux4BqElUJ							anonymous	4	7
2017-01-06 06:59:22	2017-01-09 07:04:55	0	220.244.7.238	2	259532	0	2017-01-16 07:05:25	R_3iIjknz65MZF5k7							anonymous	4
2017-01-09 07:05:54	2017-01-09 07:10:00	0	86.30.247.48	29	246	0	2017-01-16 07:10:03	R_3e2zKzB5ngjHAfC							anonymous	4	6		Contraception will protect women not wanting to get pregnant, doesn't account for those planning to have a pregnancy			1000		6
2017-01-09 07:23:13	2017-01-09 07:23:29	0	79.113.168.115	2	15	0	2017-01-16 07:24:02	R_u31yjvMCdLIpzH3							anonymous	4
2017-01-09 07:29:58	2017-01-09 07:32:40	0	187.36.35.228	10	161	0	2017-01-16 07:32:41	R_28UnEW3wxQtJfyi							anonymous	4	7
2017-01-09 07:30:45	2017-01-09 07:32:54	0	72.74.149.72	10	129	0	2017-01-16 07:33:15	R_3L7LzWY5yihz7SS							anonymous	4	7
2017-01-09 07:49:26	2017-01-09 07:51:04	0	47.72.211.164	10	97	0	2017-01-16 07:51:30	R_3KNiHJzC2OanBfa							anonymous	4	6
2017-01-09 07:54:14	2017-01-09 07:54:34	0	163.47.70.177	2	20	0	2017-01-16 07:54:44	R_1lbG6sDQGY0umX0							anonymous	4
2017-01-09 07:47:47	2017-01-09 07:54:13	0	95.175.104.81	13	386	0	2017-01-16 08:06:35	R_0xKmbFi15eEaCEd							anonymous	4	1
2017-01-09 08:29:01	2017-01-09 08:32:36	0	185.137.18.153	44	215	0	2017-01-16 08:32:42	R_1pty3czthVualFE							anonymous	4	1	to be sure		1000	1			1	life is gamble anyway		1000	1
2017-01-09 08:43:16	2017-01-09 08:43:40	0	36.37.226.35	2	23	0	2017-01-16 08:44:33	R_3hbcIH6vD8hjhxY							anonymous	4
2017-01-09 07:17:47	2017-01-09 08:28:17	0	117.198.109.110	63	4230	0	2017-01-16 09:06:38	R_033pVdmt6EwS10N							anonymous	4	2	To completely avoid the chances of a baby being born with abnormalities. There is still a chance of pregnant women getting infected even with repellents		502				2	A healthier baby is more important than not changing the existence of a baby in the future.		503				4	3	3				2	2	2
2017-01-09 08:00:29	2017-01-09 08:09:06	0	42.109.162.79	23	517	0	2017-01-16 09:06:41	R_9NwroUUNwQ9Tjmd							anonymous	4	4
2017-01-09 09:03:40	2017-01-09 09:06:34	0	110.149.158.203	24	173	0	2017-01-16 09:07:31	R_1lhi8TcsX5Sh4JM							anonymous	4	1	Contraception provision has many other benifits and wmpowers women. Repellent is less reliable.			1
2017-01-09 09:07:14	2017-01-09 09:08:01	0	115.188.61.74	10	47	0	2017-01-16 09:08:25	R_1gja7Xd4EBKzD9Y							anonymous	4	3
2017-01-09 09:09:46	2017-01-09 09:10:49	0	78.134.149.59	2	62	0	2017-01-16 09:11:22	R_12njNCzX1sOPOap							anonymous	4
2017-01-09 09:19:27	2017-01-09 09:24:51	0	212.99.112.100	59	323	0	2017-01-16 09:24:52	R_2CeUOzNx5yuxOMj							anonymous	4	2	"		120	1			2			118	1						2	1	3
2017-01-09 09:45:09	2017-01-09 09:45:23	0	122.167.213.31	2	14	0	2017-01-16 09:45:28	R_1i2ujtSKP9f92ri							anonymous	4
2017-01-09 09:42:55	2017-01-09 09:51:02	0	115.114.78.226	2	487	0	2017-01-16 09:51:09	R_O8c97HeH2KOxIpX							anonymous	4
2017-01-09 10:07:01	2017-01-09 10:08:56	0	93.86.37.6	10	114	0	2017-01-16 10:09:40	R_2YWF4lrYBWSrUFH							anonymous	4	6
2017-01-09 10:10:34	2017-01-09 10:13:27	0	31.10.172.55	10	173	0	2017-01-16 10:13:33	R_20OSx7nzfbSNnmF							anonymous	4	5
2017-01-09 10:08:10	2017-01-09 10:23:19	0	131.180.113.26	29	908	0	2017-01-16 10:23:28	R_331Q3qqNCoDItjN							anonymous	4	3	because of it's potential to prevent other sicknesses and problems		101				3
2017-01-09 07:49:08	2017-01-09 10:23:16	0	87.60.182.22	2	9247	0	2017-01-16 10:23:28	R_pg8SmfoN8Lcafx7							anonymous	4
2017-01-09 10:29:12	2017-01-09 10:29:26	0	47.29.116.112	2	14	0	2017-01-16 10:29:35	R_3kmOd20gvy3o3Wd							anonymous	4
2017-01-09 10:26:55	2017-01-09 10:30:35	0	37.142.174.126	29	220	0	2017-01-16 10:31:28	R_1oj6jWksleoXpdp							anonymous	4	4							3
2017-01-09 10:33:48	2017-01-09 10:34:44	0	62.74.24.26	10	55	0	2017-01-16 10:35:01	R_W1d31JeHqXZfeBH							anonymous	4	5
2017-01-09 10:30:03	2017-01-09 10:34:52	0	86.30.20.134	24	289	0	2017-01-16 10:35:33	R_2ea6wGiVG2lYZjC							anonymous	4	7		It is the less extreme prevention			101
2017-01-09 10:19:52	2017-01-09 10:35:41	0	2.28.117.206	10	948	0	2017-01-16 10:36:13	R_VJzbDn1n4SbCQlH							anonymous	4	3
2017-01-09 10:32:44	2017-01-09 10:39:17	0	89.114.185.7	44	392	0	2017-01-16 10:39:20	R_3HApOAVSIVAy93v							anonymous	4	1	Better prevent than try to cure. Contraception has the added benefit of also contributing to reducing the number of unwanted pregnancies which can also ultimately come at a high individual and social cost.		501				1	Because I don't believe that it's relevant whether the baby born is a Tanya or a Thomas. The child will grow into the person life shapes it into, it sounds an awful lot like religious fundamentalism to defend taking public health risks just because 'a different baby would be born later'. I don't buy it philosophically, religiously or from a collective ethics point of view.		499
2017-01-09 10:36:16	2017-01-09 10:39:51	0	190.236.204.59	29	215	0	2017-01-16 10:39:59	R_2qCatEcmF1dBI6W							anonymous	4	1				1			1
2017-01-09 10:50:11	2017-01-09 10:51:50	0	195.221.123.2	10	98	0	2017-01-16 10:52:06	R_1OHwoBB1mGXv67m							anonymous	4	2
2017-01-09 10:57:24	2017-01-09 10:58:42	0	107.77.205.125	10	78	0	2017-01-16 10:58:51	R_2rroQHuCwB0cQ7o							anonymous	4	3
2017-01-09 10:15:10	2017-01-09 10:29:14	0	178.55.248.110	34	844	0	2017-01-16 11:07:41	R_e2tDBmM44rY9Uzj							anonymous	4	2	Because in the long run, contraception entails more elements than just controlling the virus, for instance, the increasing of population and other matters, and probably will create less waste than the production of thousands of repellent.		600				3
2017-01-08 13:52:57	2017-01-09 11:11:43	0	93.34.226.157	2	76726	0	2017-01-16 11:12:35	R_3Dqo9Ubk8JhtGwd							anonymous	4
2017-01-09 11:12:20	2017-01-09 11:13:26	0	1.20.114.189	10	65	0	2017-01-16 11:13:41	R_10IUf2dwevdywqz							anonymous	4	6
2017-01-09 11:23:13	2017-01-09 11:23:41	0	213.205.198.91	10	27	0	2017-01-16 11:24:07	R_UKITDKj13SlKT4t							anonymous	4	2
2017-01-09 11:15:27	2017-01-09 11:42:22	0	80.232.171.53	24	1614	0	2017-01-16 11:42:23	R_1qeTrvMffLeudmB							anonymous	4	6		Effective			101
2017-01-09 11:28:04	2017-01-09 11:45:43	0	195.29.117.20	29	1059	0	2017-01-16 11:46:32	R_1IubNgsfE8ycqdu							anonymous	4	5		At first free contraception seemed like a more reliable solution, but since it is clearly stated that both solutions are equally effective, I chose the mosquito repellent because it is not so invasive with respect to the women's privacy and life choices.			500		6
2017-01-09 11:46:25	2017-01-09 11:49:22	0	185.89.218.227	54	177	0	2017-01-16 11:50:10	R_3k0vH5Ecy0zJTgO							anonymous	4	4							6		After reading				1	4	4	3
2017-01-09 11:50:34	2017-01-09 11:52:22	0	24.6.51.198	2	107	0	2017-01-16 11:53:13	R_1N3LEobWIjcNmst							anonymous	4
2017-01-09 11:53:01	2017-01-09 11:54:52	0	101.183.118.32	10	110	0	2017-01-16 11:55:17	R_2Y4hCuPuIVk0KeA							anonymous	4	6
2017-01-09 09:12:18	2017-01-09 11:58:31	0	192.76.8.24	2	9973	0	2017-01-16 11:59:17	R_AsQw0g9RuHIhZex							anonymous	4
2017-01-09 12:06:23	2017-01-09 12:07:55	0	58.188.249.156	2	91	0	2017-01-16 12:08:03	R_3pmVeEjYhoutEZR							anonymous	4
2017-01-09 11:51:02	2017-01-09 12:20:28	0	179.159.40.242	44	1766	0	2017-01-16 12:21:02	R_1pVD4m6rRIo0kBV							anonymous	4	7		If the two methods are equally efficient, I do'nt see why to reduce the population size to control the disease.			101		7		If the 2 methods are equally effective I don't see any reason for social interference			101
2017-01-09 12:26:38	2017-01-09 12:30:51	0	85.96.11.148	29	252	0	2017-01-16 12:31:17	R_1C1NK4cWJ5YT4B4							anonymous	4	1	The world is already struggling with overpopulation as it is.		101				1
2017-01-09 12:51:39	2017-01-09 12:52:48	0	71.80.76.212	10	68	0	2017-01-16 12:53:27	R_3sub9FuIr6Ze1ck							anonymous	4	1
2017-01-09 12:48:02	2017-01-09 12:55:54	0	70.197.135.90	68	471	0	2017-01-16 12:56:34	R_1l3jqDD2I8savFP							anonymous	4	2	I suspect compliance might be greater.		502				2	The "different baby" argument is not adequate for changing my mind. "Different babies" are a given no matter the situation.		500				4	2	4	2	2	2
2017-01-09 13:01:36	2017-01-09 13:05:44	0	212.144.15.157	29	248	0	2017-01-16 13:05:46	R_tE4wJjTZXhqGbYJ							anonymous	4	5		I chose Mosquito repellent because I believe that they spread other diseases as well which would make the repellent useful in more than one case.			830		6
2017-01-08 15:47:02	2017-01-09 13:28:18	0	172.91.254.127	59	78076	0	2017-01-16 13:28:20	R_1MZdyQ8PNq8fMSt							anonymous	4	7		Many will not use contraception anyway. And fuck mosquitos. We should already be using the repellant regardless.			101		7		They work the same but contraception for a time means a lower population. But more humans is on the whole a good thing.			101					4	4	4
2017-01-09 13:30:00	2017-01-09 13:31:32	0	209.171.88.221	10	91	0	2017-01-16 13:31:50	R_1QGCE2xj1OE7Hkk							anonymous	4	1
2017-01-09 13:36:41	2017-01-09 13:37:24	0	193.205.210.82	2	43	0	2017-01-16 13:37:35	R_9ugdIXAwuYbrOMh							anonymous	4
2017-01-09 14:04:53	2017-01-09 14:05:34	0	187.183.39.123	2	40	0	2017-01-16 14:05:47	R_PO0D2ORBeJfmvSx							anonymous	4
2017-01-09 14:06:46	2017-01-09 14:07:33	0	173.174.150.229	10	46	0	2017-01-16 14:07:38	R_31gxgctMQbztszy							anonymous	4	2
2017-01-09 14:08:54	2017-01-09 14:09:25	0	136.63.55.215	10	31	0	2017-01-16 14:09:45	R_1KuLiazrU18QSr0							anonymous	4	1
2017-01-09 14:13:08	2017-01-09 14:14:26	0	213.205.251.239	10	78	0	2017-01-16 14:14:38	R_2Yy2k8lVUB6BvuR							anonymous	4	2
2017-01-09 14:46:48	2017-01-09 14:47:31	0	174.208.5.18	2	42	0	2017-01-16 14:47:36	R_paOwof0MxWSkzFn							anonymous	4
2017-01-09 14:47:06	2017-01-09 14:47:35	0	71.71.198.182	2	28	0	2017-01-16 14:48:07	R_TpiCMu3gTxjimfn							anonymous	4
2017-01-09 14:56:20	2017-01-09 14:59:33	0	89.101.245.170	29	192	0	2017-01-16 14:59:35	R_eqzVUHesxOQmkPn							anonymous	4	2	For wider reproductive-health benefits		180				3
2017-01-09 15:27:34	2017-01-09 15:29:14	0	178.233.208.218	10	100	0	2017-01-16 15:29:58	R_1oCscVLJImqydJn							anonymous	4	3
2017-01-09 15:37:16	2017-01-09 15:39:45	0	35.128.13.18	29	149	0	2017-01-16 15:39:53	R_2fuI23Vlhf0Bwr1							anonymous	4	1	More effective		101				1
2017-01-09 15:53:52	2017-01-09 15:53:55	0	38.140.11.2	2	3	0	2017-01-16 15:54:43	R_2dNpF9WA6F8RTDZ							anonymous	4
2017-01-09 13:15:08	2017-01-09 16:02:57	0	150.212.23.45	10	10069	0	2017-01-16 16:03:06	R_3fqtY4dgR8J6djB							anonymous	4	2
2017-01-09 15:56:10	2017-01-09 16:04:19	0	108.161.118.255	10	488	0	2017-01-16 16:04:53	R_3jSRt2VHf8aJzWm							anonymous	4	2
2017-01-09 16:05:04	2017-01-09 16:05:40	0	151.230.188.158	2	36	0	2017-01-16 16:06:12	R_8qpk9FILQZDjtcZ							anonymous	4
2017-01-09 15:34:59	2017-01-09 15:43:23	0	70.194.12.74	54	504	0	2017-01-16 16:09:17	R_78PLY09SouxW04d							anonymous	4	2			708				6						1							4	3	3
2017-01-09 16:19:50	2017-01-09 16:22:16	0	67.6.208.233	10	145	0	2017-01-16 16:22:46	R_1IBhVh3fDSUYZ1D							anonymous	4	1
2017-01-09 16:53:42	2017-01-09 17:06:01	0	24.114.75.153	29	738	0	2017-01-16 17:06:10	R_3KDEodr4d0nwDIG							anonymous	4	2	Surer method of prevention.		101				1
2017-01-09 16:37:49	2017-01-09 16:39:07	0	112.203.101.200	13	78	0	2017-01-16 17:10:04	R_dgV4ROPI1uhyG5D							anonymous	4	1
2017-01-09 17:14:37	2017-01-09 17:15:00	0	178.193.84.120	2	22	0	2017-01-16 17:15:38	R_31apU4bSHFR0MHc							anonymous	4
2017-01-09 17:05:44	2017-01-09 17:23:16	0	212.112.152.87	2	1052	0	2017-01-16 17:23:23	R_1j81SkL5iDYIxmF							anonymous	4
2017-01-09 18:08:04	2017-01-09 18:43:38	0	5.151.0.3	10	2134	0	2017-01-16 18:43:54	R_30xi7wLGdTtM8gb							anonymous	4	5
2017-01-09 18:45:29	2017-01-09 18:45:33	0	188.216.177.196	2	3	0	2017-01-16 18:46:24	R_3rTnG0sWgueRRxC							anonymous	4
2017-01-09 19:03:21	2017-01-09 19:05:04	0	192.231.86.239	10	102	0	2017-01-16 19:05:06	R_23Wasmkpd8zmYrh							anonymous	4	2
2017-01-09 19:27:02	2017-01-09 19:30:33	0	162.129.251.82	59	210	0	2017-01-16 19:31:25	R_3szEDQWbwQTkeWq							anonymous	4	4							4										6	2	2
2017-01-09 19:36:29	2017-01-09 19:37:04	0	82.132.217.139	24	34	0	2017-01-16 19:37:15	R_3jeMwk98135sgNY							anonymous	4	4
2017-01-09 20:24:04	2017-01-09 20:26:18	0	121.79.204.54	10	134	0	2017-01-16 20:26:54	R_1ihy6JrtRTaYMzi							anonymous	4	6
2017-01-09 20:27:02	2017-01-09 20:29:39	0	82.132.246.59	10	157	0	2017-01-16 20:30:02	R_5gn7CQDfQOuSqHf							anonymous	4	2
2017-01-09 20:38:55	2017-01-09 20:41:02	0	177.82.15.105	24	127	0	2017-01-16 20:41:20	R_3Jnpgi5oAsyA7qS							anonymous	4	1			101
2017-01-09 20:51:08	2017-01-09 21:05:02	0	46.28.53.168	29	834	0	2017-01-16 21:05:32	R_2wpflwBQR5ExA16							anonymous	4	5		The effects of contraception will be felt later, but the effects of mosquito repellent would be immediate and less disruptive tonthe birth rate.			101		7
2017-01-09 01:03:23	2017-01-09 21:07:40	0	177.194.183.218	63	72256	0	2017-01-16 21:08:24	R_tPRUqmyYODAXxjH							anonymous	4	7		Because the main problem isn't the pregnancy, but the prevention, which is an interest of all citizens.			462	1	7		Because it isn't logical to avoid cases by altering the life project of thousands of people just to reduce statistics.				1	5	6	5				2	2	2
2017-01-09 21:50:57	2017-01-09 21:53:41	0	99.224.215.38	24	164	0	2017-01-16 21:54:25	R_1P7fuEW6nyN3FXj							anonymous	4	7		Uncertainty around when the outbreak will pass			300
2017-01-09 22:01:14	2017-01-09 22:03:06	0	172.13.88.225	10	112	0	2017-01-16 22:03:54	R_PM5RPOwTD2Am6nn							anonymous	4	1
2017-01-09 22:02:58	2017-01-09 22:03:39	0	67.197.233.55	10	41	0	2017-01-16 22:04:09	R_1eLThZ1KJrWVKPX							anonymous	4	7
2017-01-09 22:02:52	2017-01-09 22:04:03	0	109.255.94.8	10	70	0	2017-01-16 22:04:10	R_ulzFKjv3RBITVu1							anonymous	4	5
2017-01-09 22:01:39	2017-01-09 22:04:28	0	132.250.138.50	29	169	0	2017-01-16 22:04:59	R_3haKMP5rpgQ69i8							anonymous	4	6		It makes more sense to protect women that might become pregnant than it does to encourage women to delay pregnancy.			500		6
2017-01-09 22:02:43	2017-01-09 22:04:46	0	86.147.189.150	29	123	0	2017-01-16 22:05:01	R_2Yb2EL6KpoZPpJO							anonymous	4	4							5
2017-01-09 22:03:00	2017-01-09 22:04:50	0	93.126.135.95	24	110	0	2017-01-16 22:05:01	R_3lyQfXeX6Z0oJHS							anonymous	4	6					101
2017-01-09 22:02:28	2017-01-09 22:05:02	0	176.240.196.104	24	153	0	2017-01-16 22:05:40	R_26bE2WKdKg6JMbU							anonymous	4	4
2017-01-09 22:05:20	2017-01-09 22:05:44	0	75.50.179.121	10	24	0	2017-01-16 22:05:50	R_2D22CsJBlyuHwg8							anonymous	4	1
2017-01-09 22:05:18	2017-01-09 22:05:30	0	72.231.6.77	2	11	0	2017-01-16 22:06:04	R_21dh6ntO4bIxBmw							anonymous	4
2017-01-09 22:04:54	2017-01-09 22:05:10	0	24.121.121.197	10	16	0	2017-01-16 22:06:04	R_3DdWtknwI4R87FF							anonymous	4	7
2017-01-09 22:05:32	2017-01-09 22:05:57	0	65.79.144.126	10	25	0	2017-01-16 22:06:06	R_3Ms1aX0EAt0Yoyq							anonymous	4	7
2017-01-09 22:05:59	2017-01-09 22:06:16	0	73.16.211.137	2	16	0	2017-01-16 22:06:18	R_3p5zEfFkR6onnxF							anonymous	4
2017-01-09 22:06:07	2017-01-09 22:06:36	0	209.95.50.13	2	29	0	2017-01-16 22:07:09	R_9pNryrwJUUaE5P3							anonymous	4
2017-01-09 22:06:51	2017-01-09 22:07:13	0	76.14.127.229	10	22	0	2017-01-16 22:07:15	R_1lmCXoWyDegQvc7							anonymous	4	1
2017-01-09 22:03:39	2017-01-09 22:07:44	0	71.217.46.11	29	244	0	2017-01-16 22:07:48	R_2aDLLuEm87lckyD							anonymous	4	7		Religious reaons, as well as a wish to allow women to continue having children without interference			870	1	7
2017-01-09 22:06:52	2017-01-09 22:07:45	0	199.204.56.144	10	52	0	2017-01-16 22:08:10	R_1nYOx3UFWHpkZH6							anonymous	4	6
2017-01-09 22:02:12	2017-01-09 22:08:28	0	192.72.255.12	29	375	0	2017-01-16 22:08:43	R_3Ny9VK96F9vlmfe							anonymous	4	7		Everyone needs mosquito repellent, not everyone needs contraception.			200	1	7
2017-01-09 22:07:59	2017-01-09 22:09:51	0	82.230.121.246	24	112	0	2017-01-16 22:10:20	R_3nooJIMwHHpVC37							anonymous	4	4
2017-01-09 22:08:57	2017-01-09 22:09:38	0	140.209.14.85	10	40	0	2017-01-16 22:10:20	R_30pFgTtXTmB73id							anonymous	4	7
2017-01-09 22:09:11	2017-01-09 22:10:00	0	2.12.60.179	10	48	0	2017-01-16 22:10:21	R_Uc4qOWG7azsHBvP							anonymous	4	7
2017-01-09 22:08:45	2017-01-09 22:10:39	0	108.248.102.162	10	114	0	2017-01-16 22:10:43	R_2vdYraMwJW30ByC							anonymous	4	5
2017-01-09 22:03:11	2017-01-09 22:03:52	0	209.169.107.104	2	41	0	2017-01-16 22:11:14	R_9Exccat1rqnlPVz							anonymous	4
2017-01-09 22:02:35	2017-01-09 22:11:03	0	176.190.29.149	44	508	0	2017-01-16 22:11:16	R_bejjatGIb316t7v							anonymous	4	4							5		If a woman is already pregnant, it's too late for contraception whereas mosquito repellent can still be efficient.			101
2017-01-09 22:03:02	2017-01-09 22:04:16	0	76.14.127.229	13	74	0	2017-01-16 22:11:17	R_cHXAQW36buFiaXj							anonymous	4	7
2017-01-09 22:09:22	2017-01-09 22:11:29	0	108.86.212.227	24	126	0	2017-01-16 22:11:31	R_3HRFOF2v2kFrRO6							anonymous	4	1	Repllent has many areas whwre it can fail. Contraception will fail less		1000
2017-01-09 22:05:48	2017-01-09 22:12:06	0	24.113.118.82	54	377	0	2017-01-16 22:12:27	R_3OofLsASuUWNXyI							anonymous	4	3	I don't have much data, but I doubt the effectiveness of repellent. Could be totally wrong.		101				5		I was given better information			101		4	3	6
2017-01-09 22:09:44	2017-01-09 22:13:51	0	130.179.244.45	10	246	0	2017-01-16 22:14:13	R_1QmYccjlgptXZXk							anonymous	4	7
2017-01-09 22:13:37	2017-01-09 22:13:50	0	203.206.65.248	2	13	0	2017-01-16 22:14:13	R_WDuPjHX1eaFOhyh							anonymous	4
2017-01-09 22:15:43	2017-01-09 22:15:59	0	92.232.15.132	2	15	0	2017-01-16 22:16:03	R_21I2lxbXlKuRhUP							anonymous	4
2017-01-09 22:15:18	2017-01-09 22:16:44	0	192.76.28.107	10	85	0	2017-01-16 22:16:45	R_PGkth6i5Ywnr7O1							anonymous	4	3
2017-01-09 22:15:20	2017-01-09 22:17:08	0	115.113.11.143	44	107	0	2017-01-16 22:17:42	R_2WCmK7H7PnqTSBg							anonymous	4	4							4
2017-01-09 22:19:59	2017-01-09 22:20:53	0	50.188.53.90	10	54	0	2017-01-16 22:20:55	R_2TOiTR9DJ9KNsS5							anonymous	4	2
2017-01-09 22:23:19	2017-01-09 22:24:04	0	108.65.79.143	10	44	0	2017-01-16 22:24:55	R_2ZNR03FaHoYEuDt							anonymous	4	6
2017-01-09 22:24:30	2017-01-09 22:24:44	0	98.204.176.9	2	14	0	2017-01-16 22:24:58	R_79QB45oYCG4UayJ							anonymous	4
2017-01-09 22:28:47	2017-01-09 22:29:55	0	97.102.15.63	10	67	0	2017-01-16 22:30:20	R_1KxLQzu3EWJFb3l							anonymous	4	1
2017-01-09 22:05:37	2017-01-09 22:30:42	0	96.90.212.149	10	1505	0	2017-01-16 22:31:24	R_1FmpCxfnOOREfPY							anonymous	4	7
2017-01-09 22:23:56	2017-01-09 22:31:24	0	86.152.20.213	54	448	0	2017-01-16 22:31:42	R_2YcdZMmz1SLLuL6							anonymous	4	2			758	1			2			786	1									5	5	5
2017-01-09 22:30:47	2017-01-09 22:33:04	0	47.50.179.162	29	136	0	2017-01-16 22:33:11	R_1eOwztUTwpDr0bF							anonymous	4	6		Moral scruples about contraception			400		6
2017-01-09 22:29:28	2017-01-09 22:33:31	0	67.85.216.102	29	243	0	2017-01-16 22:34:18	R_Z42Prftzmc2KLCN							anonymous	4	7		It prevents malaria, a disease.			1000	1	7
2017-01-09 22:32:03	2017-01-09 22:37:23	0	8.33.3.217	2	319	0	2017-01-16 22:37:26	R_2WvAcZ5sTYtPJ36							anonymous	4
2017-01-09 22:37:19	2017-01-09 22:39:29	0	64.166.144.108	24	129	0	2017-01-16 22:39:32	R_TkdEAElZAMjGRWh							anonymous	4	1			101
2017-01-09 22:46:25	2017-01-09 22:50:28	0	70.198.79.200	29	242	0	2017-01-16 22:51:04	R_1pJySXUqMLNXQst							anonymous	4	5		Mosquito repellent would protect a wider range of women			350		5
2017-01-09 22:50:52	2017-01-09 22:51:21	0	206.87.215.158	2	29	0	2017-01-16 22:51:25	R_3CI4hgT1fI0NBN8							anonymous	4
2017-01-09 22:45:34	2017-01-09 22:52:31	0	81.104.255.93	44	416	0	2017-01-16 22:52:37	R_30tWVPM7yBVXD9a							anonymous	4	1	Because of the other benefits outside of zika that free contraception would bring		804	1			1	Because there are still more benefits from free contraception than zika alonegf		837	1
2017-01-09 22:51:40	2017-01-09 22:54:38	0	24.5.226.214	44	177	0	2017-01-16 22:55:20	R_2WB8R13WgtYlcRA							anonymous	4	7		Oral contraception has many health risks to women			1000	1	7		oral contraception is harmful to women's health.			1000	1
2017-01-09 22:34:12	2017-01-09 22:58:12	0	75.151.207.185	68	1440	0	2017-01-16 22:58:32	R_Wwx8oaI6LtGb7MJ							anonymous	4	2	Overpopulation is the world's most pressing problem		1000				1	Overpopulation is the world's most pressing problem		1000				4	7	7	2	1	1
2017-01-09 22:46:01	2017-01-09 22:59:27	0	69.140.150.132	63	806	0	2017-01-16 22:59:30	R_3ey15IP6bp7iyQa							anonymous	4	5		The repellant is less limiting to free choice. If people wish to have children during this time, they still can.			184		5		Same reason as before: repellant is less limiting. The different-babies argument did not make a difference to me.			182		2	1	2				4	2	4
2017-01-09 23:01:10	2017-01-09 23:01:16	0	92.24.173.43	2	6	0	2017-01-16 23:01:38	R_3lFxEPqd7ZsRC13							anonymous	4
2017-01-09 22:16:45	2017-01-09 22:17:30	0	104.200.154.43	13	45	0	2017-01-16 23:11:11	R_0Vz82cN6CSoD99H							anonymous	4	1
2017-01-09 23:22:17	2017-01-09 23:23:39	0	24.238.13.130	29	81	0	2017-01-16 23:23:48	R_BFKxe3Z9JkhvabD							anonymous	4	7		Avoids ethical complications			719	1	7
2017-01-09 23:24:03	2017-01-09 23:24:15	0	157.119.89.49	2	12	0	2017-01-16 23:24:17	R_3nftmcFweFIvCSw							anonymous	4
2017-01-09 23:25:46	2017-01-09 23:26:54	0	68.81.230.46	10	67	0	2017-01-16 23:27:00	R_3IwoQm6PteFYqxX							anonymous	4	7
2017-01-09 23:27:06	2017-01-09 23:29:08	0	108.50.58.247	29	121	0	2017-01-16 23:29:51	R_1r1SNqNlPppshd5							anonymous	4	7						1	7
2017-01-09 23:29:03	2017-01-09 23:29:18	0	73.114.27.134	2	14	0	2017-01-16 23:29:52	R_211xe6Nh777u4MH							anonymous	4
2017-01-09 23:27:11	2017-01-09 23:30:30	0	174.5.56.124	2	199	0	2017-01-16 23:30:37	R_9otHAIS5LAvwCJz							anonymous	4
2017-01-09 23:50:32	2017-01-09 23:51:19	0	68.60.6.29	2	47	0	2017-01-16 23:51:21	R_1QoLk7VRku4it4F							anonymous	4
2017-01-10 00:04:25	2017-01-10 00:07:43	0	198.84.200.29	10	197	0	2017-01-17 00:08:09	R_zUwKk29eZFPq0jT							anonymous	4	1
2017-01-10 00:08:34	2017-01-10 00:14:59	0	76.227.237.139	29	384	0	2017-01-17 00:15:45	R_5thYngzZGMO6aC5							anonymous	4	7		Some people don't believe in using contraceptives			640		6
2017-01-09 23:50:00	2017-01-10 00:15:31	0	157.50.202.139	68	1531	0	2017-01-17 00:15:51	R_3oZpJ4AoV0lmhPI							anonymous	4	7		not harmful.I believe human being evolves across generations to be a better human;my role is to serve humanity and not individual lifestyles				1	7		same reason as before ;contraception presumes things which it should not;				1	4	4	4	1	1	1
2017-01-10 00:15:08	2017-01-10 00:17:23	0	69.119.232.230	24	135	0	2017-01-17 00:17:38	R_4Nhglk9TUHX8TVn							anonymous	4	7		People should be free to have children			1000
2017-01-10 00:50:07	2017-01-10 00:50:46	0	76.204.7.32	10	38	0	2017-01-17 00:50:50	R_2qgcd68MVtuxwf0							anonymous	4	7
2017-01-10 00:43:07	2017-01-10 00:51:18	0	46.22.169.190	54	490	0	2017-01-17 00:51:20	R_3mfZzfS5LvERdAJ							anonymous	4	6		Cant explain it			501		5		Cause It doesn't affect the future babies			417								3	3	4
2017-01-10 01:18:00	2017-01-10 01:19:24	0	173.49.62.187	2	83	0	2017-01-17 01:19:59	R_1FOImlc4mVBmNnH							anonymous	4
2017-01-10 01:50:05	2017-01-10 01:50:39	0	47.9.153.23	2	33	0	2017-01-17 01:50:40	R_VXANX3RpqCaO9R7							anonymous	4
2017-01-10 02:44:31	2017-01-10 02:47:47	0	65.78.10.71	24	195	0	2017-01-17 02:48:25	R_1P7xO6UDHWbxYWe							anonymous	4	1	Cause it has larger side benefits		1000
2017-01-10 04:56:44	2017-01-10 04:57:35	0	192.222.225.38	10	50	0	2017-01-17 04:58:21	R_1hX6vvso7utOsWf							anonymous	4	2
2017-01-10 04:12:33	2017-01-10 05:00:52	0	108.208.149.132	13	2899	0	2017-01-17 05:12:45	R_em5nj7Ak4jy7xqJ							anonymous	4	7
2017-01-10 05:14:37	2017-01-10 05:14:43	0	94.210.146.62	2	6	0	2017-01-17 05:14:54	R_3dQFGRdWfuUtNKX							anonymous	4
2017-01-10 05:29:06	2017-01-10 05:33:22	0	24.202.40.30	29	256	0	2017-01-17 05:34:09	R_28MoVcizCit3g1E							anonymous	4	3	less pollution		101				3
2017-01-10 05:33:30	2017-01-10 05:34:30	0	75.141.136.117	10	59	0	2017-01-17 05:35:03	R_3DhUzpnJScO9KSz							anonymous	4	1
2017-01-10 05:53:01	2017-01-10 06:05:22	0	49.207.200.33	78	741	0	2017-01-17 06:06:00	R_2wsEiDRpixCcYzL							anonymous	4	1	Contraception is a sure methodology to day.			1			1	contraception method is a sure of avoiding virus.			1			1	1	1	1	1	1	5	5	5
2017-01-17 05:56:06	2017-01-17 06:21:53	0	189.216.197.245	100	1547	1	2017-01-17 06:21:55	R_3CNMGYx0t9SA33W					19.434204101562	-99.138603210449	anonymous	4	1	It also prevents STD		200				1	It seems that we will be debating upon imaginary things with these new scenarios		200				3	4	3	2	4	2	2	2	2	1	Mexican	27	5	2	2	2	2
2017-01-10 06:50:09	2017-01-10 06:57:35	0	150.129.110.247	29	446	0	2017-01-17 06:57:45	R_3h5r2usPWwtZDVe							anonymous	4	1	The cost of caring for microcephalic babies in every way would be huge..so prevention of arrival of microcephalic babies makes sense.		1000	1			1
2017-01-10 06:56:55	2017-01-10 06:57:39	0	94.210.41.42	10	43	0	2017-01-17 06:58:26	R_3qrrDY4M0lneU4w							anonymous	4	1
2017-01-09 06:10:50	2017-01-10 07:20:32	0	172.58.19.9	2	90581	0	2017-01-17 07:21:22	R_2Yac8FZeatzGazD							anonymous	4
2017-01-10 08:09:42	2017-01-10 08:09:49	0	81.108.68.203	2	7	0	2017-01-17 08:09:50	R_1j7h5KpNgKcaICH							anonymous	4
2017-01-10 07:43:43	2017-01-10 07:44:25	0	24.246.12.186	2	42	0	2017-01-17 08:13:13	R_8e8JF7qXOVR9R7n							anonymous	4
2017-01-10 08:49:11	2017-01-10 08:51:08	0	122.107.240.163	10	117	0	2017-01-17 08:51:13	R_1HeiHkO4GoPYwH9							anonymous	4	2
2017-01-08 19:23:37	2017-01-10 09:32:29	0	2.126.15.3	29	137331	0	2017-01-17 09:32:31	R_1ojptox3m50bmpz							anonymous	4	7		Because it allows parents to have children when they want at no additional risk.			144		7
2017-01-10 10:48:10	2017-01-10 10:48:51	0	82.4.131.180	24	40	0	2017-01-17 10:49:43	R_2eR6VhCHju3cwGW							anonymous	4	4
2017-01-10 08:56:36	2017-01-10 13:43:44	0	217.65.199.237	63	17228	0	2017-01-17 14:14:40	R_1B8UDYqKVJHebHf							anonymous	4	2	Because Mosquito repellent would disbalance the relations in nature		788				2	Its human babies, humans should be affected by the concequences of the battla the most		784				4	6	3				2	2	2
2017-01-10 16:10:57	2017-01-10 16:12:17	0	73.151.194.171	10	80	0	2017-01-17 16:13:01	R_1OQaiLpKBRthiQI							anonymous	4	5
2017-01-08 22:28:01	2017-01-10 17:13:44	0	179.212.91.143	10	153943	0	2017-01-17 17:13:46	R_2TYmxe8O5vTaxBY							anonymous	4	7
2017-01-10 16:13:53	2017-01-10 21:46:54	0	31.52.113.109	13	19981	0	2017-01-17 21:47:06	R_cx4xWD5FY69izdj							anonymous	4	6
2017-01-09 22:43:18	2017-01-10 22:39:11	0	165.134.149.121	54	86152	0	2017-01-17 22:39:17	R_2SHL8XmiKh7ZtwP							anonymous	4	3	Condoms would seem more efficient and fool-proof		101				6		Mosquito repellent likely to cause fewer physical/emotional issues than hormonal birth control; would prevent male infection, too; wouldn't create moral conflict for much of the population affected.			201		7	7	7
2017-01-11 00:37:30	2017-01-11 00:45:22	0	124.171.73.29	29	472	0	2017-01-18 00:46:06	R_2dsYfT7Iz7XBAxU							anonymous	4	5		Women could still have babies - thus limits risk of missing your child bearing years if the virus continues			154		5
2017-01-11 01:30:09	2017-01-11 01:30:18	0	24.254.228.244	2	9	0	2017-01-18 01:30:45	R_3nPDf1IBfNXCHt6							anonymous	4
2017-01-10 17:53:21	2017-01-11 02:58:19	0	42.111.9.220	10	32697	0	2017-01-18 02:58:23	R_2alQvvUz0etXXmC							anonymous	4	2
2017-01-11 07:04:01	2017-01-11 07:04:56	0	98.171.188.106	2	55	0	2017-01-18 07:04:58	R_5hwsDfrkClpUUrT							anonymous	4
2017-01-11 11:40:06	2017-01-11 11:43:21	0	189.125.155.119	2	194	0	2017-01-18 11:43:54	R_2aD2G1t0hHTXt4F							anonymous	4
2017-01-11 15:00:54	2017-01-11 15:02:04	0	27.63.166.51	2	70	0	2017-01-18 15:02:34	R_3EMaObWIAsQpccm							anonymous	4
2017-01-08 13:13:10	2017-01-11 16:00:47	0	84.92.230.59	10	269257	0	2017-01-18 16:01:34	R_3DjqjPxdV0XcUyQ							anonymous	4	7
2017-01-11 17:02:14	2017-01-11 17:05:13	0	47.29.87.160	44	179	0	2017-01-18 17:05:39	R_AdFfasbRJeasLEB							anonymous	4	1				1			4
2017-01-11 18:18:19	2017-01-11 18:19:55	0	169.149.62.160	59	95	0	2017-01-18 18:20:05	R_1Quyl44nlwd681K							anonymous	4	4							4										2	4	3
2017-01-11 22:47:38	2017-01-11 22:47:54	0	177.41.35.120	2	16	0	2017-01-18 22:48:17	R_24GyIwnuc1lSlpi							anonymous	4
2017-01-12 02:06:51	2017-01-12 02:08:36	0	189.79.99.168	10	104	0	2017-01-19 02:09:17	R_0cRK5bsiTum33ZT							anonymous	4	2
2017-01-12 02:48:22	2017-01-12 02:48:53	0	202.164.53.117	24	31	0	2017-01-19 02:49:53	R_2aPu2V6oNcj9p8G							anonymous	4	4
2017-01-19 03:03:26	2017-01-19 03:18:22	0	174.204.3.253	100	896	1	2017-01-19 03:18:23	R_3qI36mmlZds6NAz					38.882202148438	-77.141098022461	anonymous	4	6		Mosquito repellent can be applied as part of a routine while contraception has to be available in the moment and would require planning in anticipation.			501	1	6						1	6	6	4	5	3	2	4	4	4	2	American	28	5	3	1	2	1
2017-01-12 04:44:28	2017-01-12 04:46:18	0	14.139.196.4	10	109	0	2017-01-19 04:46:20	R_A04mnOWLYLx9kzv							anonymous	4	5
2017-01-11 23:35:26	2017-01-12 05:50:01	0	203.174.135.178	44	22475	0	2017-01-19 05:50:17	R_3NCKPioQbHYnxcw							anonymous	4	1	I thought it would be more effective.		101				7		Equally effective but the repellent provided more choice.			101
2017-01-12 06:15:02	2017-01-12 06:15:10	0	108.205.234.159	2	7	0	2017-01-19 06:15:17	R_2dFvsAY2BsnR6On							anonymous	4
2017-01-12 09:50:37	2017-01-12 09:51:31	0	144.173.23.31	2	54	0	2017-01-19 09:52:30	R_2bTz1fSUogxzOu1							anonymous	4
2017-01-12 12:36:43	2017-01-12 12:36:50	0	117.199.55.29	2	7	0	2017-01-19 12:37:46	R_3EyFzLp8ytqBBcw							anonymous	4
2017-01-12 12:49:31	2017-01-12 12:53:32	0	125.22.83.3	10	240	0	2017-01-19 12:54:17	R_2w4dnvgg6qYwHul							anonymous	4	2
2017-01-12 12:53:54	2017-01-12 12:54:19	0	86.163.125.142	2	25	0	2017-01-19 12:54:25	R_3EX7lQYwFytN7ho							anonymous	4
2017-01-12 13:56:19	2017-01-12 13:57:16	0	47.8.187.78	2	57	0	2017-01-19 13:57:43	R_1dhsXXp0i0hIvqC							anonymous	4
2017-01-12 14:05:33	2017-01-12 14:09:08	0	42.106.101.250	29	214	0	2017-01-19 14:09:10	R_1kXMhYeaxswwCLO							anonymous	4	6					1000	1	6
2017-01-12 15:41:36	2017-01-12 15:42:09	0	47.15.55.160	10	32	0	2017-01-19 15:42:14	R_3I9Q4ttDS3W016j							anonymous	4	3
2017-01-12 15:56:36	2017-01-12 15:57:17	0	47.29.24.202	10	41	0	2017-01-19 15:57:45	R_2dzQcJUj4dcJ1XZ							anonymous	4	1
2017-01-11 17:25:08	2017-01-12 16:48:38	0	182.237.148.20	24	84209	0	2017-01-19 16:49:26	R_3IbdXriEIpZkzIs							anonymous	4	5					201	1
2017-01-12 17:53:25	2017-01-12 17:58:20	0	106.67.26.132	10	294	0	2017-01-19 17:59:11	R_1CgewSvi7OWjjif							anonymous	4	6
2017-01-12 21:09:31	2017-01-12 21:11:19	0	177.182.179.35	10	107	0	2017-01-19 21:11:40	R_2xVtPdLPEHMWBZ8							anonymous	4	1
2017-01-12 22:22:14	2017-01-12 22:23:17	0	187.104.57.207	2	62	0	2017-01-19 22:23:21	R_3g0BEtjBGWXQT6v							anonymous	4
2017-01-08 19:42:08	2017-01-12 22:58:35	0	72.43.235.246	2	357386	0	2017-01-19 22:58:41	R_pR6OnADHMywccGl							anonymous	4
2017-01-12 22:59:28	2017-01-12 23:00:24	0	94.197.121.192	10	55	0	2017-01-19 23:00:27	R_Wfh1n7spSY7e1QR							anonymous	4	1
2017-01-13 00:57:50	2017-01-13 01:14:40	0	76.167.151.218	10	1009	0	2017-01-20 01:14:52	R_3exE3AkzxJ5ADbR							anonymous	4	1
2017-01-13 03:31:04	2017-01-13 03:35:43	0	86.191.254.6	29	279	0	2017-01-20 03:36:21	R_31EQabWeafP7hym							anonymous	4	5		still allows some women the choice to conceive if they want to, while protecting them from the risks			101		5
2017-01-13 05:57:35	2017-01-13 06:00:55	0	106.222.93.17	10	199	0	2017-01-20 06:01:07	R_cAciort8lkrKM2l							anonymous	4	1
2017-01-13 09:09:42	2017-01-13 09:11:56	0	80.192.127.102	24	134	0	2017-01-20 09:11:58	R_3lzvqGWQjL07PwY							anonymous	4	2	Too many people on the planet			1
2017-01-13 09:15:19	2017-01-13 09:17:02	0	42.106.120.245	24	102	0	2017-01-20 09:17:17	R_21zvWyFi32Qr4Ne							anonymous	4	4
[truncated: 1 more columns]
